# Supplementary material for: In Vitro selectivity of an acyclic cucurbit[n]uril molecular container towards neuromuscular blocking agents relative to commonly used drugs
Source: Royal Society of Chemistry journal article supplement (doi:10.1039/c5ob02356d), 2015-12-03
Supplement: c5ob02356d1.pdf [file c5ob02356d1.pdf]

# ***In Vitro* Selectivity of an Acyclic Cucurbit[n]uril Molecular Container towards Neuromuscular Blocking Agents Relative to Commonly Used Drugs**

By Shweta Ganapati,<sup>a</sup> Peter Y. Zavalij,<sup>a</sup> Matthias Eikermann<sup>b,\*</sup> and Lyle Isaacs<sup>a,\*</sup>

<sup>a</sup>Department of Chemistry and Biochemistry, University of Maryland, College Park, MD 20742;

<sup>b</sup>Department of Anesthesia, Critical Care and Pain Medicine, Massachusetts General Hospital and Harvard Medical School, 55 Fruit Street, Boston, Massachusetts 02114

## Supporting Information

| <b>Table of Contents</b>                                                                                                                                  | <b>Pages</b> |
|-----------------------------------------------------------------------------------------------------------------------------------------------------------|--------------|
| General experimental details                                                                                                                              | S2           |
| Procedures and binding models for UV/Vis titrations                                                                                                       | S2-S4        |
| UV/Vis spectra and plots of absorbance data for K <sub>a</sub> determination of various drugs with <b>2</b>                                               | S5-S24       |
| Binding model for <sup>1</sup> H NMR titrations and plots of chemical shift data for K <sub>a</sub> determination by direct <sup>1</sup> H NMR titrations | S25-S32      |
| <sup>1</sup> H NMR stack plots for drugs with <b>2</b>                                                                                                    | S33-S59      |
| Job plots of selected drugs with <b>2</b>                                                                                                                 | S60-S63      |
| Three dimensional surface plot of [AChR•NMBA] versus log [Drug] and log K <sub>3</sub> for vecuronium with 2 equivalents of calabadiion <b>2</b>          | S65          |
| Three dimensional surface plot of [AChR•NMBA] versus log [Drug] and log K <sub>3</sub> for cisatracurium with 32 equivalents of calabadiion <b>2</b>      | S65          |
| Three dimensional surface plot of [AChR•NMBA] versus log [Drug] and log K <sub>3</sub> for cisatracurium with 16 equivalents of calabadiion <b>2</b>      | S66          |

**General experimental details.** Drugs used for measuring binding constants with **2** were purchased from commercial suppliers and used without further purification. Compound **2** was prepared according to the literature procedure.<sup>1</sup> <sup>1</sup>H NMR spectra were measured on commercial spectrometers operating at 400 or 600 MHz. UV-Vis absorbance was measured on a Varian Cary 100 UV spectrophotometer.

**Determination of  $K_a$  between Host **2** with various drugs using UV/Vis spectroscopy.**  $K_a$  values up to  $10^4 \text{ M}^{-1}$  can be measured reliably by <sup>1</sup>H NMR spectroscopic methods. For values that exceed this level it is necessary to use other techniques such as UV/Vis, fluorescence, or isothermal titration calorimetry. UV/Vis spectroscopy was used in this work.

The  $K_a$  between **2** and **4** (tetracycline, UV/Vis active drug) was determined by direct titration of a fixed concentration of **4** with increasing concentrations of **2**. The  $K_a$  value was determined by fitting the change in absorbance as a function of host concentration to a 1:1 binding model. In order to determine the  $K_a$  value for **2** toward guests which were not UV/Vis active, an indicator displacement assay involving the addition of guest to a solution of **2** and dye Rhodamine 6G was used. The change in UV/Vis absorbance as a function of guest concentration was fitted to a competitive binding model which allowed determination of the  $K_a$  values based on the known total concentrations of **2**, Rhodamine 6G, and drug. The known  $K_a$  value of the **2**•Rhodamine 6G complex ( $2.3 \times 10^6 \text{ M}^{-1}$ ) was used as input in the competitive binding model.<sup>2</sup>

References: 1) D. Ma, G. Hettiarachchi, D. Nguyen, B. Zhang, J. B. Wittenberg, P. Y. Zavalij, V. Briken, L. Isaacs *Nat. Chem.* 2012, **4**, 503-510. 2) D. Ma, B. Zhang, U. Hoffmann, M. G. Sundrug, M. Eikermann, L. Isaacs *Angew. Chem. Int. Ed.* 2012, **51**, 11358-11362.

## Binding Models Used to Determine Values of $K_a$ with Micromath Scientist

### ***1:1 Binding Model for UV/Vis.***

```
// Micromath Scientist Model File
// 1:1 Host:Guest binding model
//This model assumes the guest concentration is fixed and host concentration is varied
IndVars: ConcHostTot
DepVars: SpectroscopicSignal
Params: Ka, ConcGuestTot, SpectroscopicSignalMin, SpectroscopicSignalMax
Ka = ConcHostGuest/(ConcHostFree*ConcGuestFree)
ConcHostTot=ConcHostFree + ConcHostGuest
ConcGuestTot=ConcGuestFree + ConcHostGuest
SpectroscopicSignal = SpectroscopicSignalMin + (SpectroscopicSignalMax - SpectroscopicSignalMin)
* (ConcHostGuest/ConcGuestTot)
//Constraints
0 < ConcHostFree < ConcHostTot
0 < Ka
0 < ConcGuestFree < ConcGuestTot
0 < ConcHostGuest < ConcHostTot
```

### ***Competitive Binding (Indicator Displacement) Models.***

#### ***Competitive Model Fitting Absorbance at One Wavelength.***

```
// MicroMath Scientist Model File
IndVars: ConcAntot
DepVars: Absorb
Params: ConcHtot, ConcGtot, Khg, Kha, AbsorbMax, AbsorbMin
Khg = ConcHG / (ConcH * ConcG)
Kha = ConcHAN / (ConcH * ConcAn)
Absorb = AbsorbMin + (AbsorbMax-AbsorbMin)*(ConcHG/ConcGtot)
ConcHtot = ConcH + ConcHG + ConcHAN
ConcGtot = ConcHG + ConcG
ConcAntot = ConcAn + ConcHAN
0 < ConcHG < ConcHtot
0 < ConcH < ConcHtot
0 < ConcG < ConcGtot
0 < ConcAn < ConcAntot
***
```

#### ***Competitive Model Fitting Absorbance at Two Wavelengths.***

```
// MicroMath Scientist Model File
IndVars: ConcAntot
DepVars: Absorb1, Absorb2
Params:Khg, Kha, AbsorbMax1, AbsorbMin1, AbsorbMax2, AbsorbMin2
Khg = ConcHG / (ConcH * ConcG)
```

$K_{ha} = \text{ConcHAn} / (\text{ConcH} * \text{ConcAn})$   
 $\text{Absorb1} = \text{AbsorbMin1} + (\text{AbsorbMax1} - \text{AbsorbMin1}) * (\text{ConcHG} / 0.00001)$   
 $\text{Absorb2} = \text{AbsorbMin2} + (\text{AbsorbMax2} - \text{AbsorbMin2}) * (\text{ConcHG} / 0.00001)$   
 $0.00001 = \text{ConcH} + \text{ConcHG} + \text{ConcHAn}$   
 $0.00001 = \text{ConcHG} + \text{ConcG}$   
 $\text{ConcAntot} = \text{ConcAn} + \text{ConcHAn}$   
 $0 < \text{ConcHG} < 0.00001$   
 $0 < \text{ConcH} < 0.00001$   
 $0 < \text{ConcG} < 0.00001$   
 $0 < \text{ConcAn} < \text{ConcAntot}$   
\*\*\*



(A)

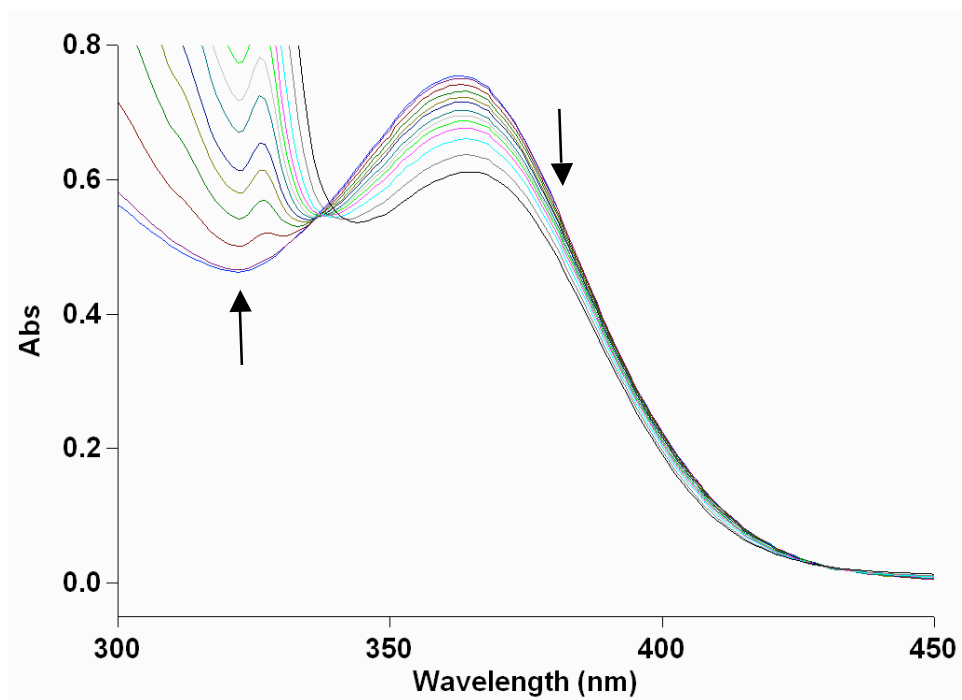

(B)

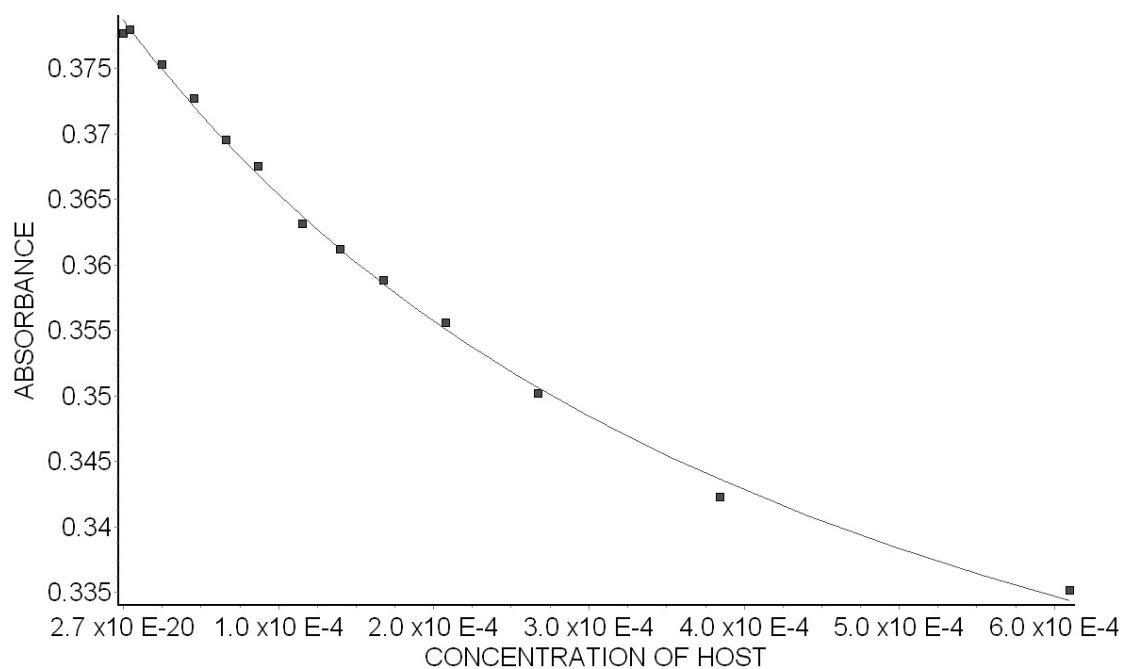

**Figure S1.** (A) UV/Vis spectra from the titration of **2** (0–610  $\mu\text{M}$ ) with guest **4** (57.3  $\mu\text{M}$ ) in 20 mM  $\text{NaH}_2\text{PO}_4$  buffer (pH = 7.4); (B) plot of the  $A_{390}$  as a function of the concentration of **2**. The solid line represents the best non-linear fit of the data to a 1:1 binding model ( $K_a = (2.3 \pm 0.2) \times 10^3 \text{ M}^{-1}$ ).

(A)

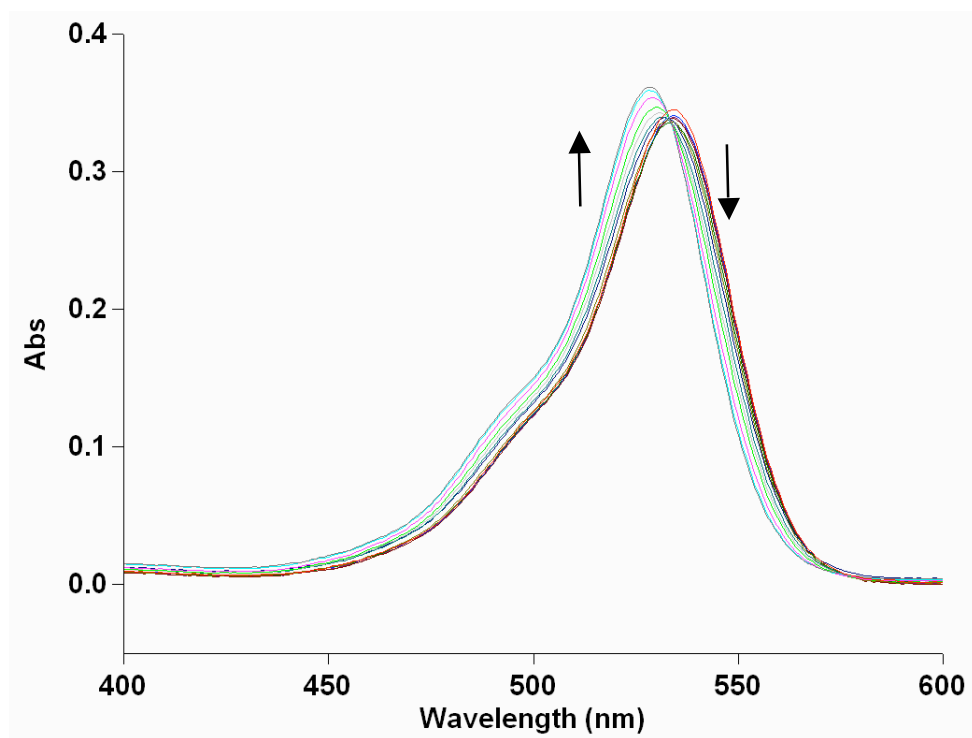

(B)

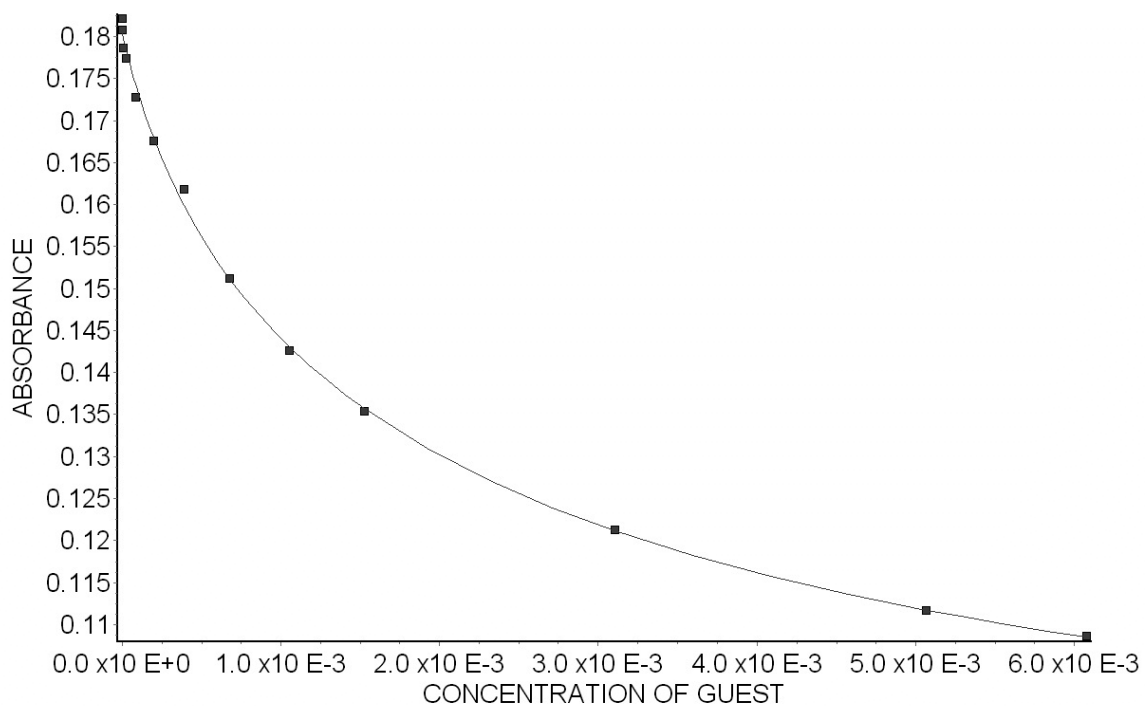

**Figure S2.** (A) UV/Vis spectra from the titration of **2** (5.07 μM) and Rhodamine 6G (5.01 μM) with guest **8** (0 – 6.08 mM) in 20 mM NaH<sub>2</sub>PO<sub>4</sub> buffer (pH = 7.4); (B) plot of the A<sub>550</sub> as a function of the concentration of **8**. The solid line represents the best non-linear fit of the data to a competitive binding model ( $K_a = (5.9 \pm 0.5) \times 10^3 \text{ M}^{-1}$ ).

(A)

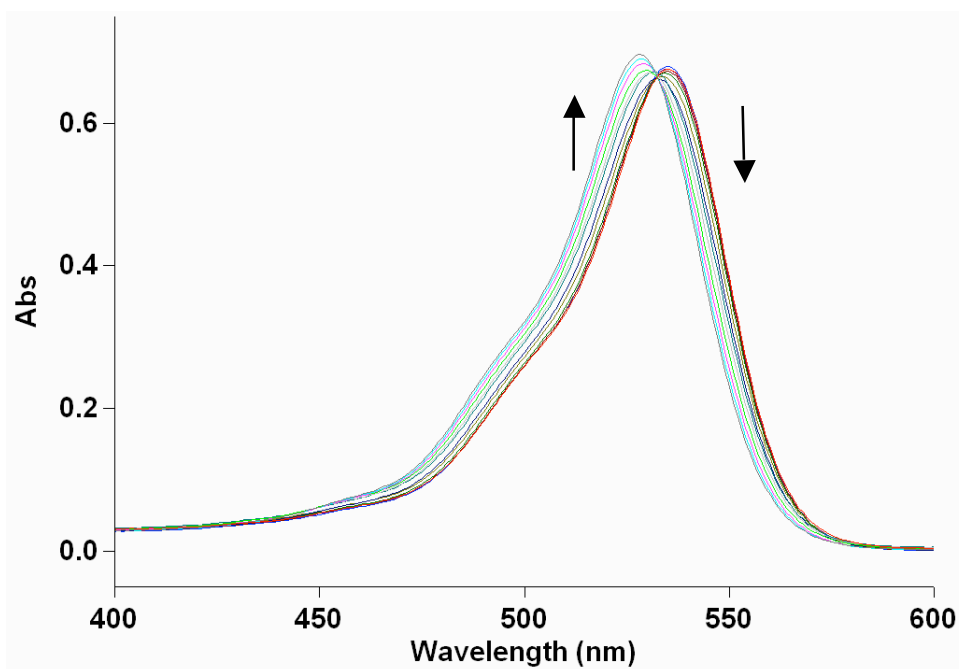

(B)

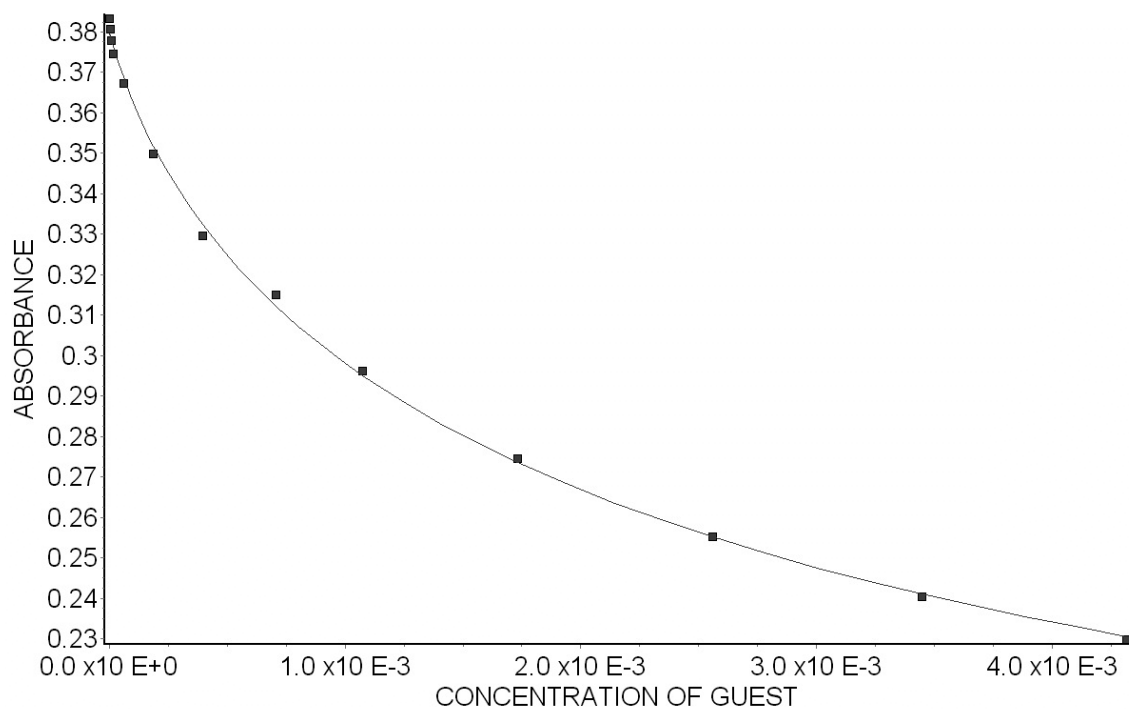

**Figure S3.** (A) UV/Vis spectra from the titration of **2** (10.1  $\mu\text{M}$ ) and Rhodamine 6G (9.96  $\mu\text{M}$ ) with guest **10** (0 – 4.32 mM) in 20 mM  $\text{NaH}_2\text{PO}_4$  buffer (pH = 7.4); (B) plot of the  $A_{550}$  as a function of the concentration of **10**. The solid line represents the best non-linear fit of the data to a competitive binding model ( $K_a = (8.6 \pm 0.8) \times 10^3 \text{ M}^{-1}$ ).

(A)

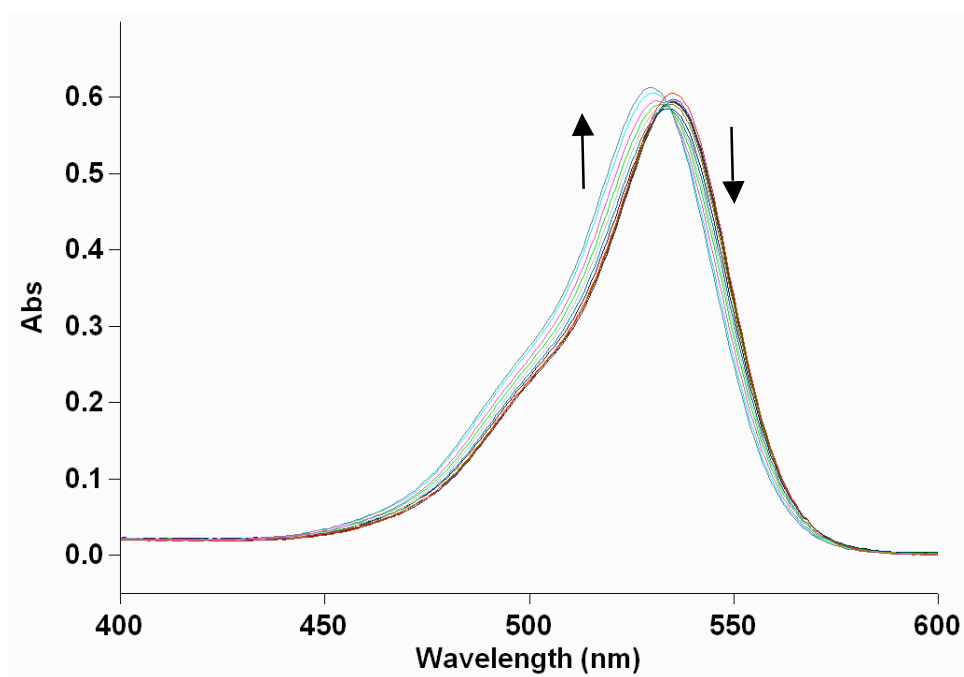

(B)

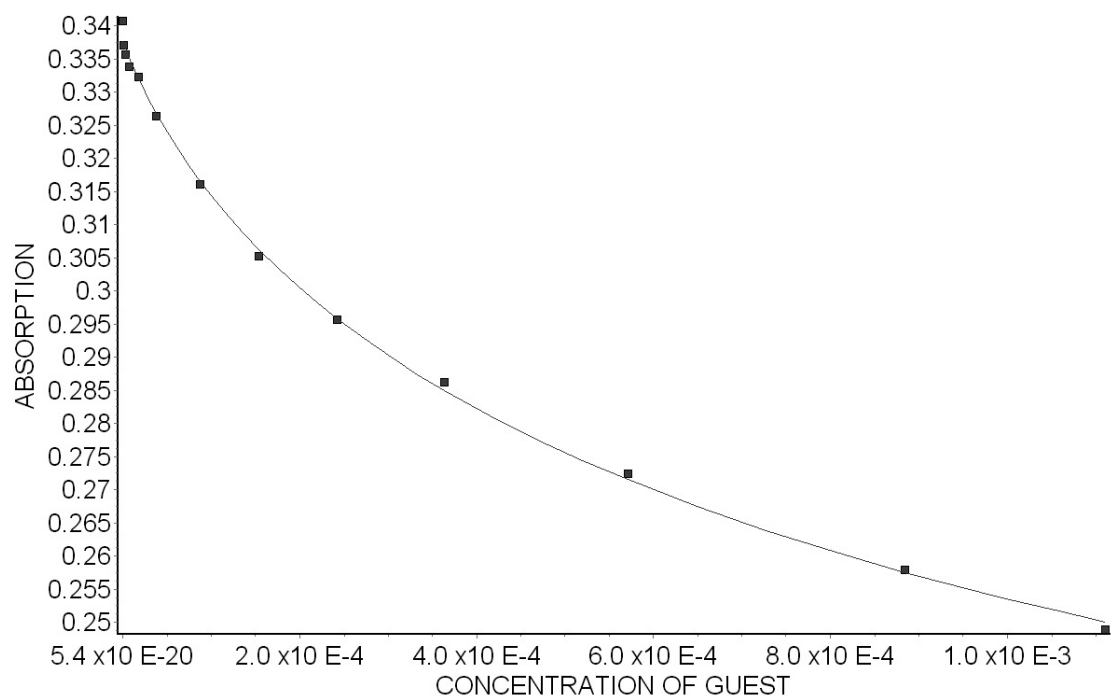

**Figure S4.** (A) UV/Vis spectra from the titration of **2** (9.98 μM) and Rhodamine 6G (9.96 μM) with guest **12** (0 – 1.11 mM) in 20 mM NaH<sub>2</sub>PO<sub>4</sub> buffer (pH = 7.4); (B) plot of the A<sub>550</sub> as a function of the concentration of **12**. The solid line represents the best non-linear fit of the data to a competitive binding model ( $K_a = (2.1 \pm 0.2) \times 10^4 \text{ M}^{-1}$ ).

(A)

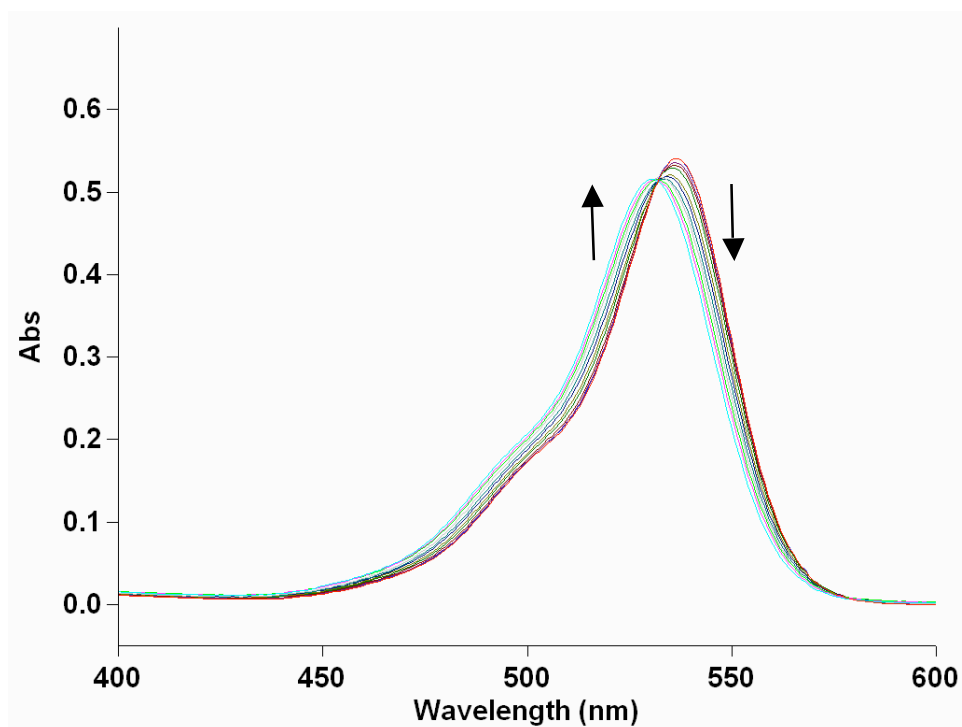

(B)

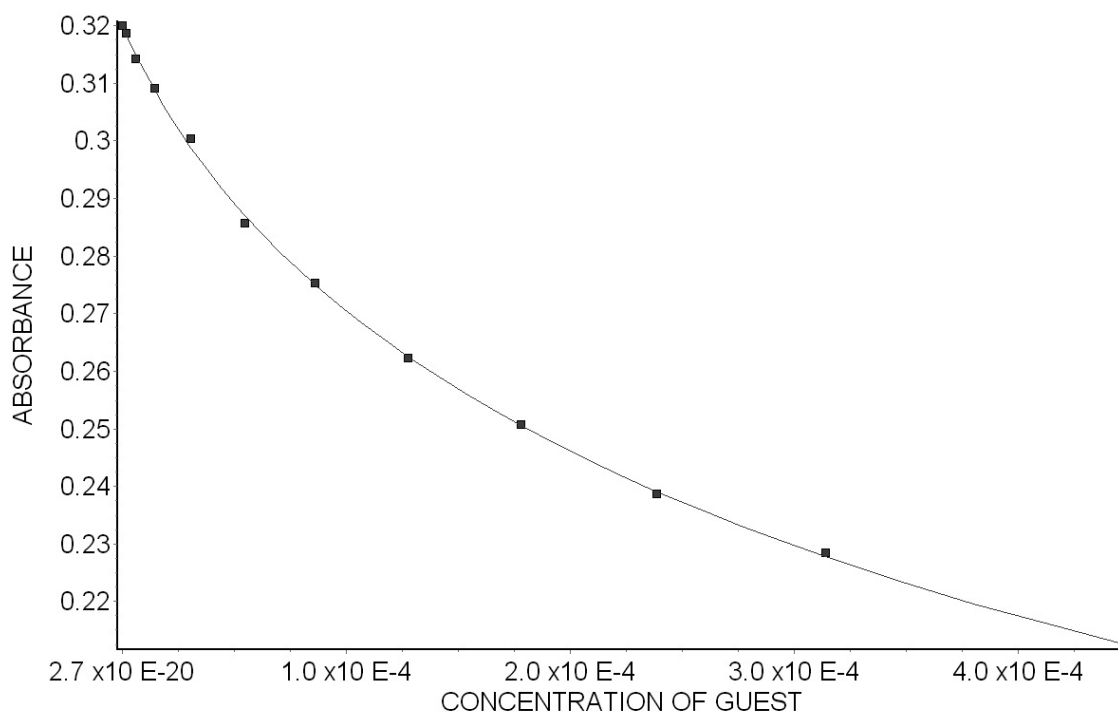

**Figure S5.** (A) UV/Vis spectra from the titration of **2** (10.2 μM) and Rhodamine 6G (9.96 μM) with guest **14** (0 – 447 μM) in 20 mM NaH<sub>2</sub>PO<sub>4</sub> buffer (pH = 7.4); (B) plot of the  $A_{550}$  as a function of the concentration of **14**. The solid line represents the best non-linear fit of the data to a competitive binding model ( $K_a = (4.4 \pm 0.3) \times 10^4 \text{ M}^{-1}$ ).

(A)

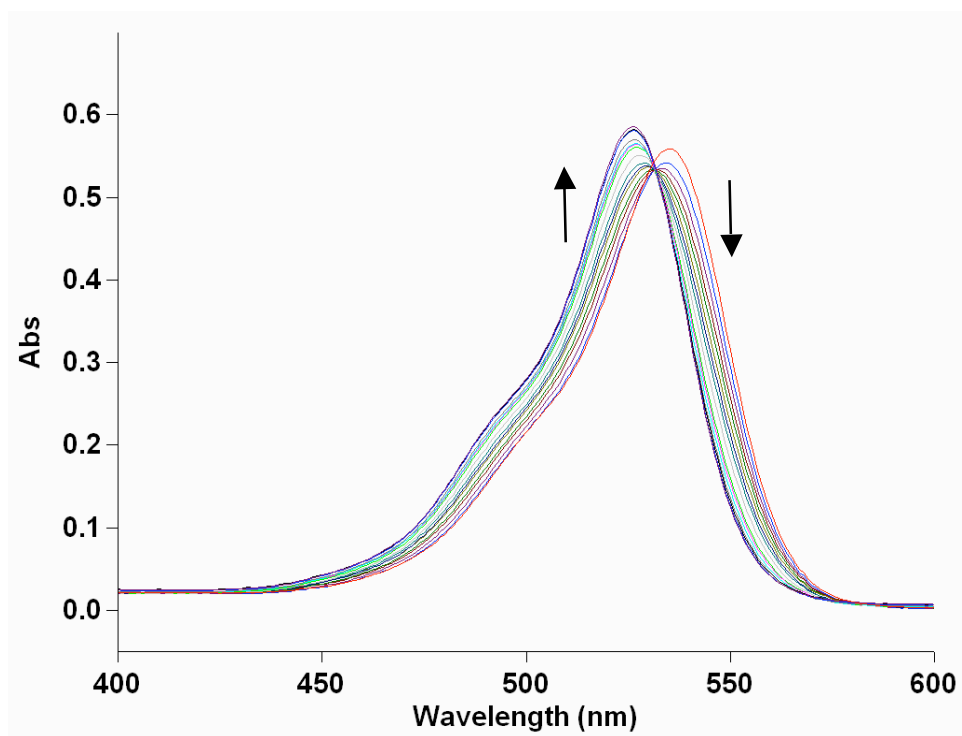

(B)

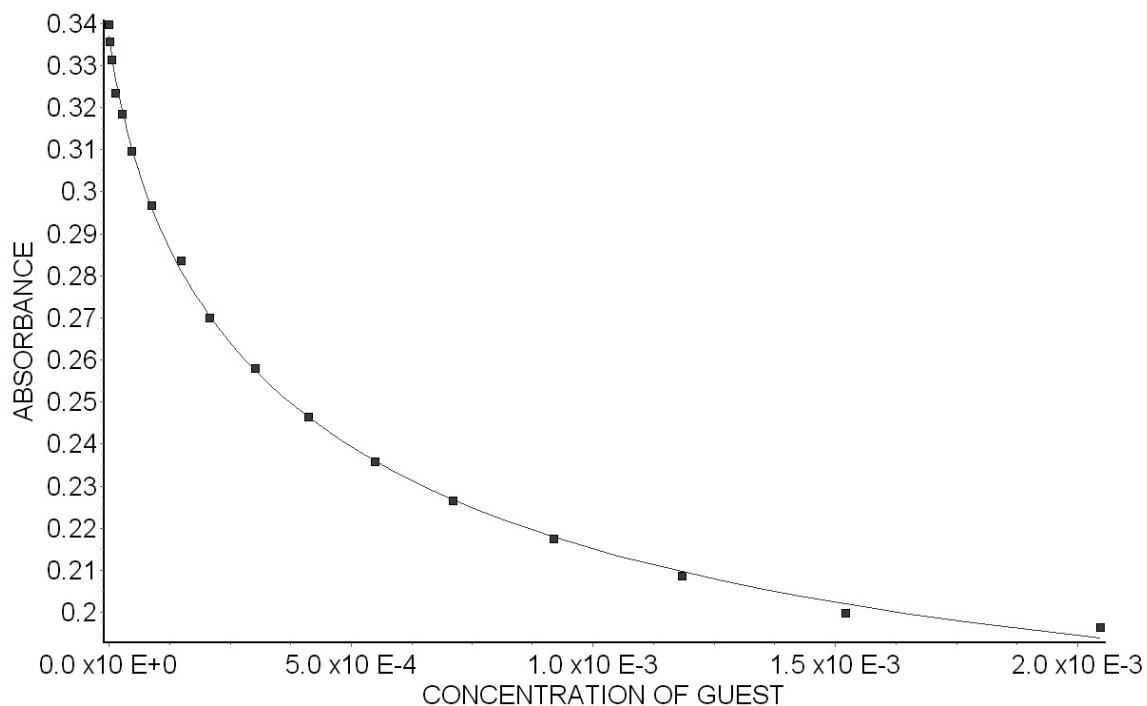

**Figure S6.** (A) UV/Vis spectra from the titration of **2** ( $9.92 \mu\text{M}$ ) and Rhodamine 6G ( $10.0 \mu\text{M}$ ) with guest **15** ( $0 - 2.05 \text{ mM}$ ) in  $20 \text{ mM NaH}_2\text{PO}_4$  buffer ( $\text{pH} = 7.4$ ); (B) plot of the  $A_{550}$  as a function of the concentration of **15**. The solid line represents the best non-linear fit of the data to a competitive binding model ( $K_a = (4.8 \pm 0.3) \times 10^4 \text{ M}^{-1}$ )

(A)

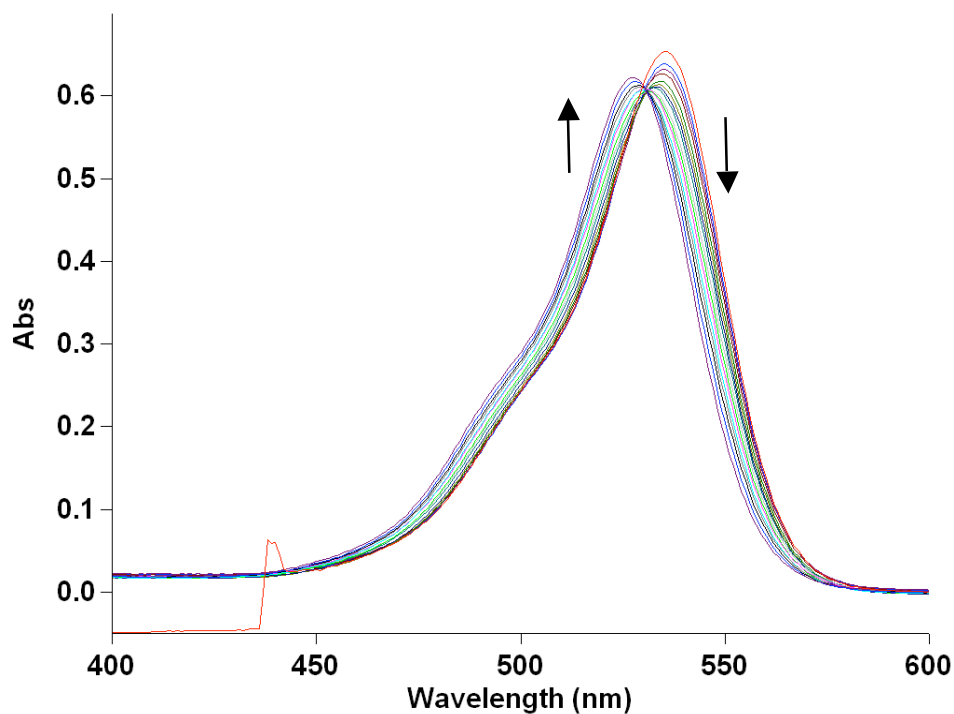

(B)

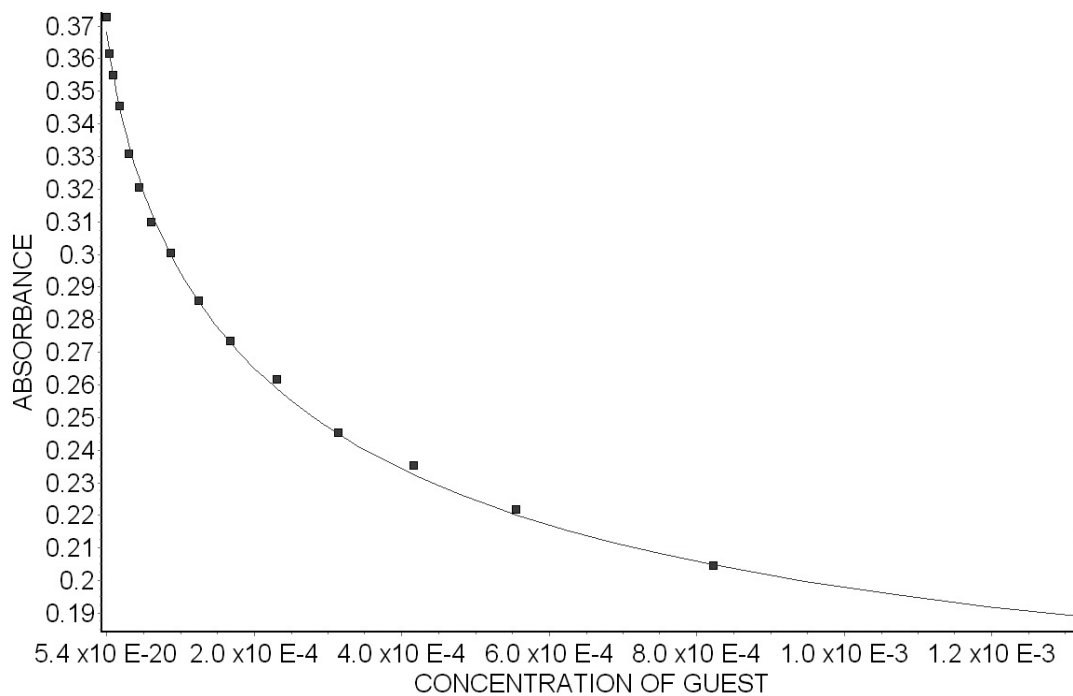

**Figure S7.** (A) UV/Vis spectra from the titration of **2** (9.92 μM) and Rhodamine 6G (10.0 μM) with guest **16** (0 – 1.32 mM) in 20 mM NaH<sub>2</sub>PO<sub>4</sub> buffer (pH = 7.4); (B) plot of the A<sub>550</sub> as a function of the concentration of **16**. The solid line represents the best non-linear fit of the data to a competitive binding model ( $K_a = (8.3 \pm 0.6) \times 10^4 \text{ M}^{-1}$ ).

(A)

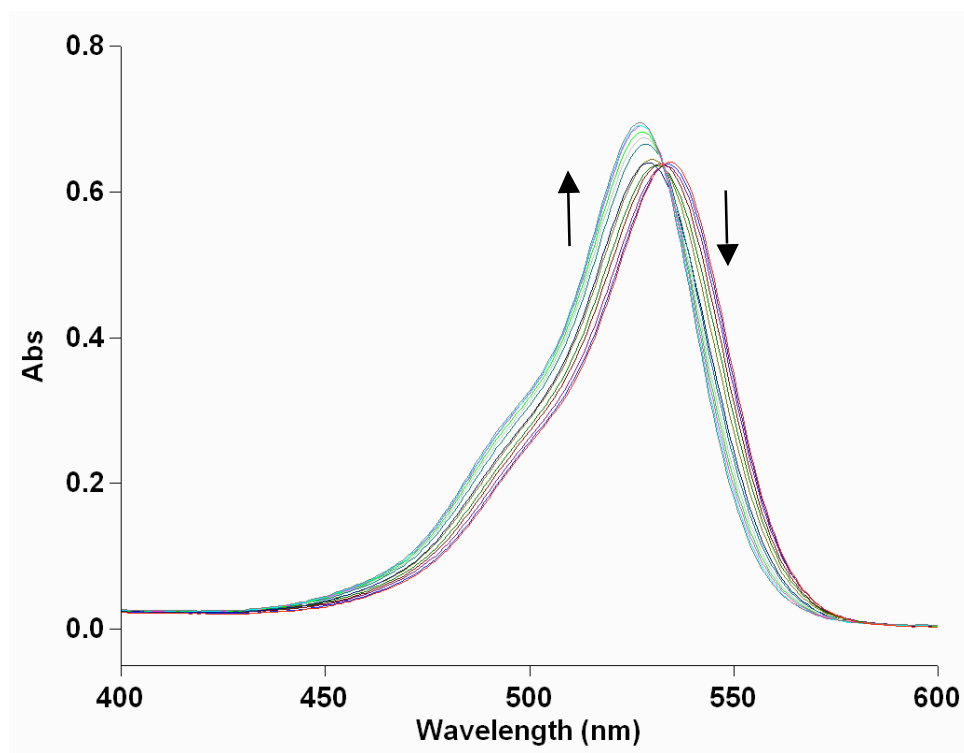

(B)

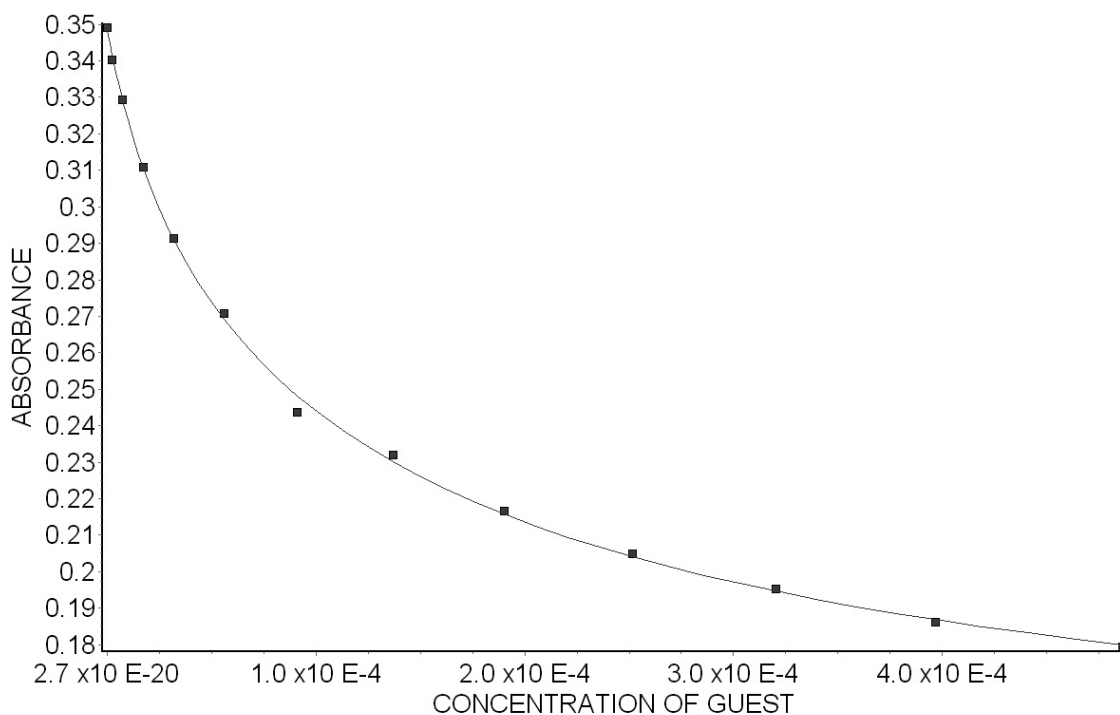

**Figure S8.** (A) UV/Vis spectra from the titration of **2** ( $10.1 \mu\text{M}$ ) and Rhodamine 6G ( $9.96 \mu\text{M}$ ) with guest **17** ( $0 - 486 \mu\text{M}$ ) in  $20 \text{ mM NaH}_2\text{PO}_4$  buffer ( $\text{pH} = 7.4$ ); (B) plot of the  $A_{550}$  as a function of the concentration of **17**. The solid line represents the best non-linear fit of the data to a competitive binding model ( $K_a = (1.9 \pm 0.1) \times 10^5 \text{ M}^{-1}$ ).



(A)

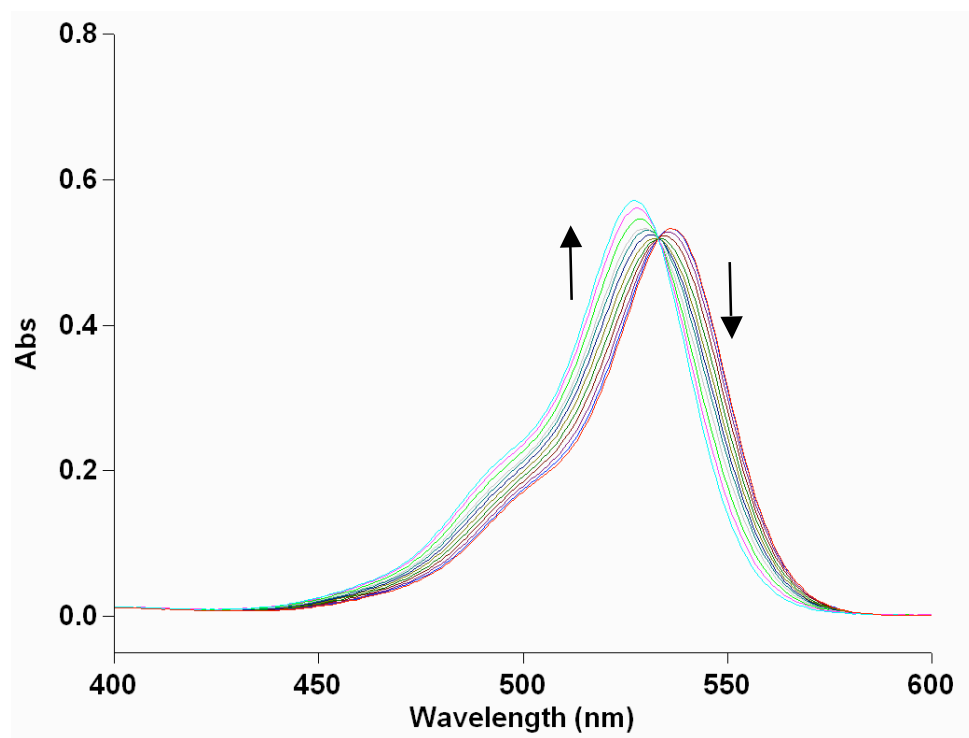

(B)

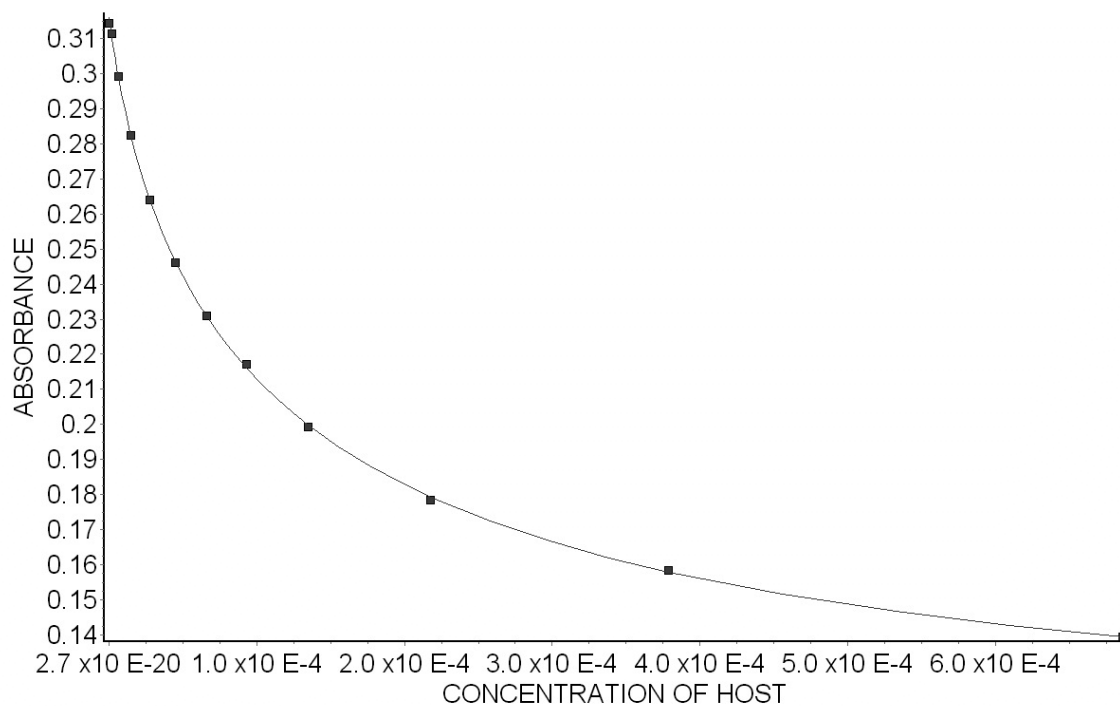

**Figure S9.** (A) UV/Vis spectra from the titration of **2** (10.2 μM) and Rhodamine 6G (9.96 μM) with guest **18** (0 – 686 μM) in 20 mM NaH<sub>2</sub>PO<sub>4</sub> buffer (pH = 7.4); (B) plot of the A<sub>550</sub> as a function of the concentration of **18**. The solid line represents the best non-linear fit of the data to a competitive binding model ( $K_a = (1.9 \pm 0.6) \times 10^5 \text{ M}^{-1}$ ).

(A)

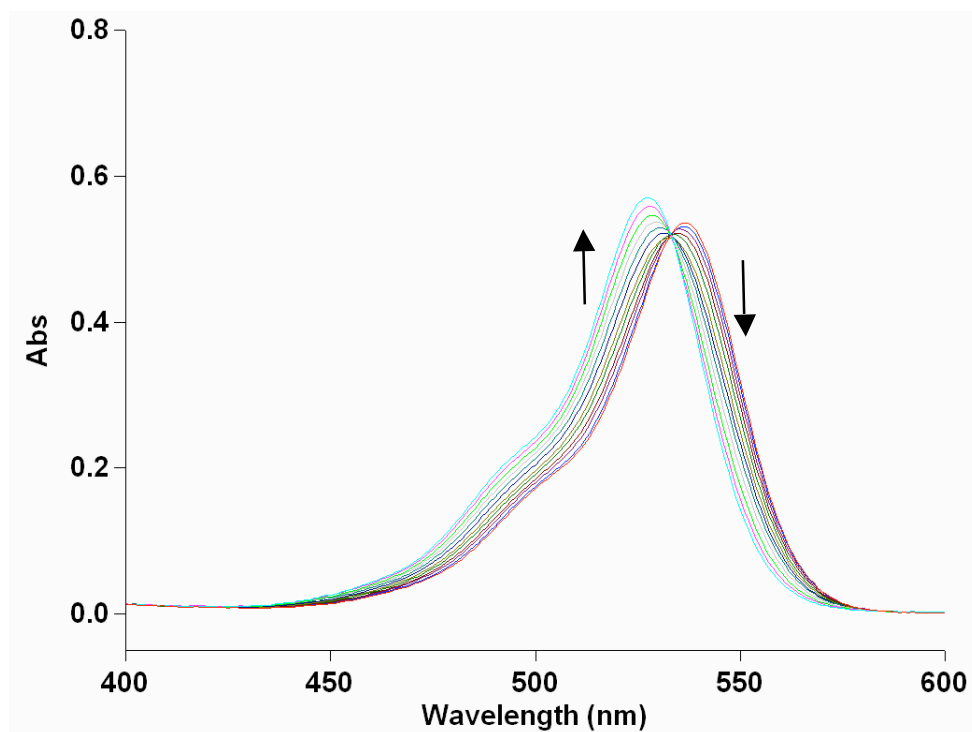

(B)

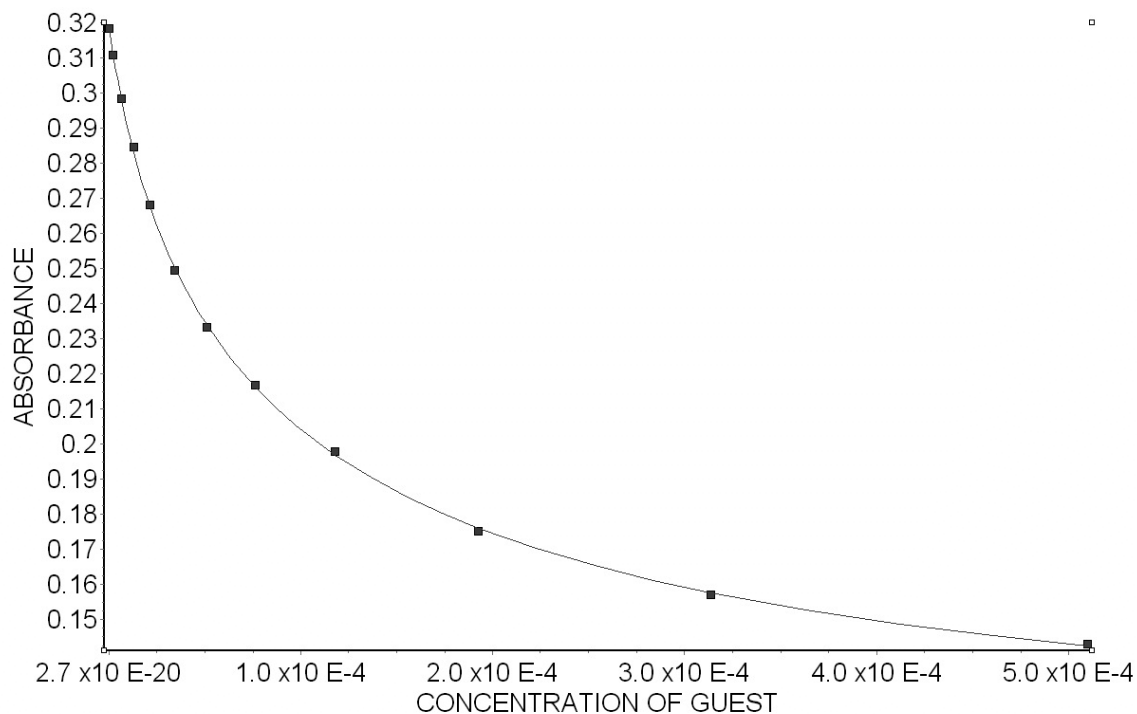

**Figure S10.** (A) UV/Vis spectra from the titration of **2** (10.2 μM) and Rhodamine 6G (10.3 μM) with guest **19** (0 – 510 μM) in 20 mM NaH<sub>2</sub>PO<sub>4</sub> buffer (pH = 7.4); (B) plot of the A<sub>550</sub> as a function of the concentration of **19**. The solid line represents the best non-linear fit of the data to a competitive binding model ( $K_a = (2.5 \pm 0.7) \times 10^5 \text{ M}^{-1}$ ).

(A)

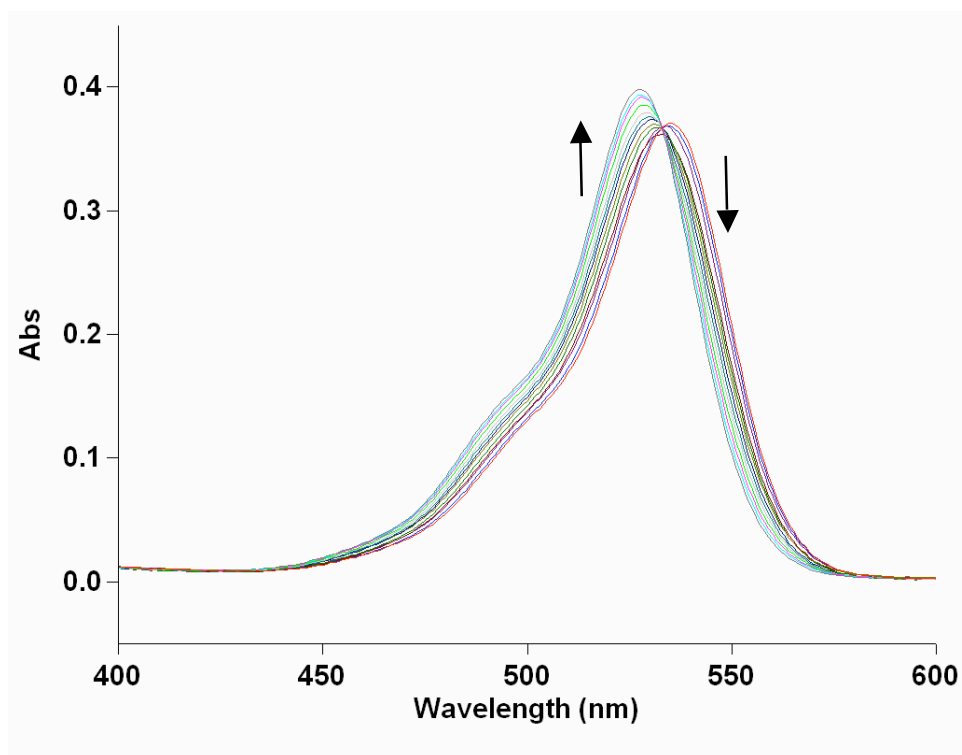

(B)

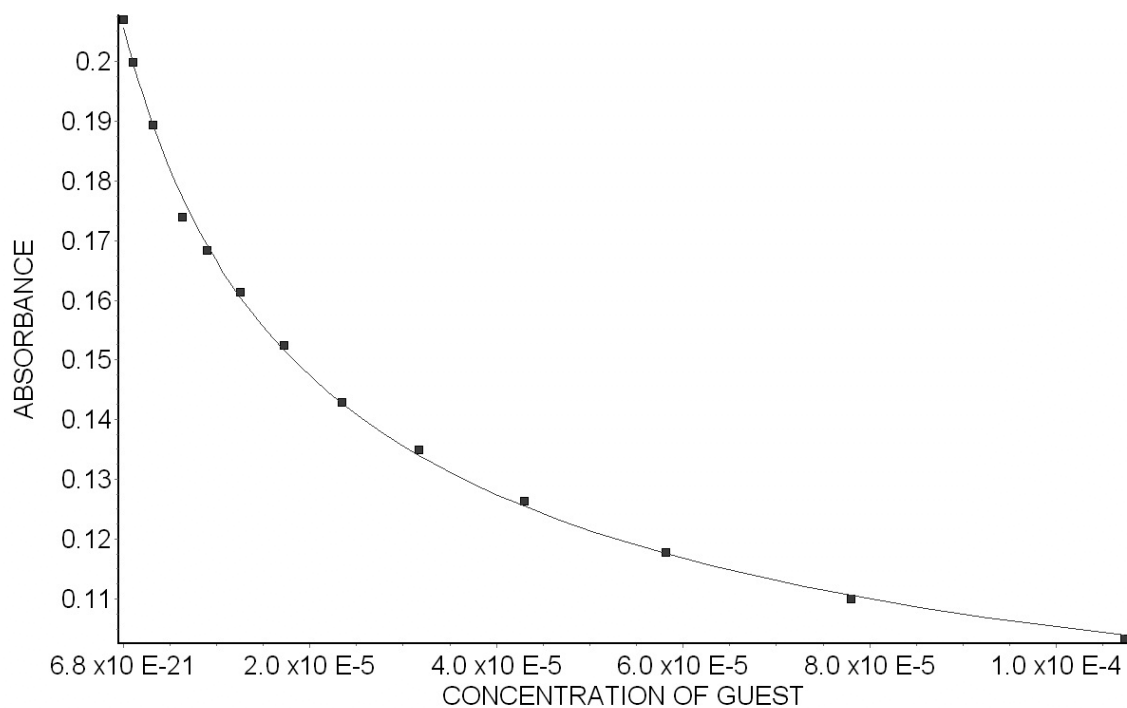

**Figure S11.** (A) UV/Vis spectra from the titration of **2** ( $5.07 \mu\text{M}$ ) and Rhodamine 6G ( $5.01 \mu\text{M}$ ) with guest **20** ( $0 - 107 \mu\text{M}$ ) in 20 mM  $\text{NaH}_2\text{PO}_4$  buffer (pH = 7.4); (B) plot of the  $A_{550}$  as a function of the concentration of **20**. The solid line represents the best non-linear fit of the data to a competitive binding model ( $K_a = (5.3 \pm 0.4) \times 10^5 \text{ M}^{-1}$ ).

(A)

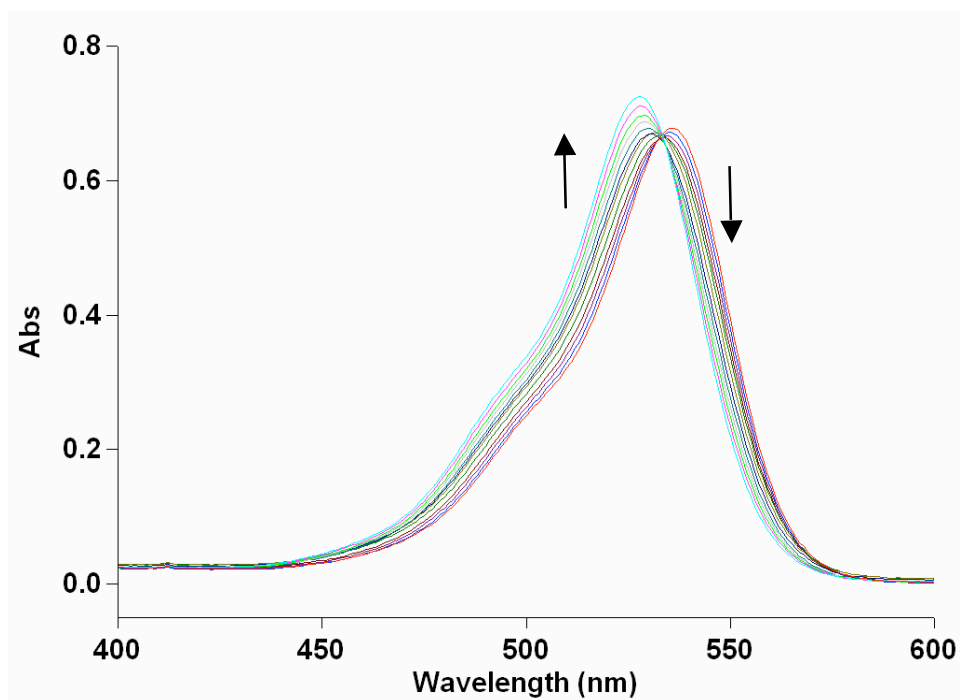

(B)

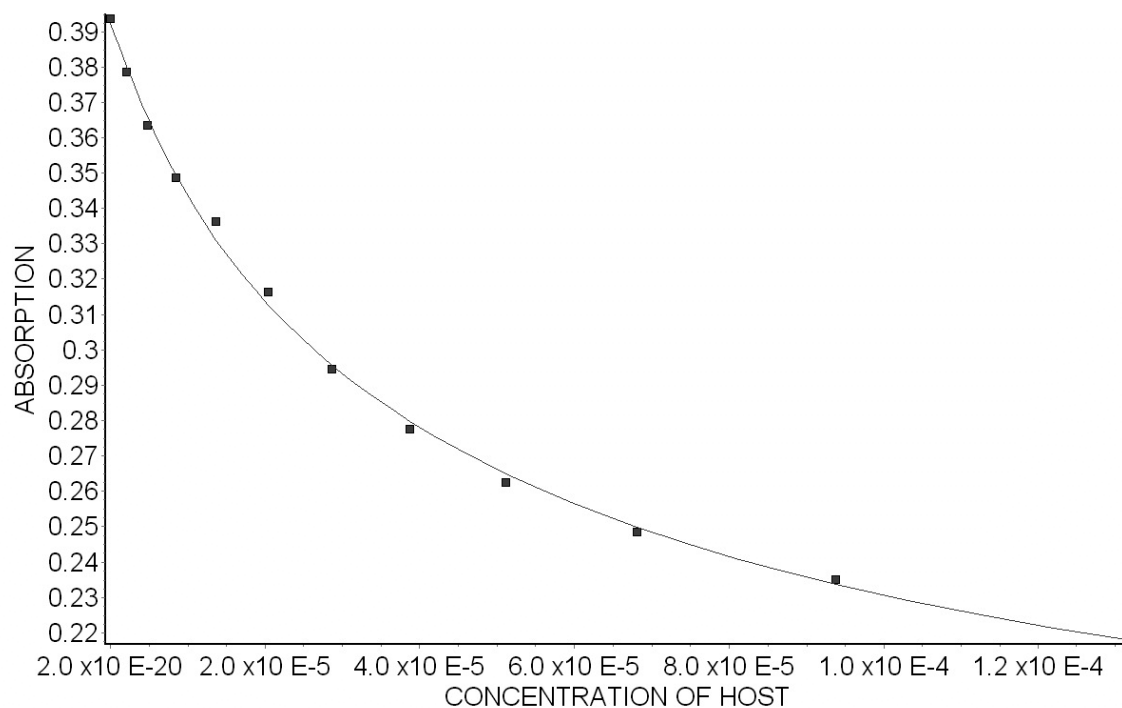

**Figure S12.** (A) UV/Vis spectra from the titration of **2** (12.5  $\mu\text{M}$ ) and Rhodamine 6G (12.4  $\mu\text{M}$ ) with guest **21** (0–131  $\mu\text{M}$ ) in 20 mM  $\text{NaH}_2\text{PO}_4$  buffer (pH = 7.4); (B) plot of the  $A_{550}$  as a function of the concentration of **21**. The solid line represents the best non-linear fit of the data to a competitive binding model ( $K_a = (5.9 \pm 0.7) \times 10^5 \text{ M}^{-1}$ ).

(A)

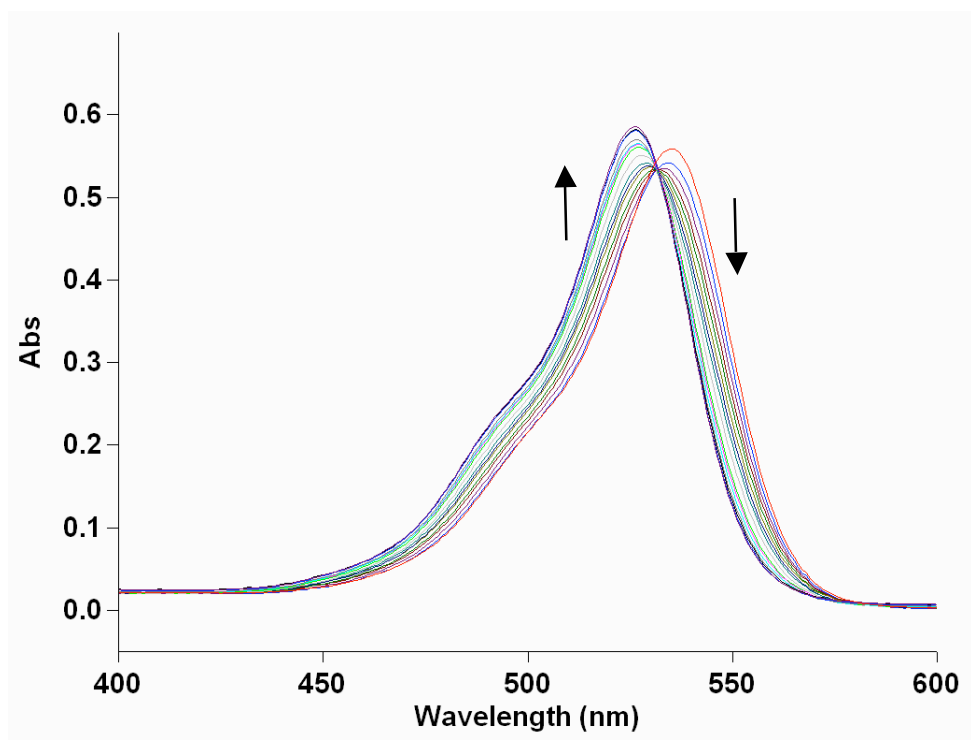

(B)

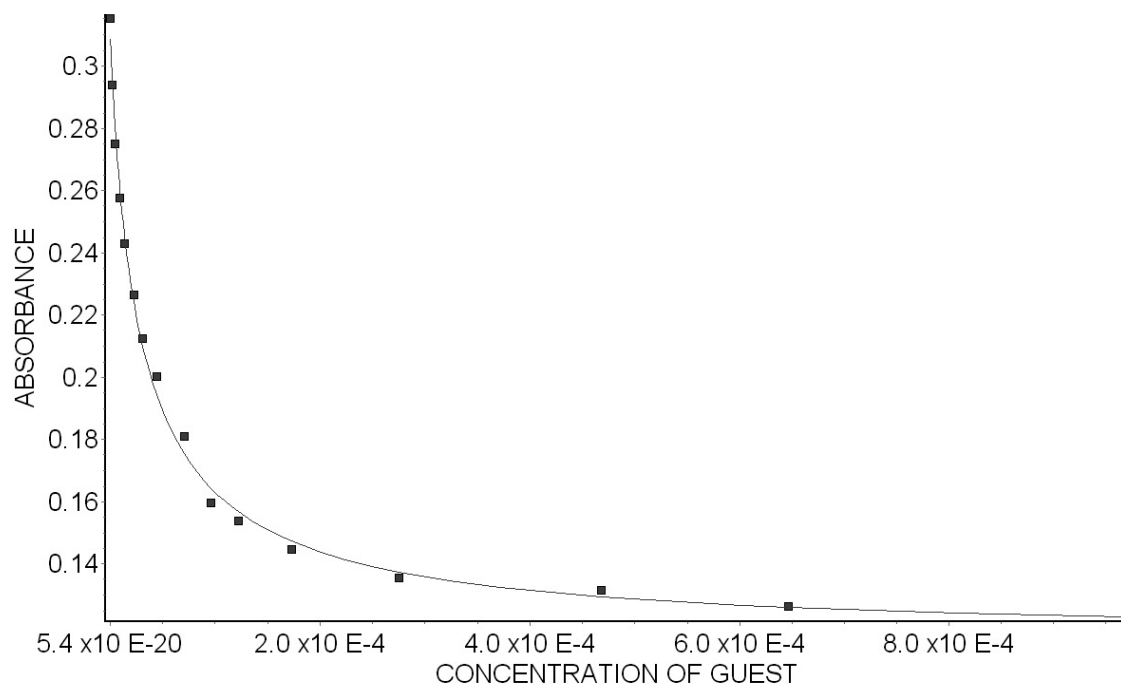

**Figure S13.** (A) UV/Vis spectra from the titration of **2** (9.92 μM) and Rhodamine 6G (10.0 μM) with guest **22** (0 – 968 μM) in 20 mM NaH<sub>2</sub>PO<sub>4</sub> buffer (pH = 7.4); (B) plot of the A<sub>550</sub> as a function of the concentration of **22**. The solid line represents the best non-linear fit of the data to a competitive binding model ( $K_a = (8.0 \pm 0.7) \times 10^5 \text{ M}^{-1}$ ).

(A)

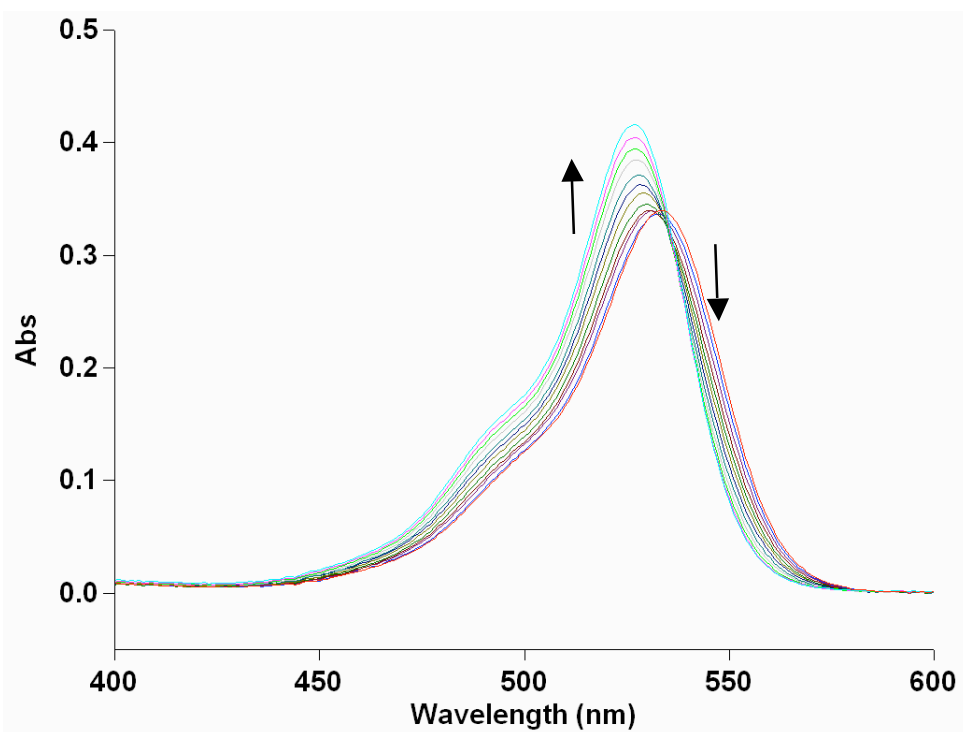

(B)

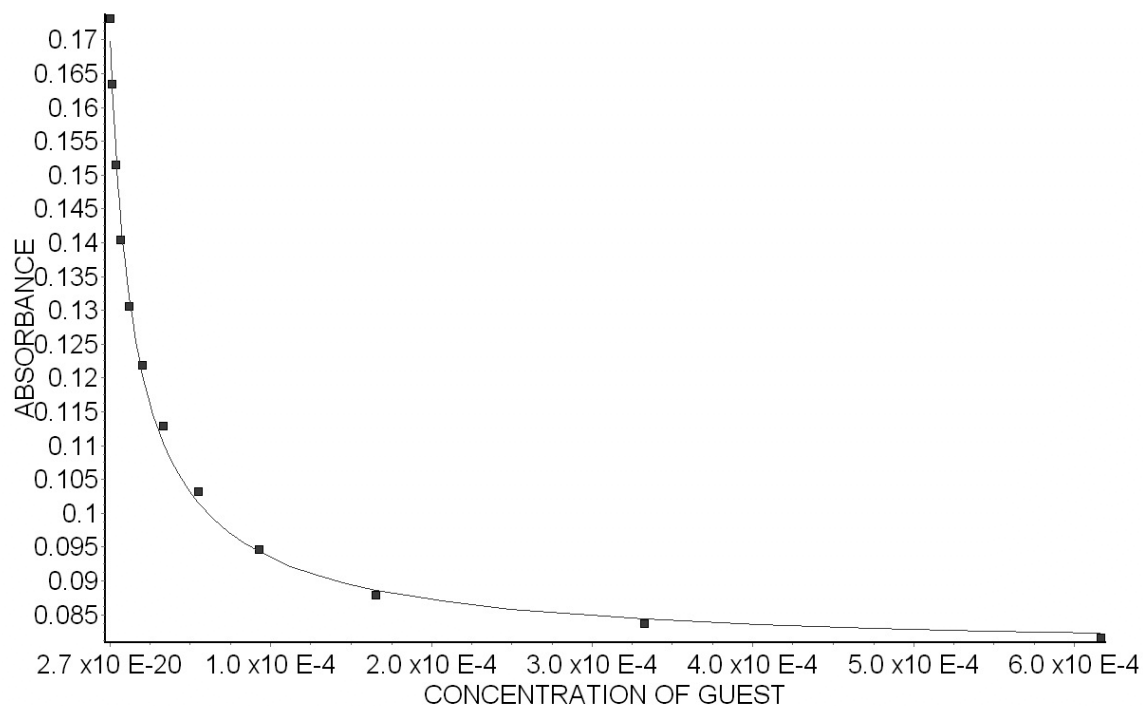

**Figure S14.** (A) UV/Vis spectra from the titration of **2** (5.07 μM) and Rhodamine 6G (5.01 μM) with guest **23** (0 – 616 μM) in 20 mM NaH<sub>2</sub>PO<sub>4</sub> buffer (pH = 7.4); (B) plot of the A<sub>550</sub> as a function of the concentration of **23**. The solid line represents the best non-linear fit of the data to a competitive binding model ( $K_a = (8.2 \pm 0.9) \times 10^5 \text{ M}^{-1}$ ).

(A)

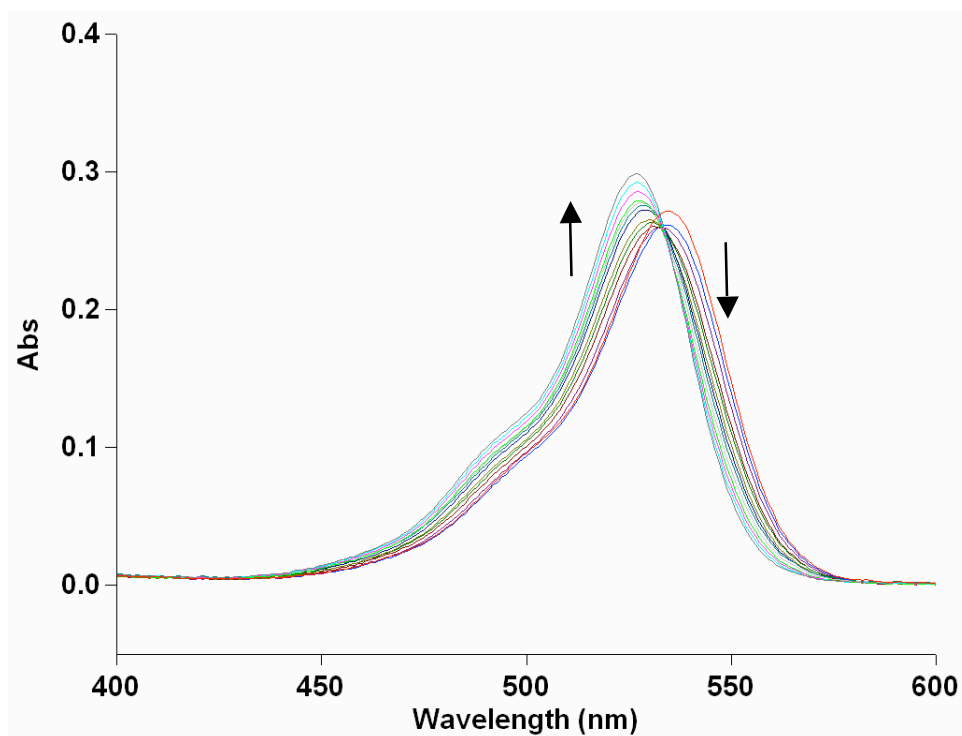

(B)

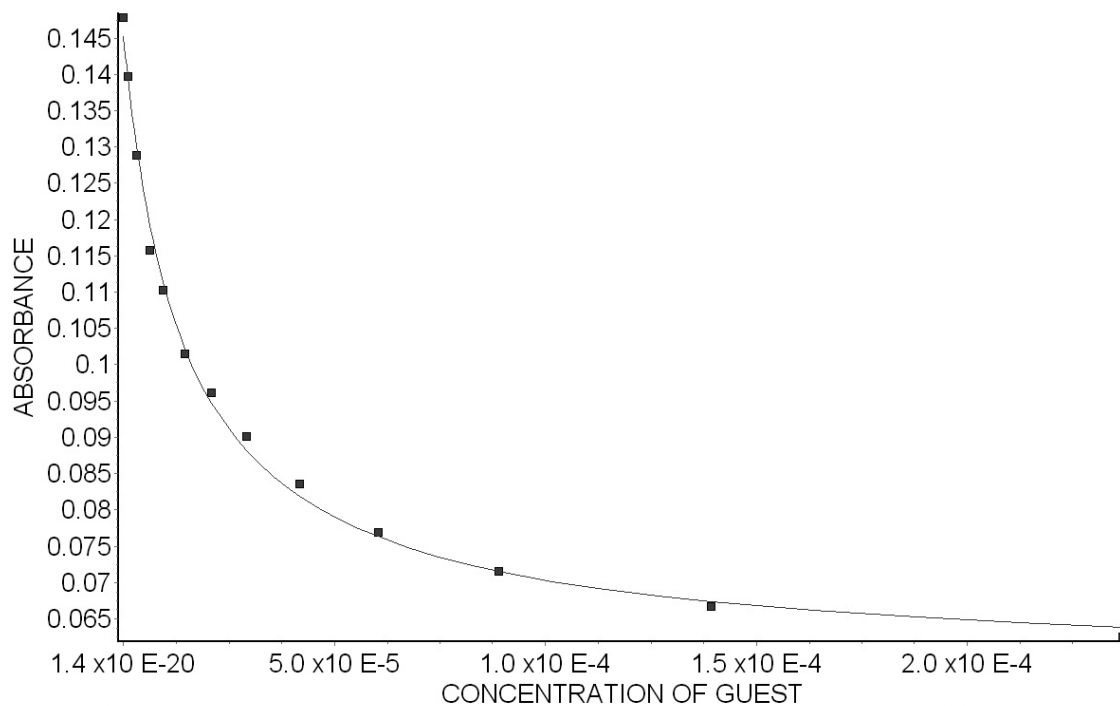

**Figure S15.** (A) UV/Vis spectra from the titration of **2** (5.07 μM) and Rhodamine 6G (5.01 μM) with guest **24** (0 – 237 μM) in 20 mM NaH<sub>2</sub>PO<sub>4</sub> buffer (pH = 7.4); (B) plot of the A<sub>550</sub> as a function of the concentration of **24**. The solid line represents the best non-linear fit of the data to a competitive binding model ( $K_a = (9.3 \pm 0.9) \times 10^5 \text{ M}^{-1}$ ).

(A)

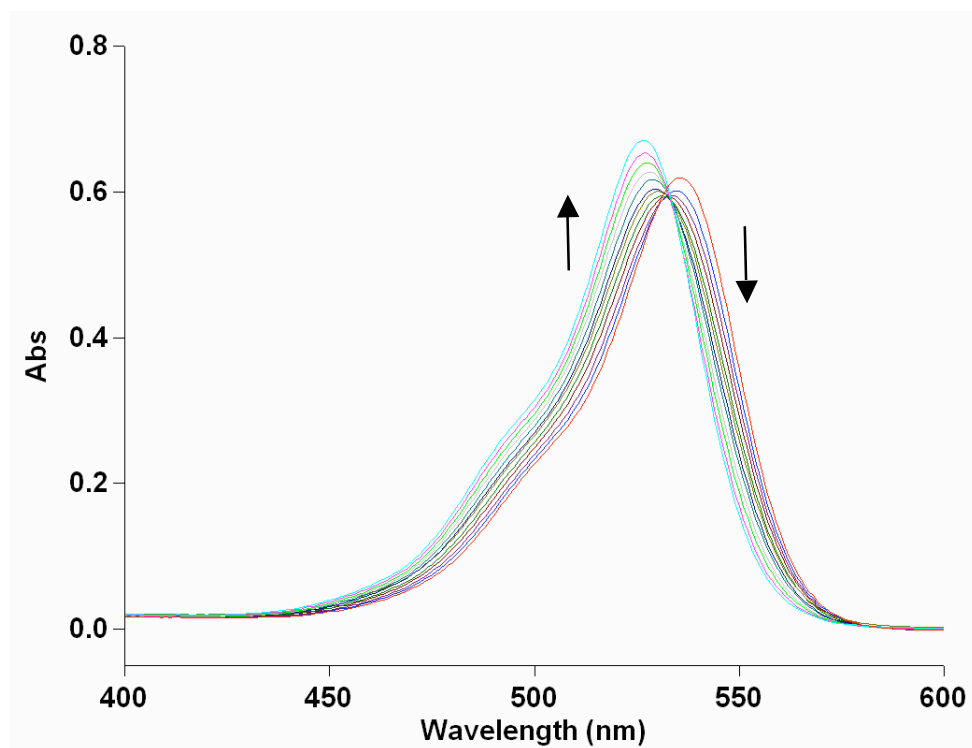

(B)

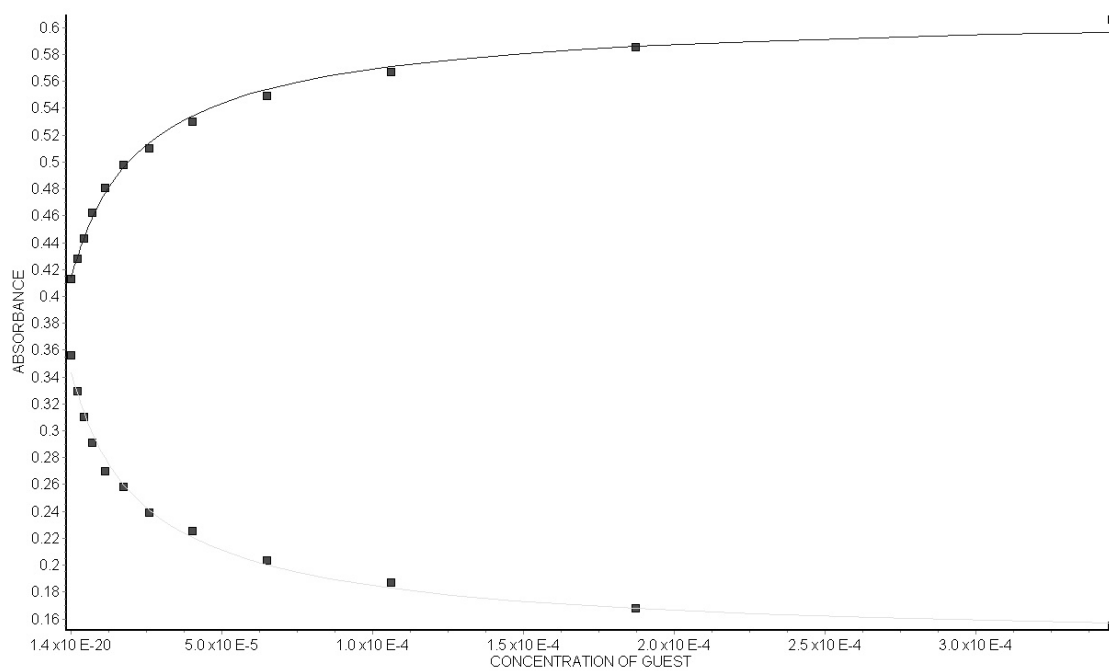

**Figure S16.** (A) UV/Vis spectra from the titration of **2** ( $10.1 \mu\text{M}$ ) and Rhodamine 6G ( $9.96 \mu\text{M}$ ) with guest **25** ( $0 - 345 \mu\text{M}$ ) in  $20 \text{ mM NaH}_2\text{PO}_4$  buffer ( $\text{pH} = 7.4$ ); (B) plot of the  $A_{550}$  as a function of the concentration of **25**. The solid line represents the best non-linear fit of the data to a competitive binding model ( $K_a = (9.7 \pm 1.1) \times 10^5 \text{ M}^{-1}$ )



(A)

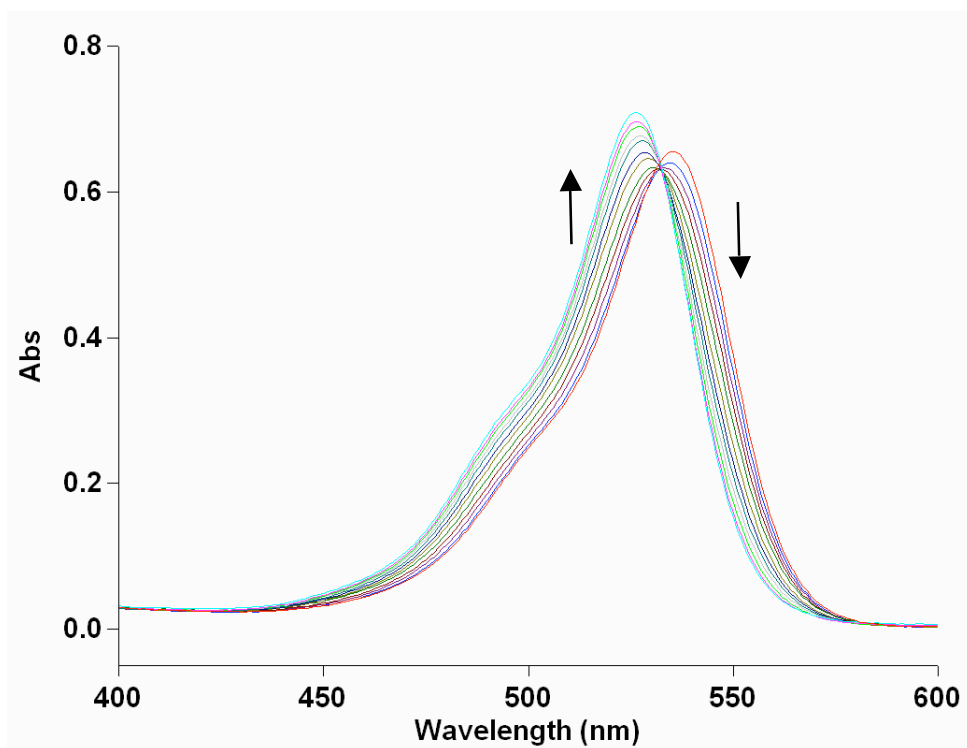

(B)

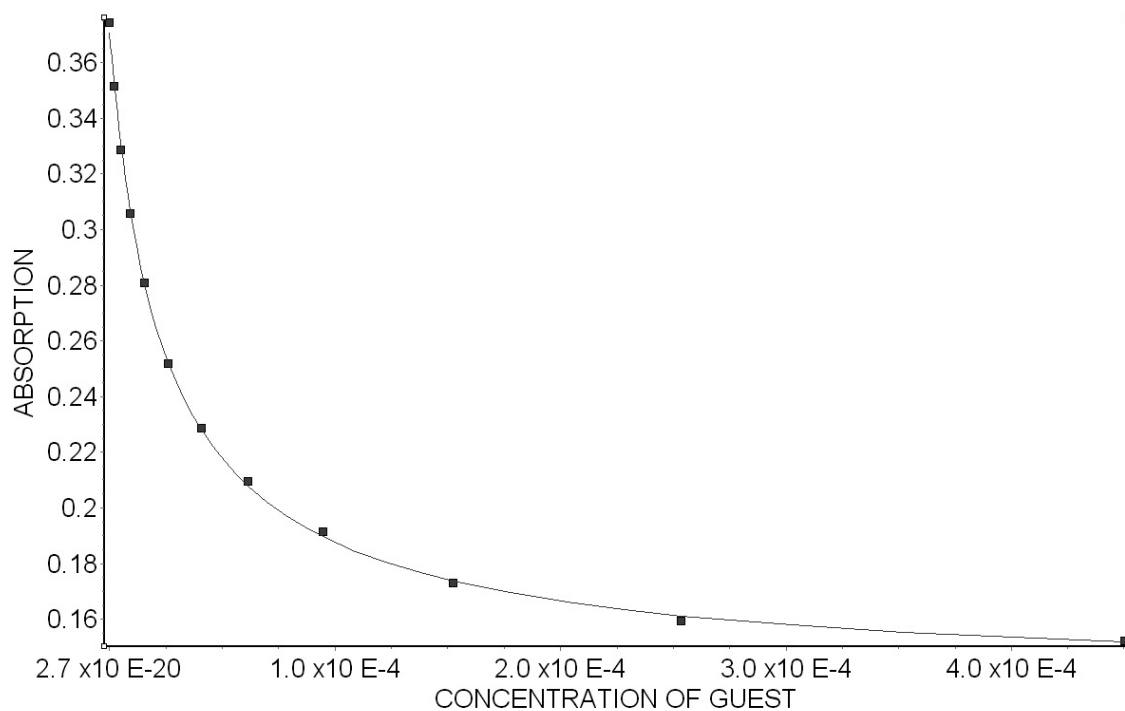

**Figure S17.** (A) UV/Vis spectra from the titration of **2** ( $10.1 \mu\text{M}$ ) and Rhodamine 6G ( $9.96 \mu\text{M}$ ) with guest **26** ( $0 - 450 \mu\text{M}$ ) in  $20 \text{ mM NaH}_2\text{PO}_4$  buffer ( $\text{pH} = 7.4$ ); (B) plot of the  $A_{550}$  as a function of the concentration of **26**. The solid line represents the best non-linear fit of the data to a competitive binding model ( $K_a = (9.8 \pm 0.5) \times 10^5 \text{ M}^{-1}$ ).

(A)

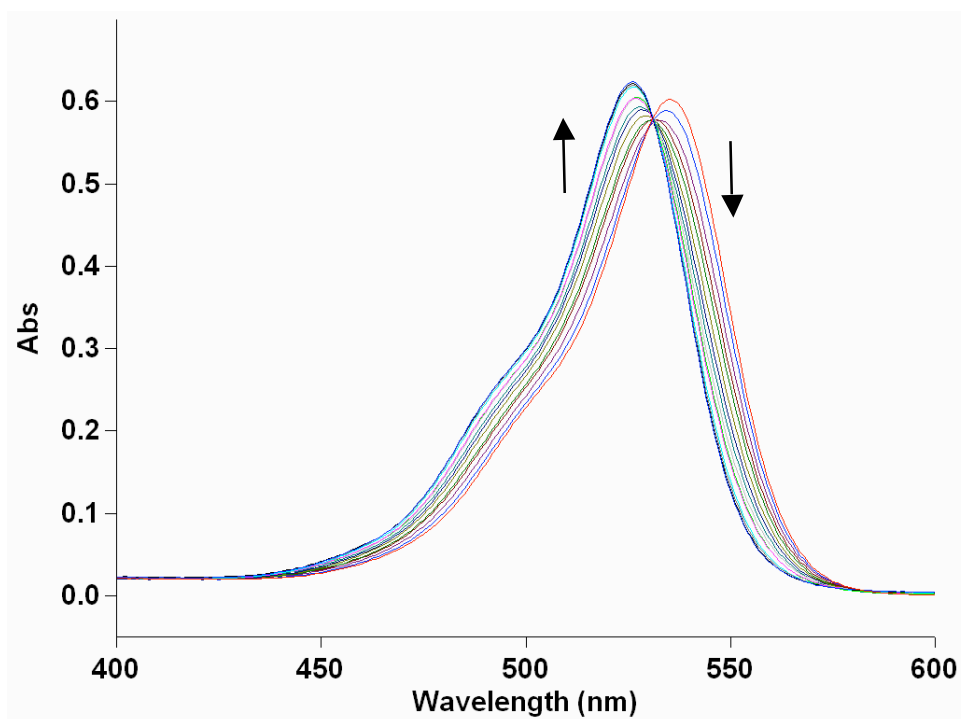

(B)

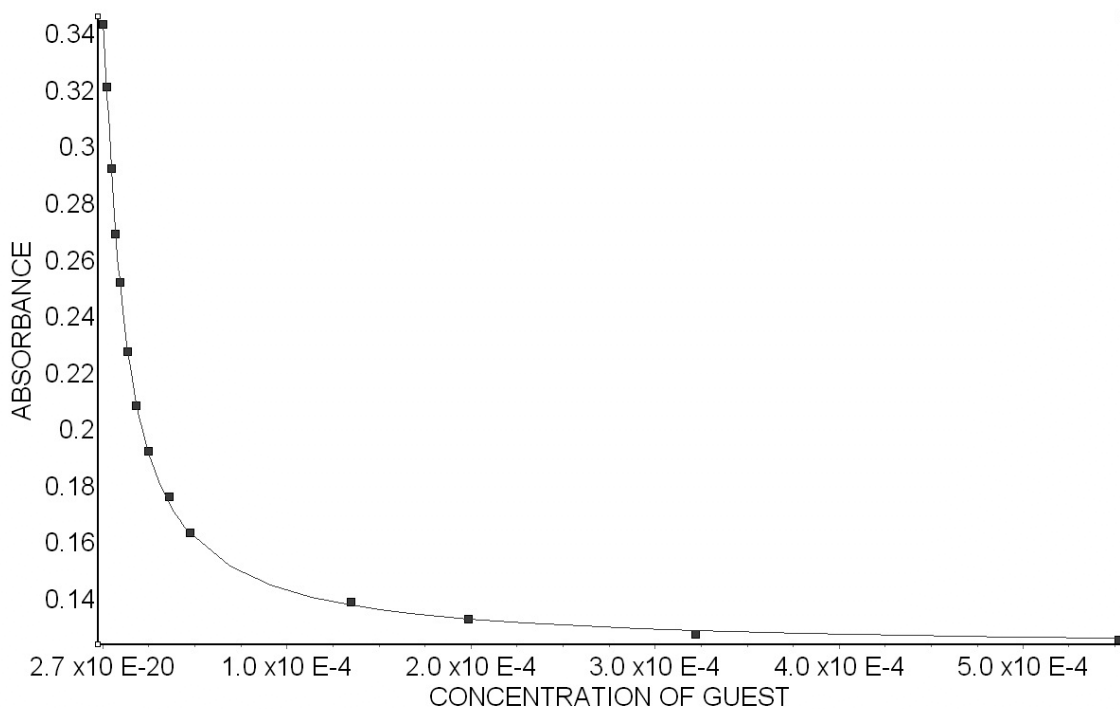

**Figure S18.** (A) UV/Vis spectra from the titration of **2** ( $9.92 \mu\text{M}$ ) and Rhodamine 6G ( $10.0 \mu\text{M}$ ) with guest **27** ( $0 - 552 \mu\text{M}$ ) in 20 mM  $\text{NaH}_2\text{PO}_4$  buffer ( $\text{pH} = 7.4$ ); (B) plot of the  $A_{550}$  as a function of the concentration of **27**. The solid line represents the best non-linear fit of the data to a competitive binding model ( $K_a = (2.8 \pm 0.1) \times 10^6 \text{ M}^{-1}$ ).

(A)

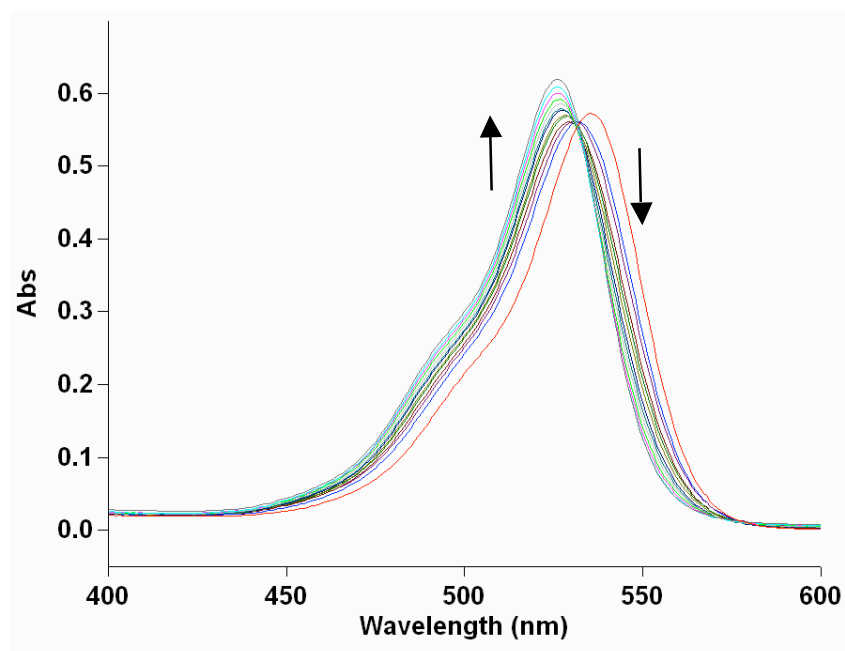

(B)

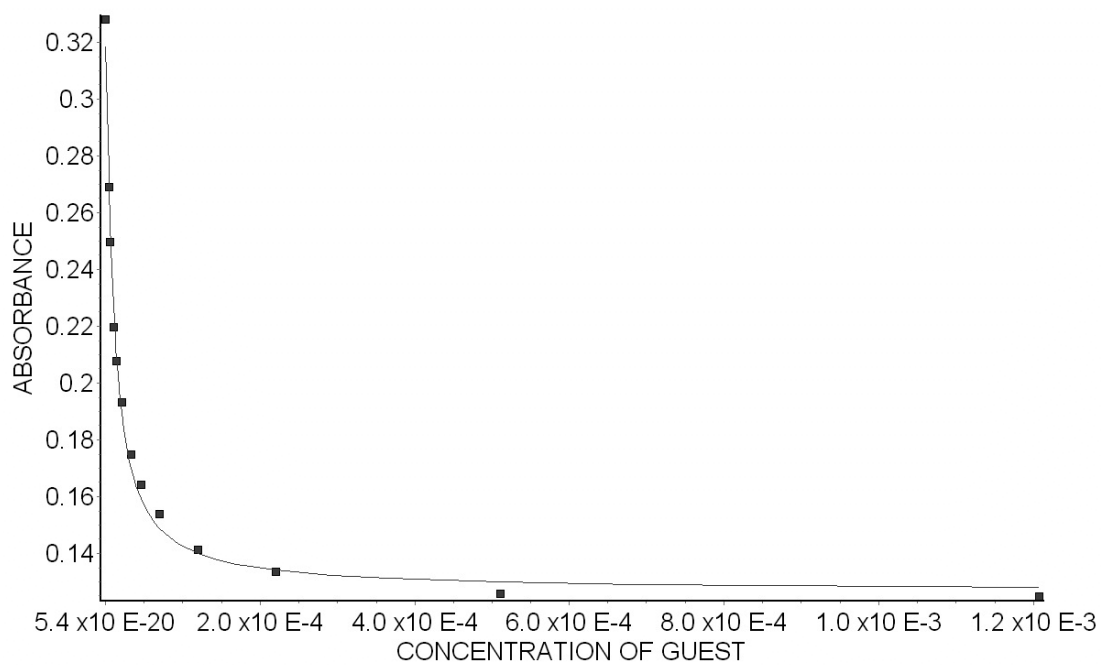

**Figure S19.** (A) UV/Vis spectra from the titration of **2** (9.92 μM) and Rhodamine 6G (10.0 μM) with guest **28** (0 – 1.21 mM) in 20 mM NaH<sub>2</sub>PO<sub>4</sub> buffer (pH = 7.4); (B) plot of the A<sub>550</sub> as a function of the concentration of **28**. The solid line represents the best non-linear fit of the data to a competitive binding model ( $K_a = (3.3 \pm 0.5) \times 10^6 \text{ M}^{-1}$ ).

(A)

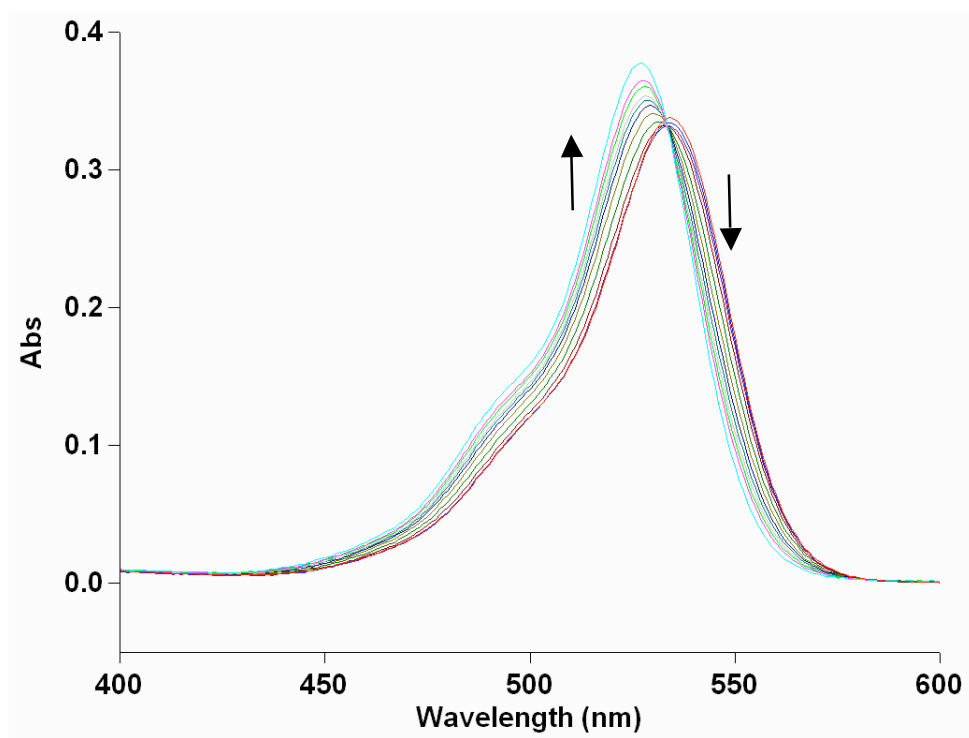

(B)

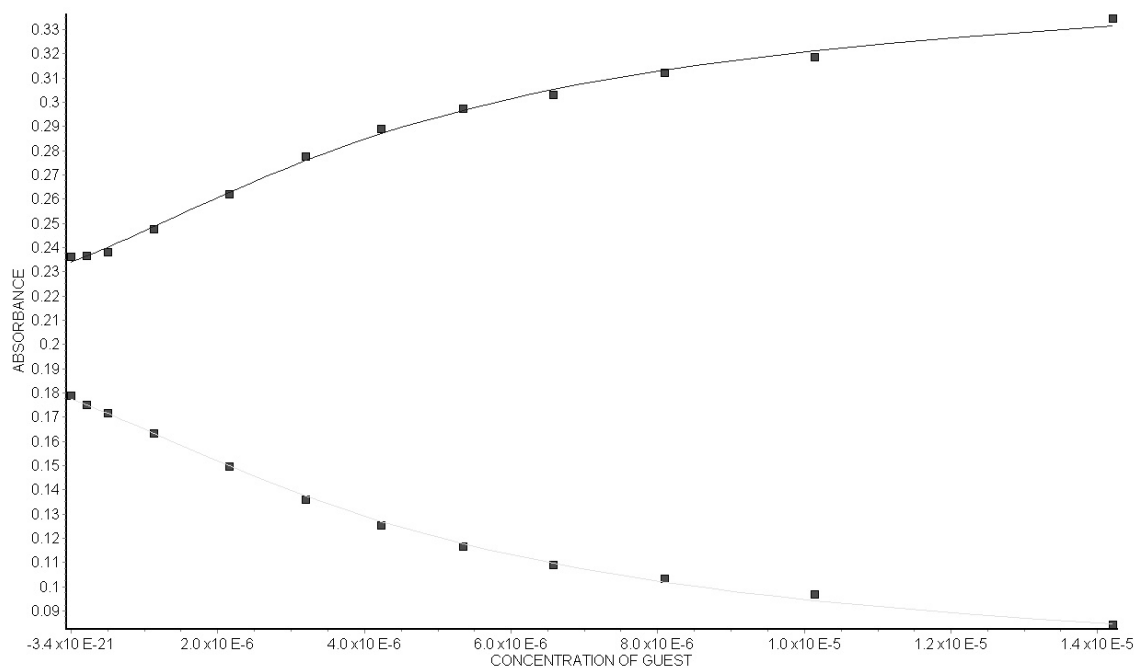

**Figure S20.** (A) UV/Vis spectra from the titration of **2** ( $5.07 \mu\text{M}$ ) and Rhodamine 6G ( $5.01 \mu\text{M}$ ) with guest **29** ( $0 - 14.2 \mu\text{M}$ ) in  $20 \text{ mM NaH}_2\text{PO}_4$  buffer ( $\text{pH} = 7.4$ ); (B) plot of the  $A_{550}$  as a function of the concentration of **29**. The solid line represents the best non-linear fit of the data to a competitive binding model ( $K_a = (4.5 \pm 0.7) \times 10^6 \text{ M}^{-1}$ ).

## ***1:1 Binding Models for NMR***

### ***Model Fitting Absorbance at One Chemical Shift.***

```
// Micromath Scientist Model File
// 1:1 Host:Guest binding model for NMR
//This model assumes the guest concentration is fixed and host concentration is varied
IndVars: ConcHostTot
DepVars: Deltaobs
Params: Ka, ConcGuestTot, Deltasat, Deltazero
Ka = ConcHostGuest/(ConcHostFree*ConcGuestFree)
ConcHostTot=ConcHostFree + ConcHostGuest
ConcGuestTot=ConcGuestFree + ConcHostGuest
Deltaobs = Deltazero + (Deltasat - Deltazero) * (ConcHostGuest/ConcGuestTot)
//Constraints
0 < ConcHostFree < ConcHostTot
0 < Ka
0 < ConcGuestFree < ConcGuestTot
0 < ConcHostGuest < ConcHostTot
***
```

### ***Model Fitting Absorbance at Two Chemical Shifts.***

```
// Micromath Scientist Model File
IndVars: ConcHost
DepVars: CSA, CSB
Params: Ka, CSAzero, CSAsat, CSBzero, CSBsat
Ka = ConcHG/(ConcHfree*ConcGfree)
ConcHost=ConcHfree+ConcHG
0.0001=ConcGfree+ConcHG
CSA = CSAzero + ((CSAsat-CSAzero)*(ConcHG/0.0001))
CSB = CSBzero + ((CSBsat-CSBzero)*(ConcHG/0.0001))
0<ConcHfree<ConcHost
0<ConcGfree<0.0001
```

(A)

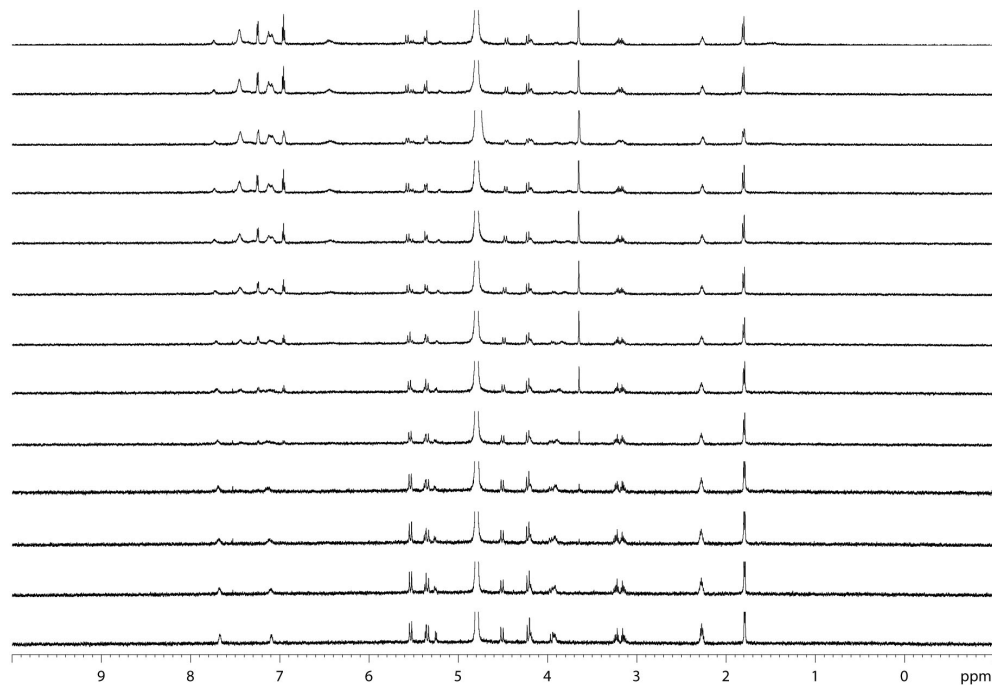

(B)

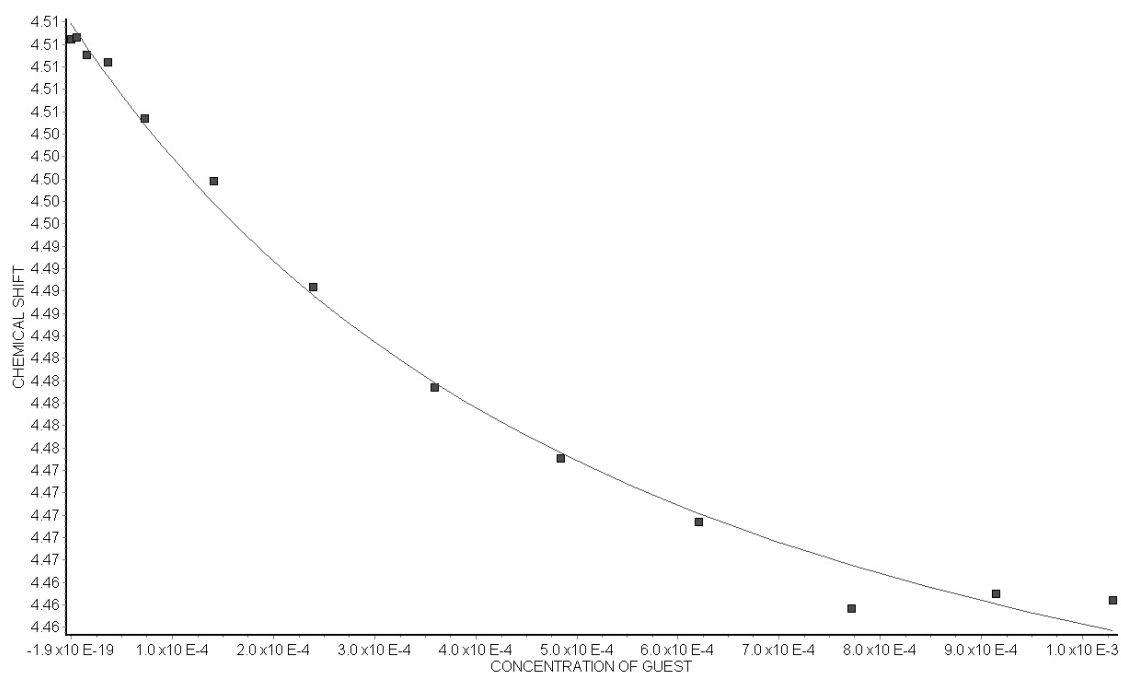

**Figure S21.** (A)  $^1\text{H}$  NMR (600 MHz) stack plot of the titration of **2** (0.104 mM) with guest **3** (0 - 1.03 mM) in 20 mM  $\text{NaH}_2\text{PO}_4$  buffered  $\text{D}_2\text{O}$  (pH = 7.4); (B) plot of the chemical shift at 7.67 ppm as a function of guest concentration. The solid line represents the best non-linear fit of the data to a 1:1 model ( $K_a = (2.0 \pm 0.4) \times 10^3 \text{ M}^{-1}$ ).

(A)

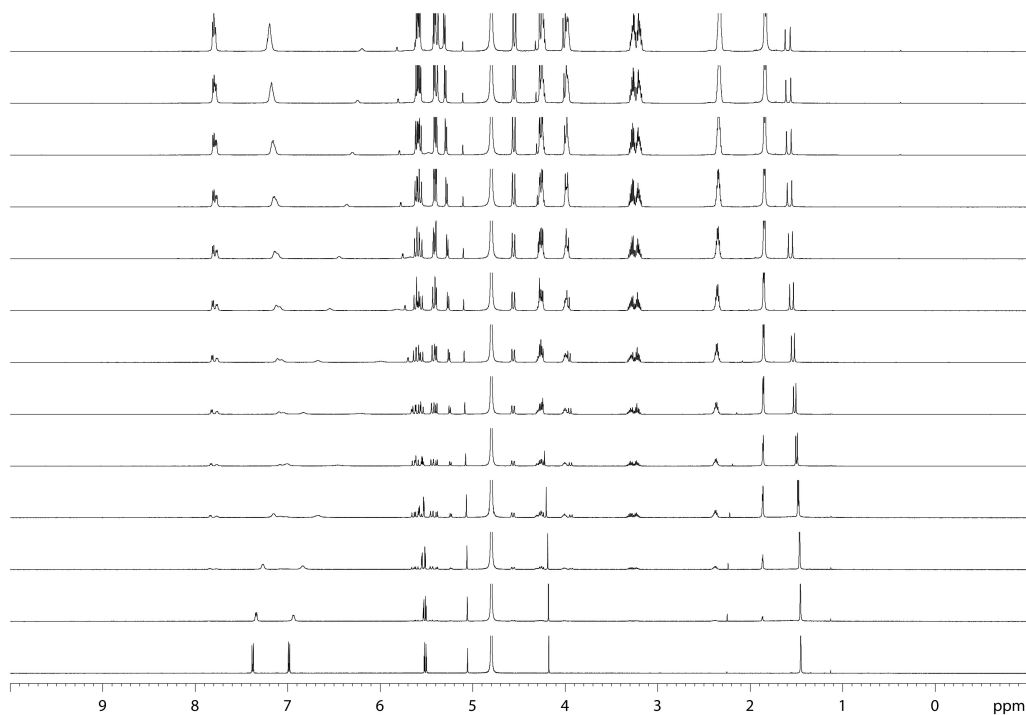

(B)

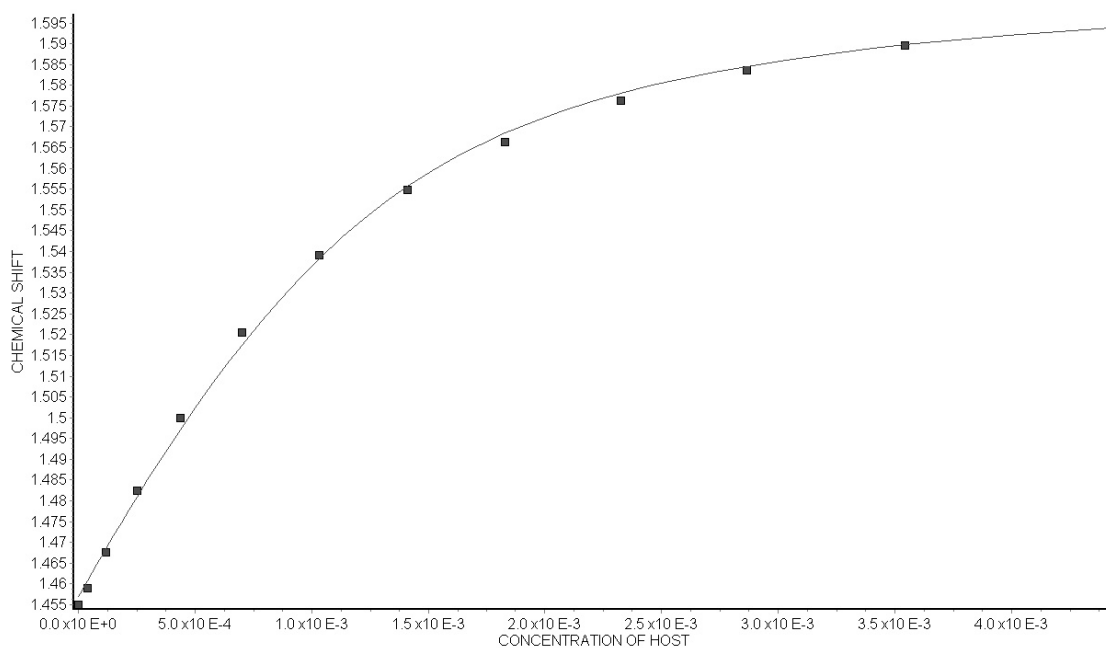

**Figure S22.** (A)  $^1\text{H}$  NMR (600 MHz) stack plot of the titration of **2** (0 - 4.5 mM) with guest **5** (1.86 mM) in 20 mM  $\text{NaH}_2\text{PO}_4$  buffered  $\text{D}_2\text{O}$  (pH = 7.4); (B) plot of the chemical shift at 1.46 ppm as a function of host concentration. The solid line represents the best non-linear fit of the data to a 1:1 model ( $K_a = (3.0 \pm 0.4) \times 10^3 \text{ M}^{-1}$ ).

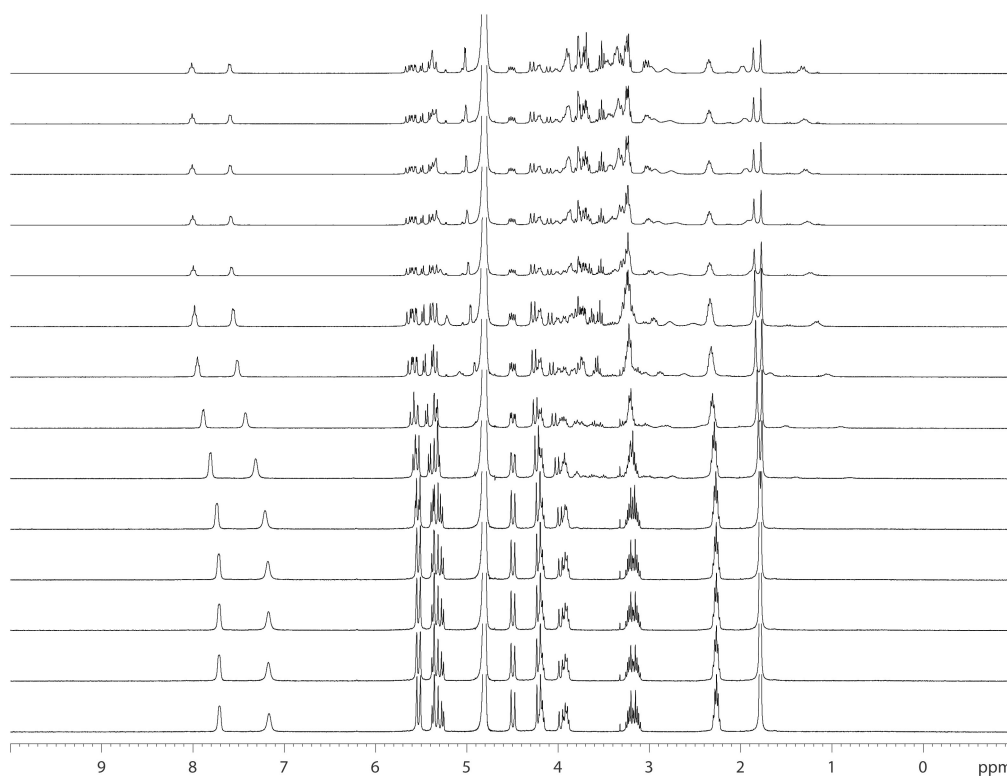

(B)

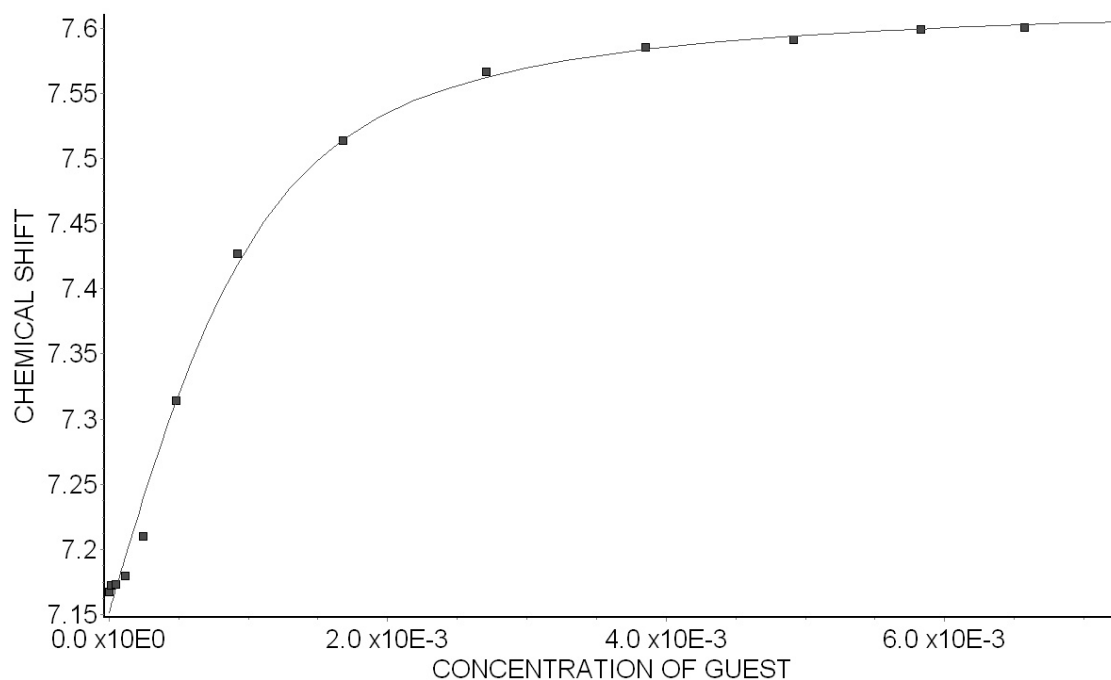

**Figure S23.** (A)  $^1\text{H}$  NMR (400 MHz) stack plot of the titration of **2** (0.976 mM) with guest **6** (0 - 7.24 mM) in 20 mM  $\text{NaH}_2\text{PO}_4$  buffered  $\text{D}_2\text{O}$  (pH = 7.4); (B) plot of the chemical shift at 7.17 ppm as a function of guest concentration. The solid line represents the best non-linear fit of the data to a 1:1 model ( $K_a = (3.0 \pm 0.6) \times 10^3 \text{ M}^{-1}$ ).



(A)

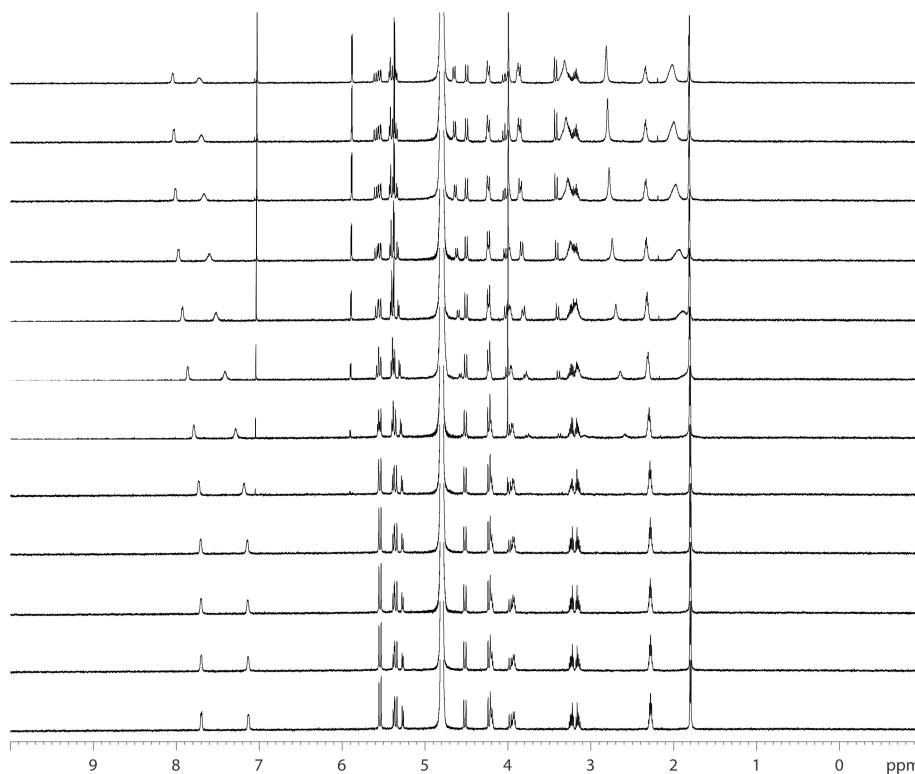

(B)

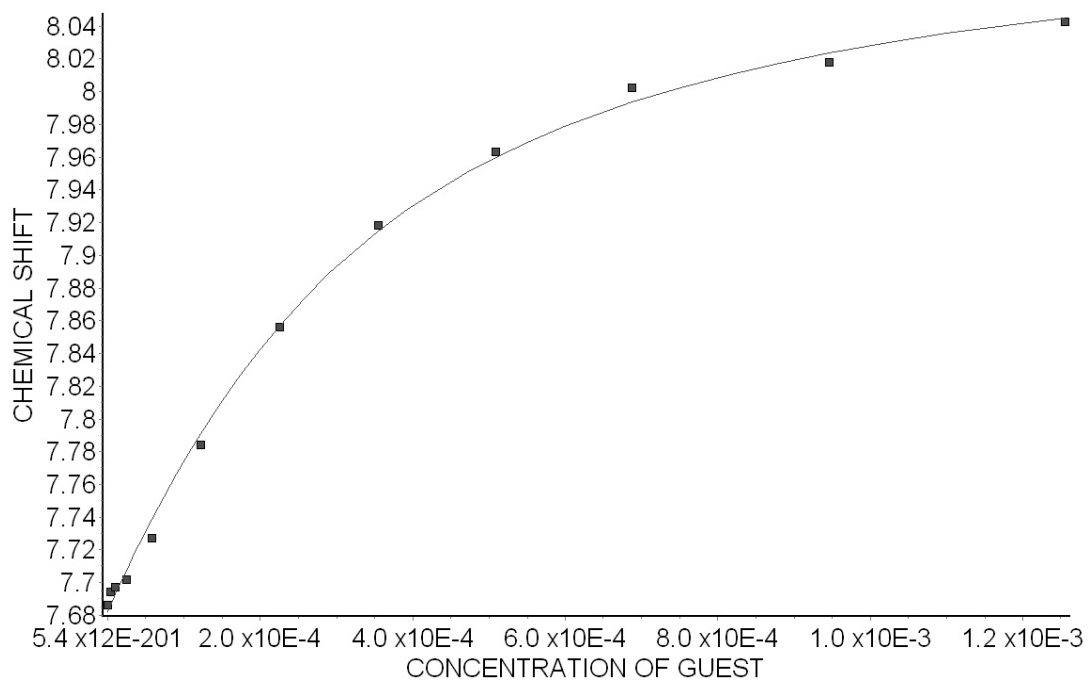

**Figure S24.** (A)  $^1\text{H}$  NMR (600 MHz) stack plot of the titration of **2** (0.199 mM) with guest **7** (0 - 1.26 mM) in 20 mM  $\text{NaH}_2\text{PO}_4$  buffered  $\text{D}_2\text{O}$  (pH = 7.4); (B) plot of the chemical shift at 7.69 ppm as a function of guest concentration. The solid line represents the best non-linear fit of the data to a 1:1 model ( $K_a = (4.6 \pm 0.5) \times 10^3 \text{ M}^{-1}$ ).

(A)

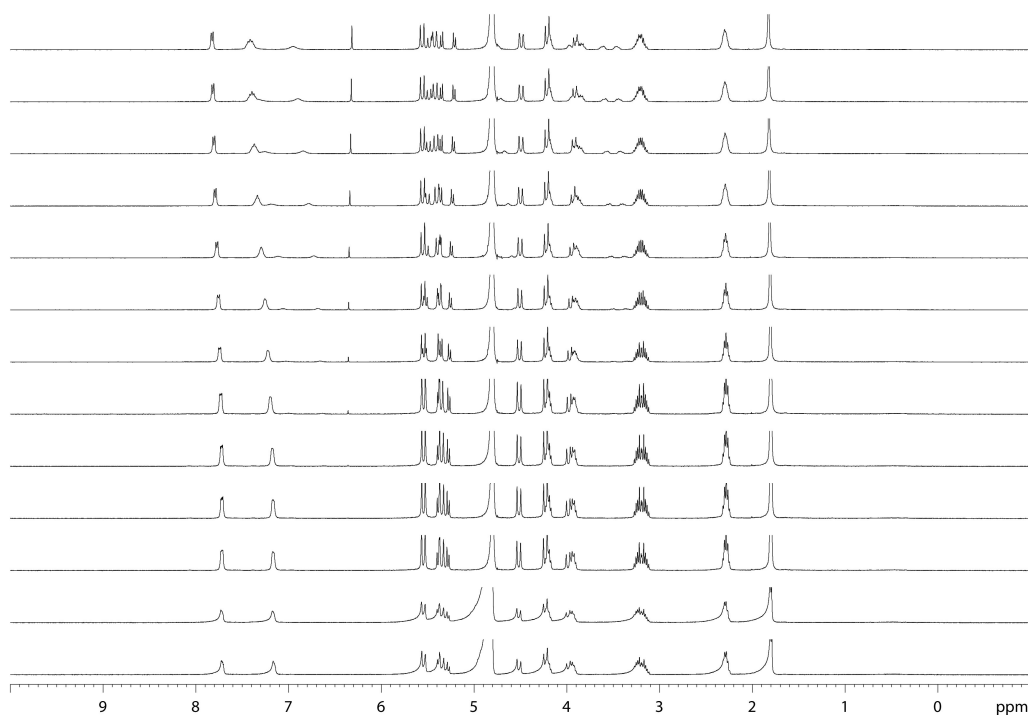

(B)

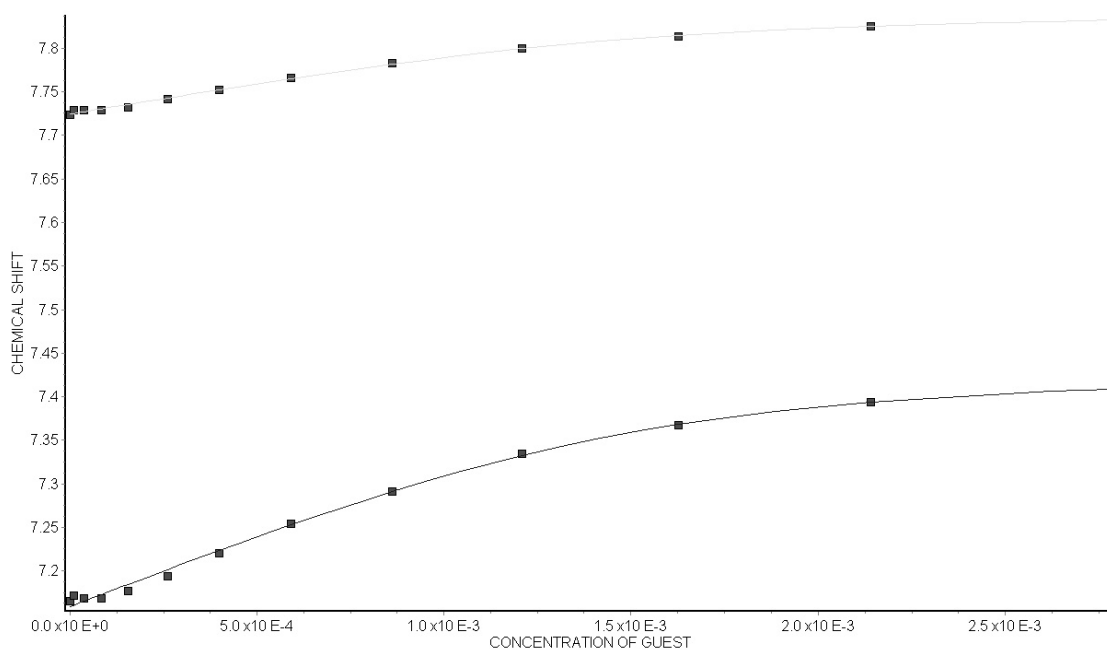

**Figure S25.** (A)  $^1\text{H}$  NMR (600 MHz) stack plot of the titration of **2** (1.50 mM) with guest **9** (0 - 2.7 mM) in 20 mM  $\text{NaH}_2\text{PO}_4$  buffered  $\text{D}_2\text{O}$  (pH = 7.4); (B) plot of the chemical shift at 7.15 and 7.72 ppm as a function of guest concentration. The solid line represents the best non-linear fit of the data to a 1:1 model ( $K_a = (5.9 \pm 1.8) \times 10^3 \text{ M}^{-1}$ ).

(A)

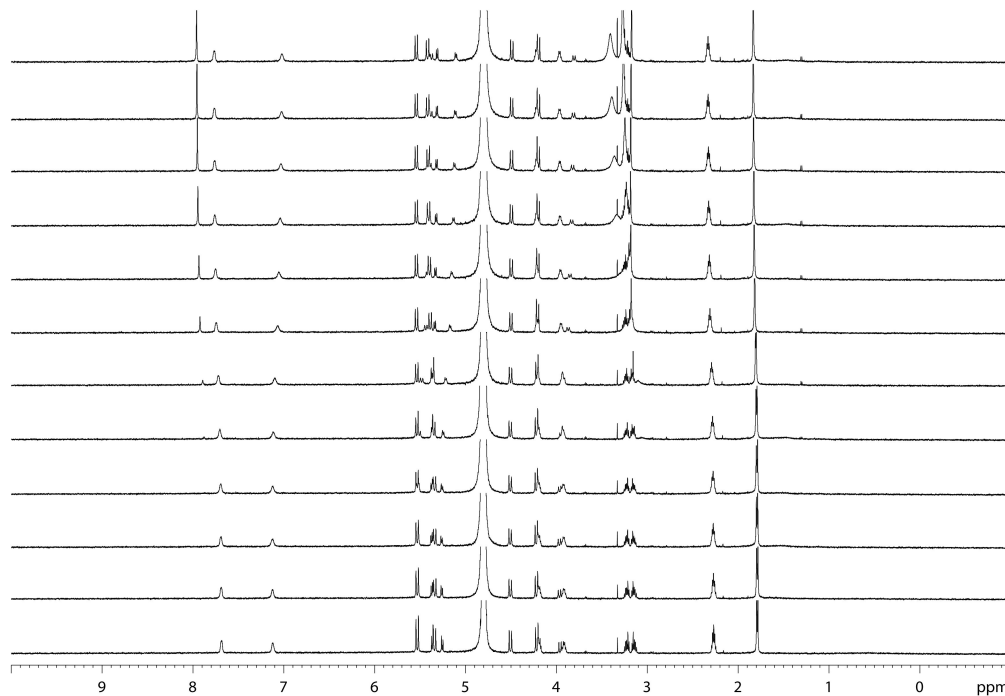

(B)

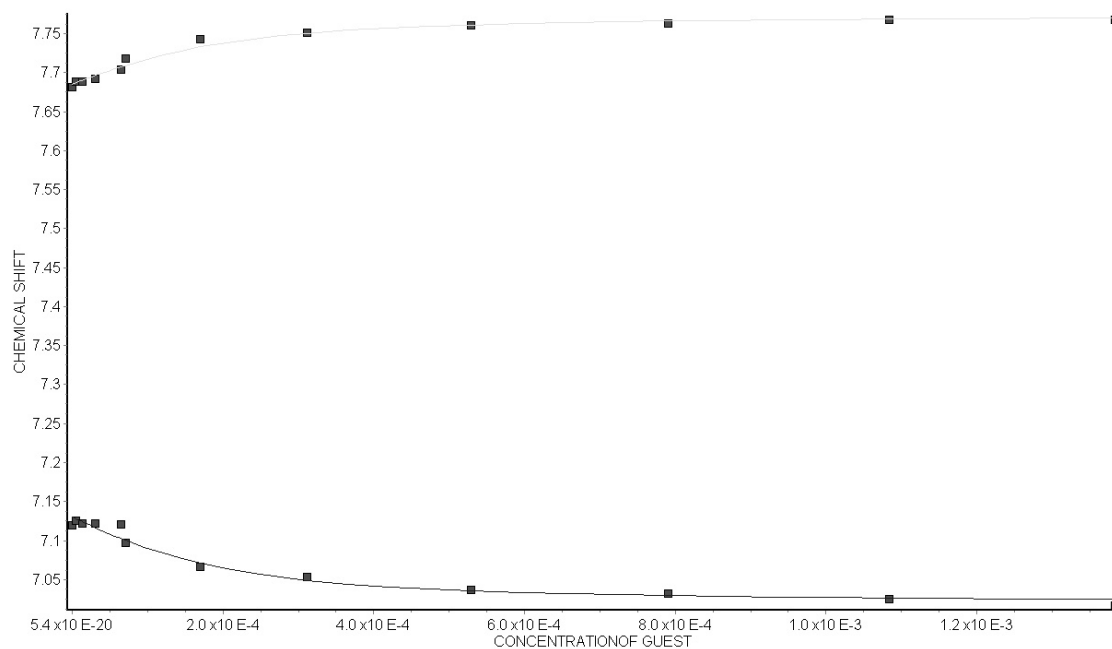

**Figure S26.** (A)  $^1\text{H}$  NMR (600 MHz) stack plot of the titration of **2** (0.150 mM) with guest **11** (0 - 1.3 mM) in 20 mM  $\text{NaH}_2\text{PO}_4$  buffered  $\text{D}_2\text{O}$  (pH = 7.4); (B) plot of the chemical shift at 7.12 and 7.68 ppm as a function of guest concentration. The solid line represents the best non-linear fit of the data to a 1:1 model ( $K_a = (1.4 \pm 0.4) \times 10^4 \text{ M}^{-1}$ ).

(A)

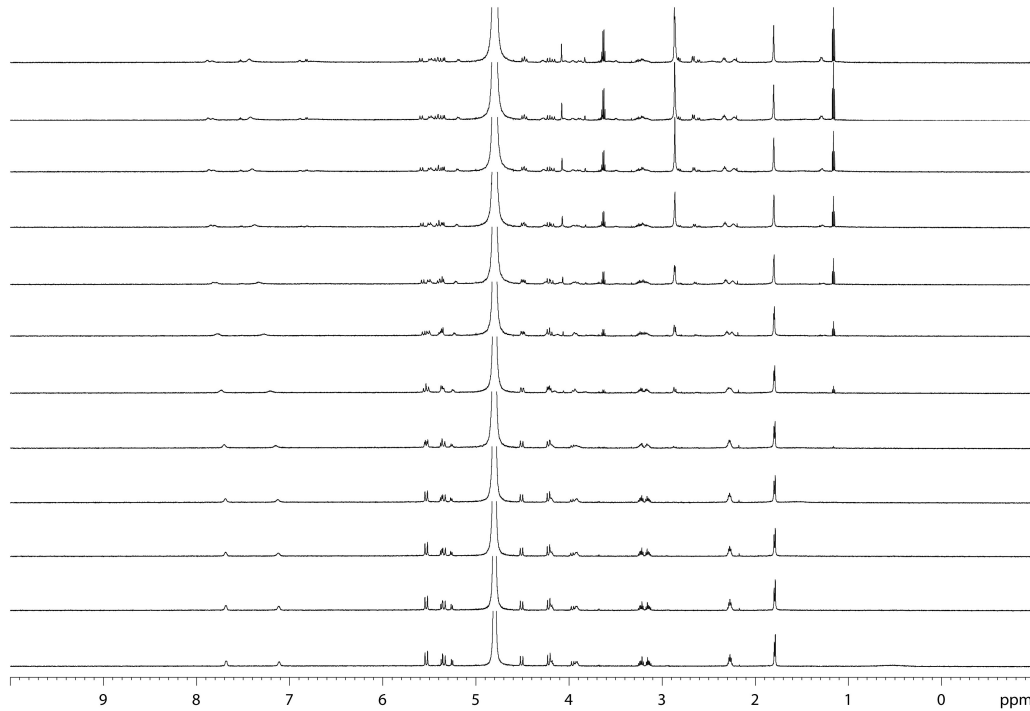

(B)

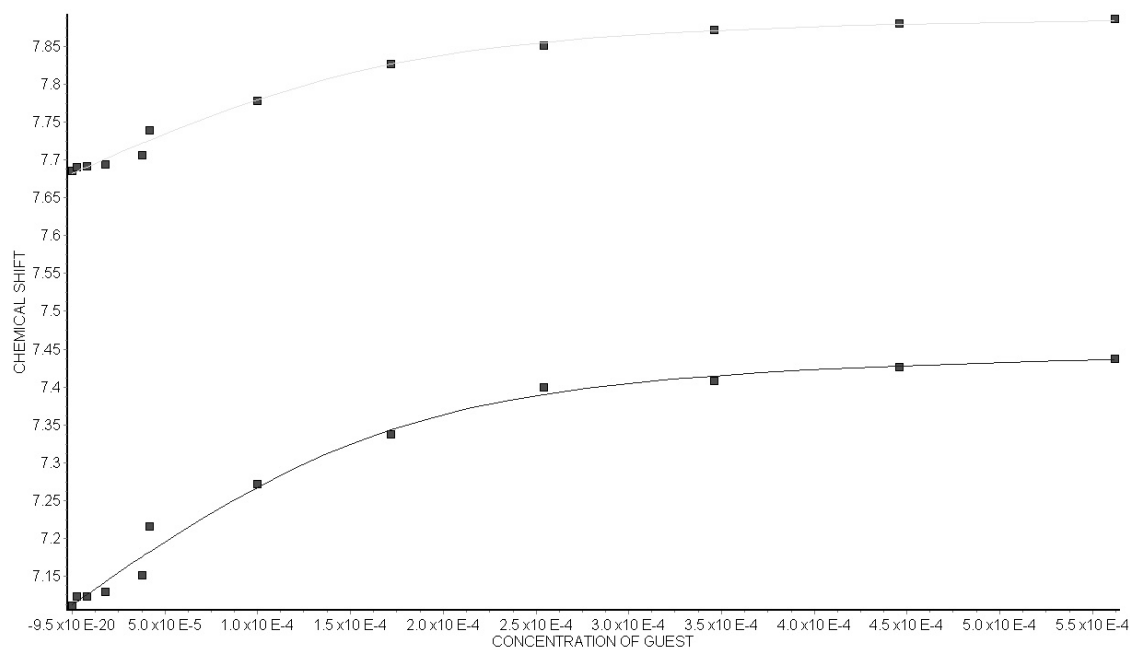

**Figure S27.** (A)  $^1\text{H}$  NMR (600 MHz) stack plot of the titration of **2** (0.150 mM) with guest **13** (0 - 1.26 mM) in 20 mM  $\text{NaH}_2\text{PO}_4$  buffered  $\text{D}_2\text{O}$  (pH = 7.4); (B) plot of the chemical shift at 7.12 and 7.68 ppm as a function of guest concentration. The solid line represents the best non-linear fit of the data to a 1:1 model ( $K_a = (3.3 \pm 1.0) \times 10^4 \text{ M}^{-1}$ ).

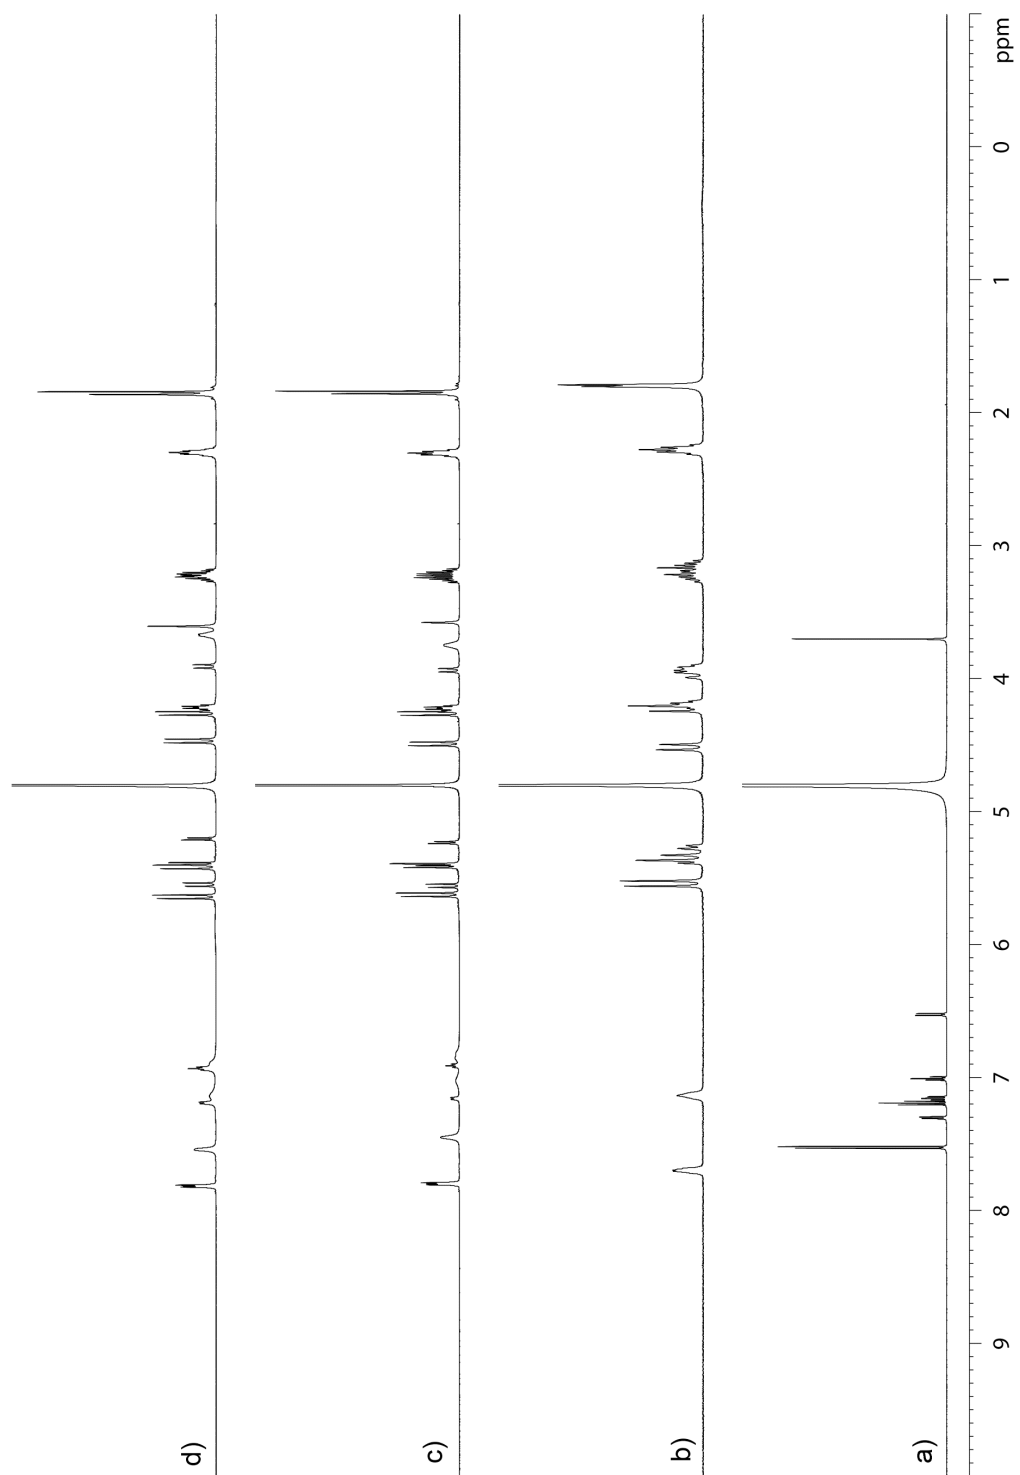

**Figure S28.** <sup>1</sup>H NMR spectra recorded (400 MHz, RT, D<sub>2</sub>O) for a) **3**, b) **2**, c) an equimolar mixture of **2** and **3** (5 mM), and d) a 1:2 mixture of **2** (5 mM) and **3** (10 mM).

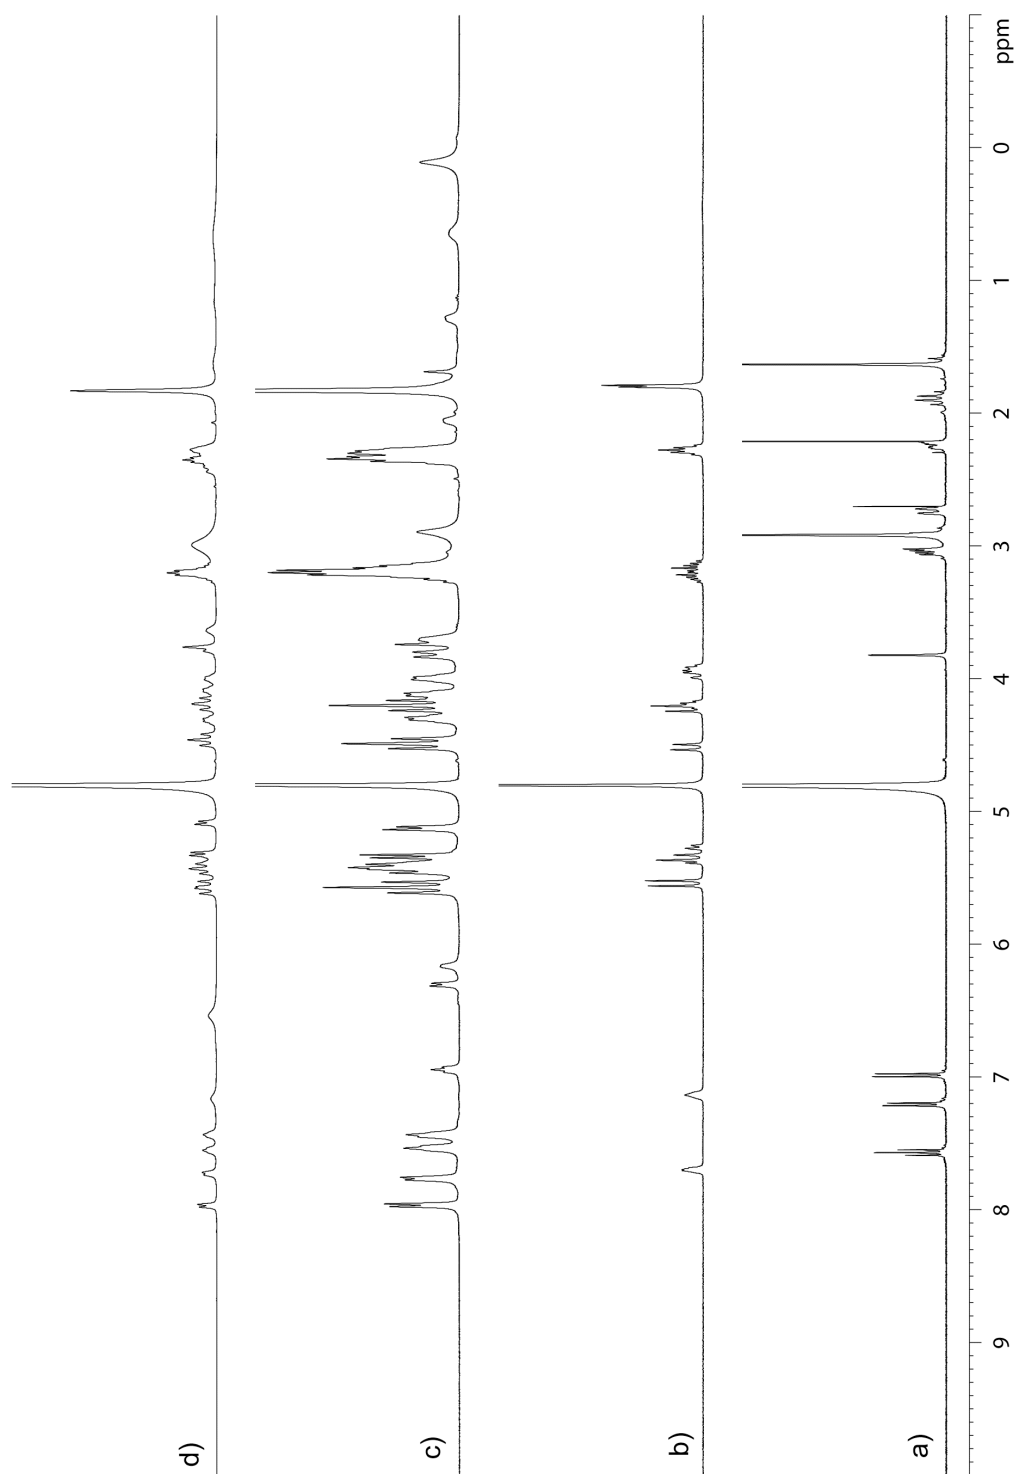

**Figure S29.**  $^1\text{H}$  NMR spectra recorded (400 MHz, RT,  $\text{D}_2\text{O}$ ) for a) **4**, b) **2**, c) an equimolar mixture of **2** and **4** (12.5 mM), and d) a 1:2 mixture of **2** (12.5 mM) and **4** (25 mM).

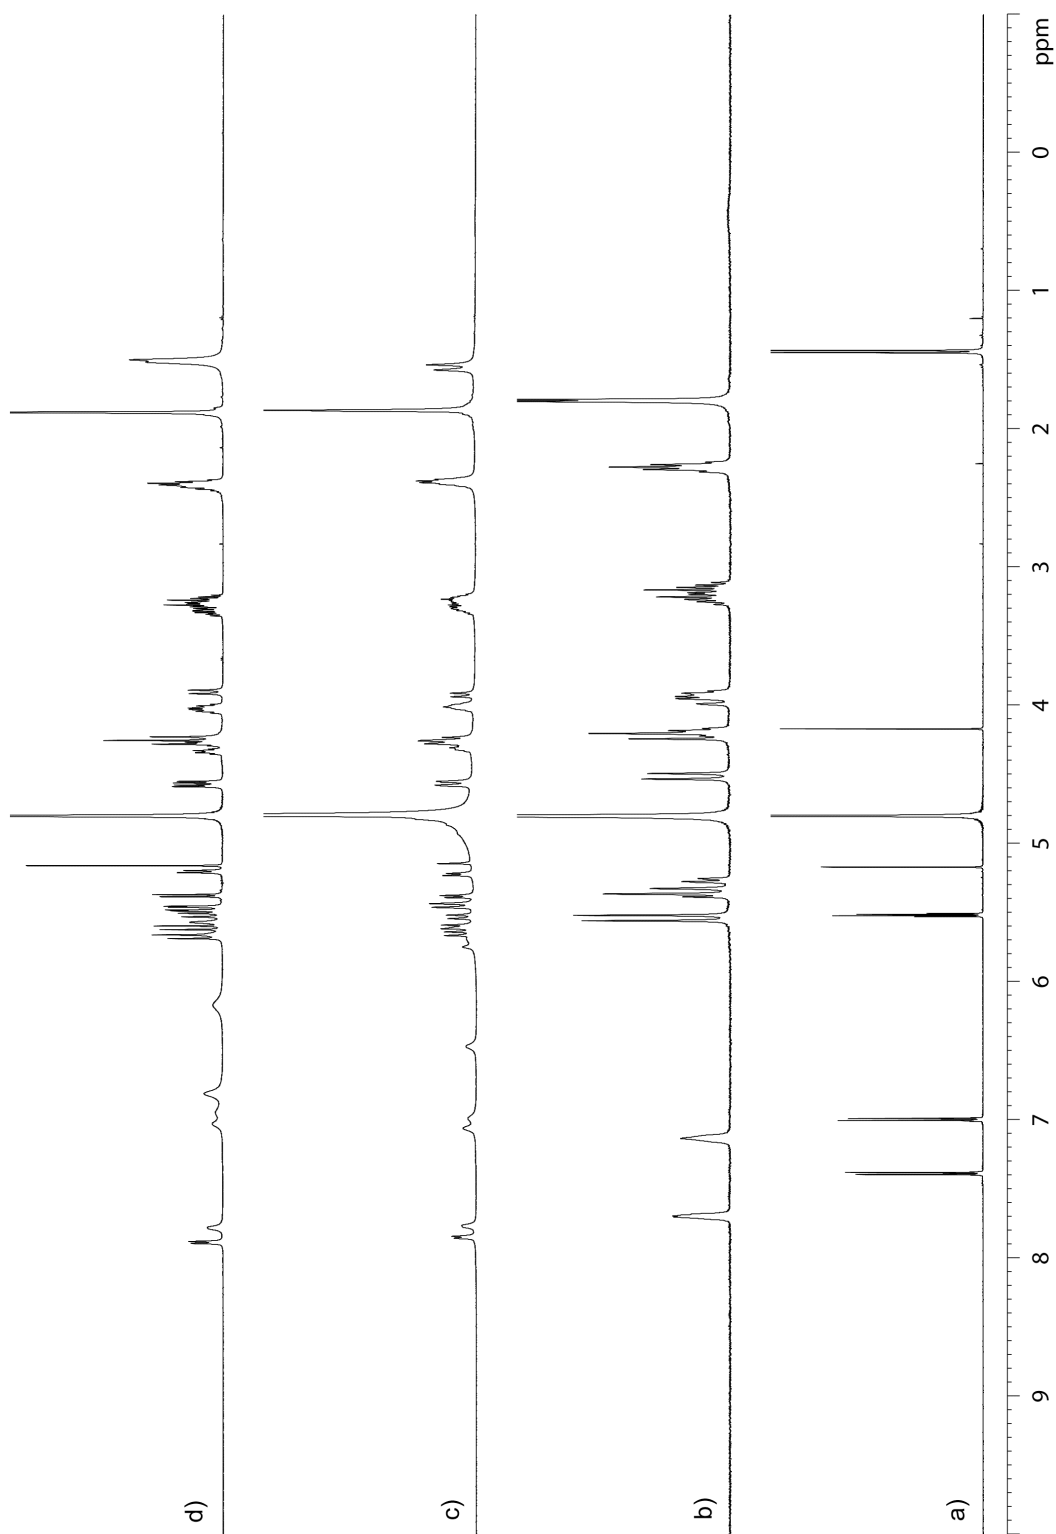

**Figure S30.** <sup>1</sup>H NMR spectra recorded (400 MHz, RT, D<sub>2</sub>O) for a) **5**, b) **2**, c) an equimolar mixture of **2** and **5** (5 mM), and d) a 1:2 mixture of **2** (5 mM) and **5** (10 mM).

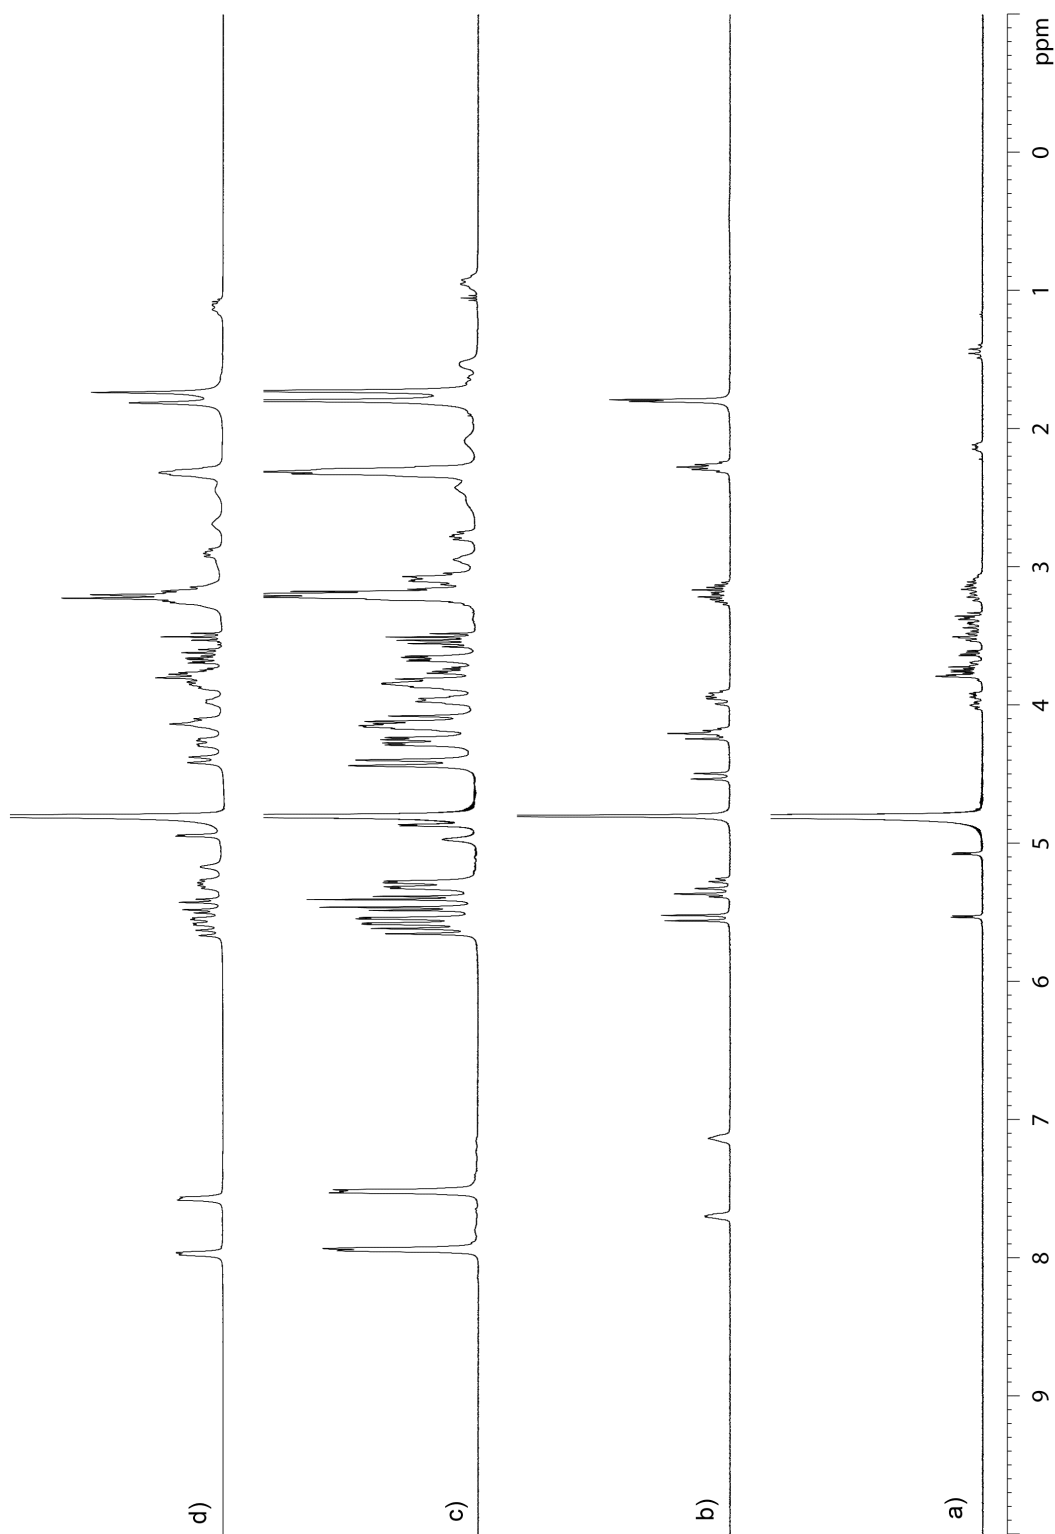

**Figure S31.** <sup>1</sup>H NMR spectra recorded (400 MHz, RT, D<sub>2</sub>O) for a) **6**, b) **2**, c) an equimolar mixture of **2** and **6** (12.5 mM), and d) a 1:2 mixture of **2** (12.5 mM) and **6** (25 mM).



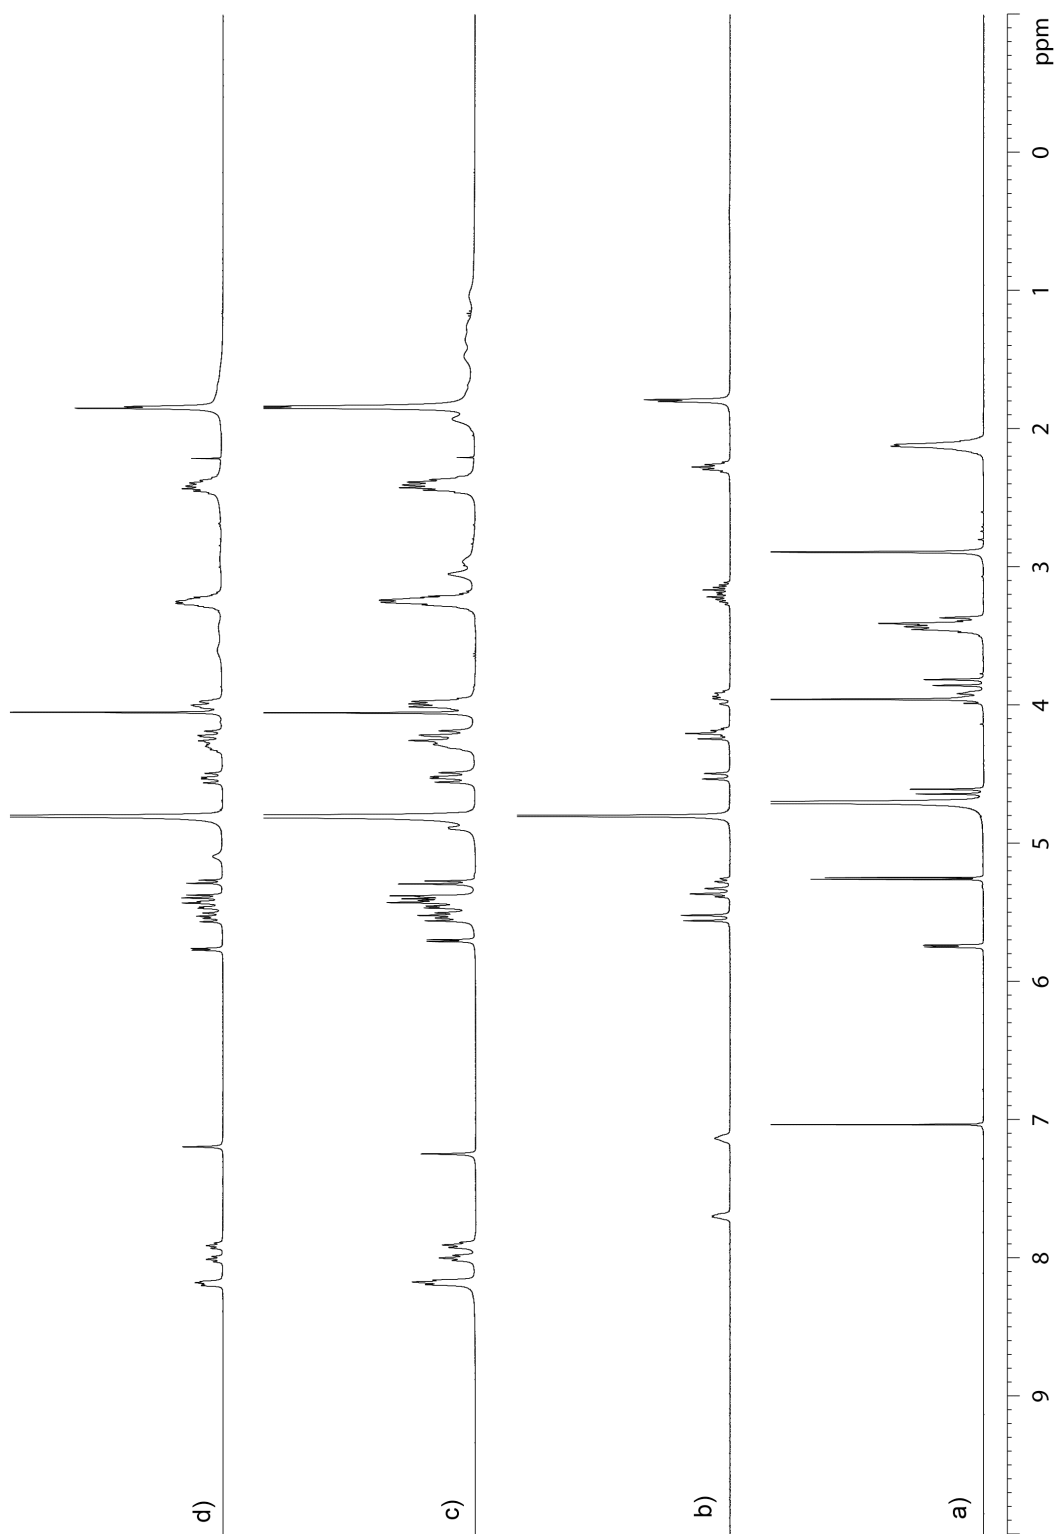

**Figure S32.** <sup>1</sup>H NMR spectra recorded (400 MHz, RT, D<sub>2</sub>O) for a) **7**, b) **2**, c) an equimolar mixture of **2** and **7** (5 mM), and d) a 1:2 mixture of **2** (5 mM) and **7** (10 mM).

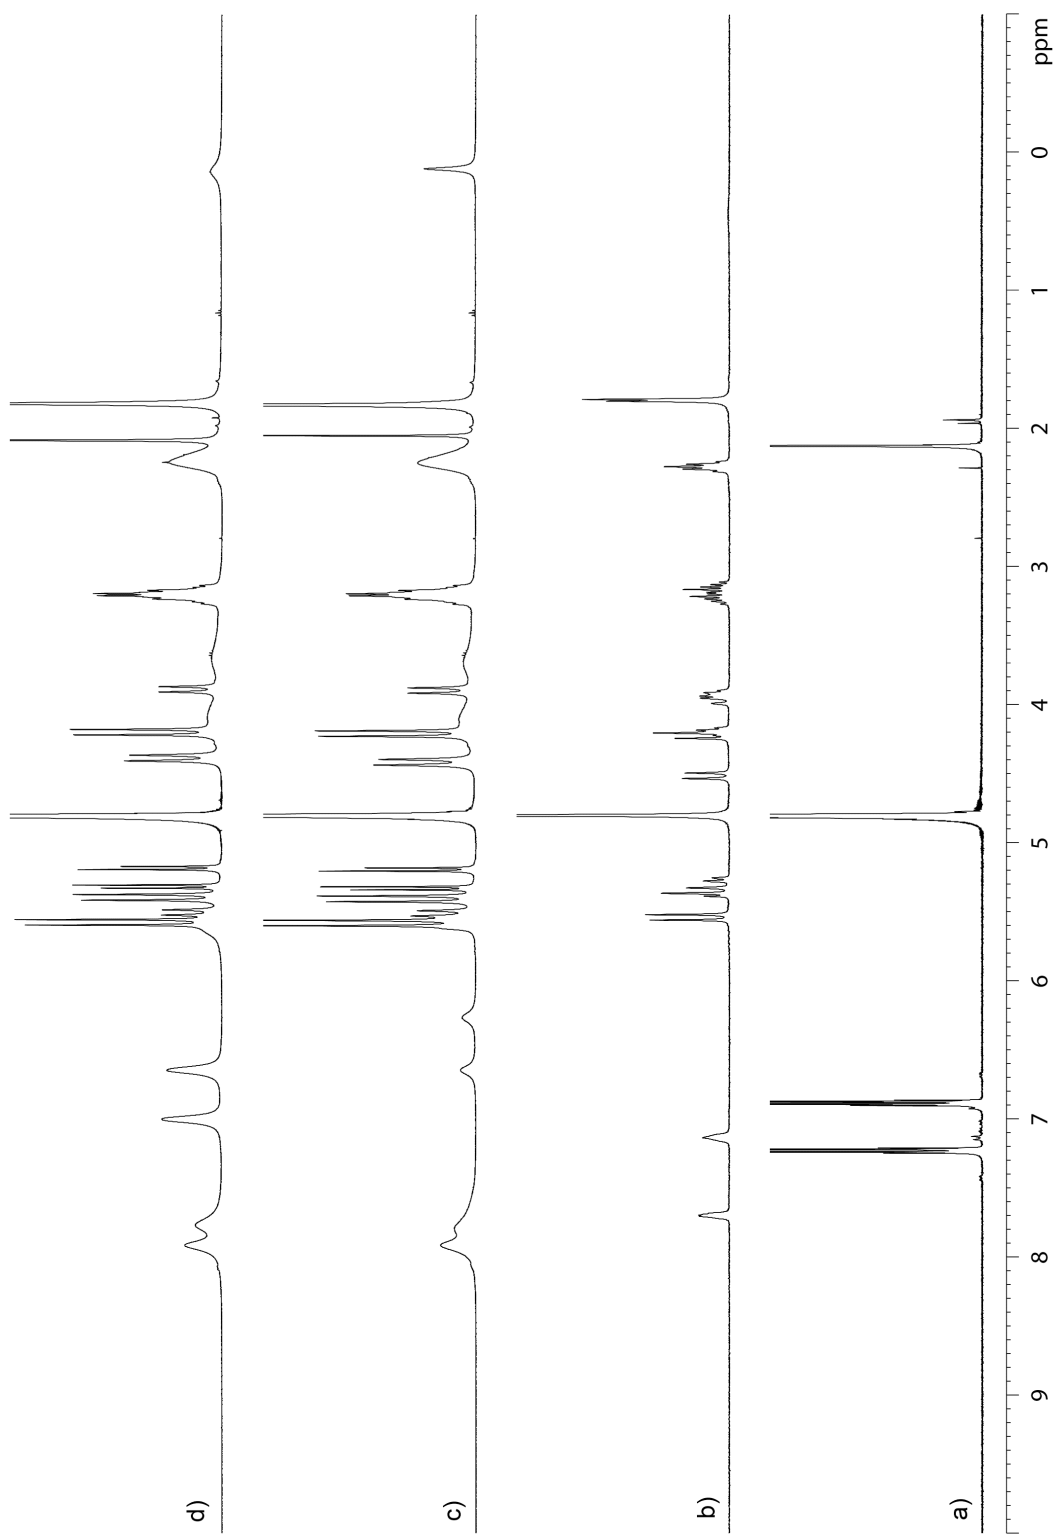

**Figure S33.** <sup>1</sup>H NMR spectra recorded (400 MHz, RT, D<sub>2</sub>O) for a) **8**, b) **2**, c) an equimolar mixture of **2** and **8** (5 mM), and d) a 1:2 mixture of **2** (5 mM) and **8** (10 mM).

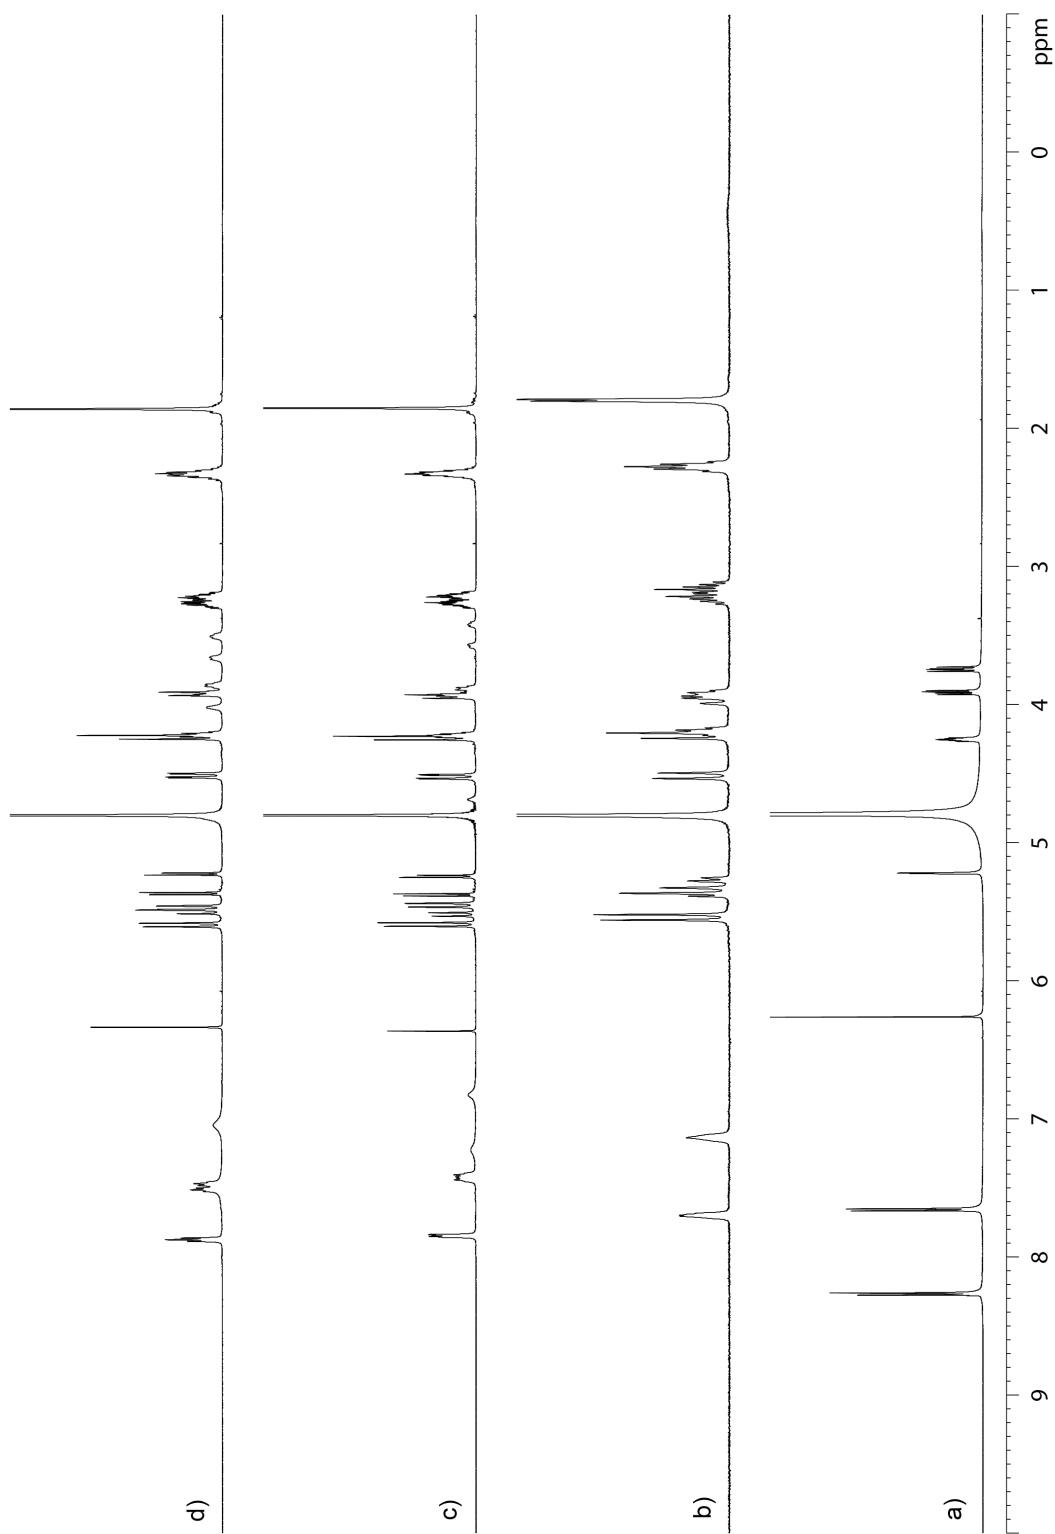

**Figure S34.**  $^1\text{H}$  NMR spectra recorded (400 MHz, RT,  $\text{D}_2\text{O}$ ) for a) **9**, b) **2**, c) an equimolar mixture of **2** and **9** (5 mM), and d) a 1:2 mixture of **2** (5 mM) and **9** (10 mM).

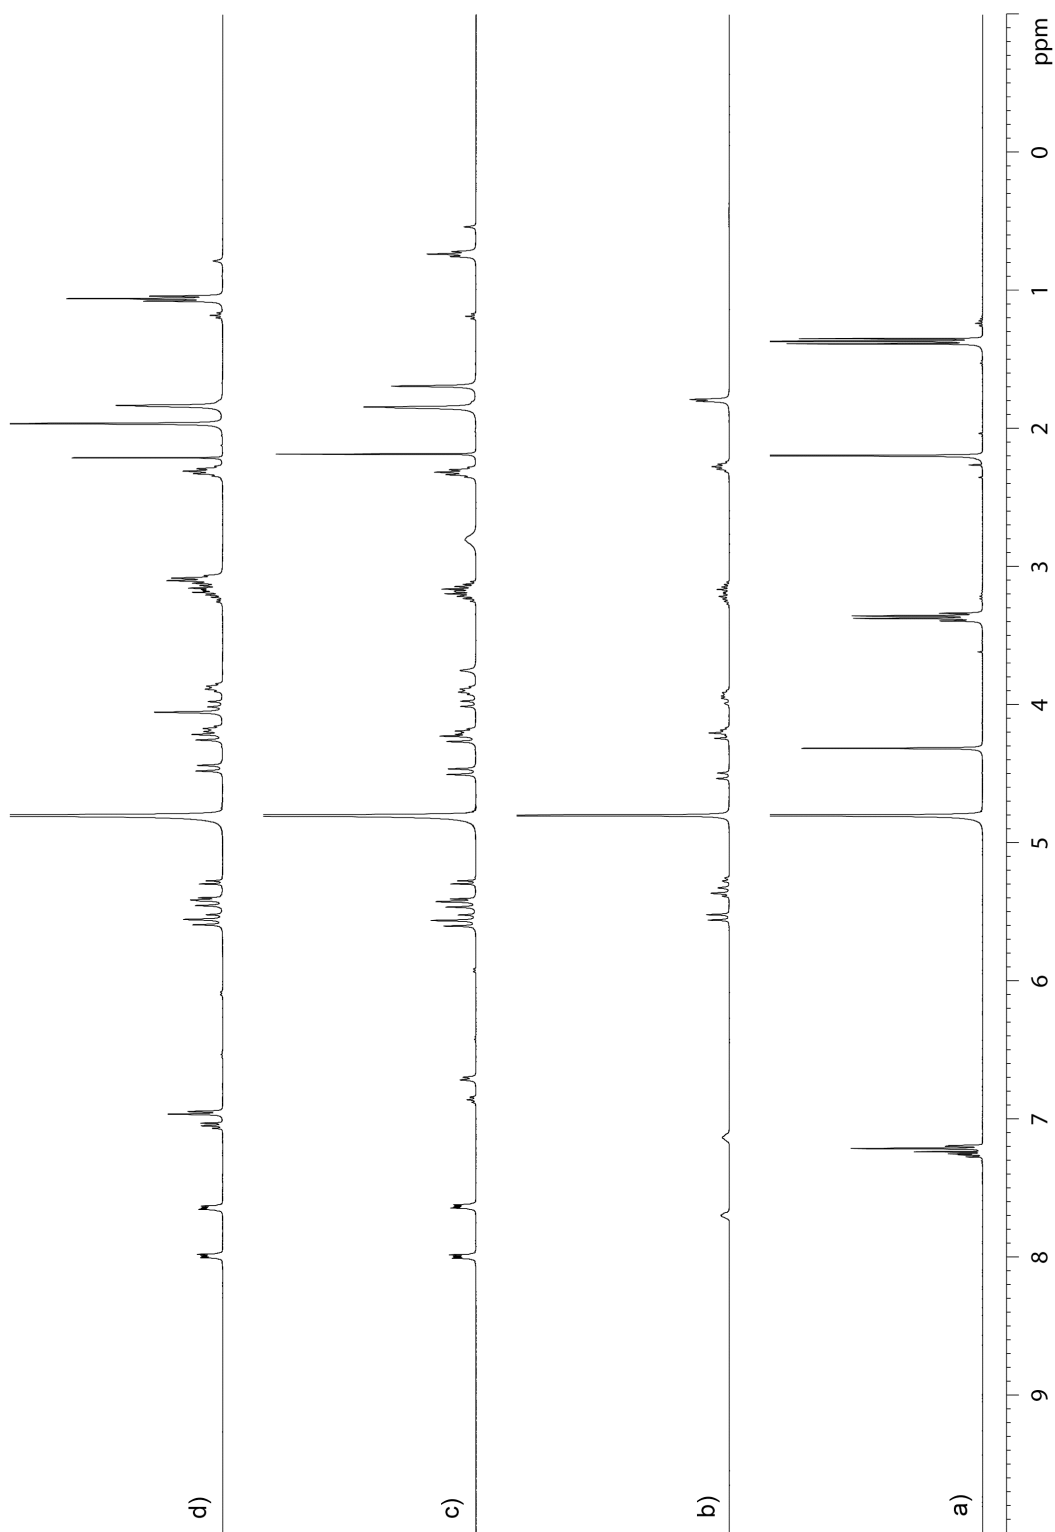

**Figure S35.** <sup>1</sup>H NMR spectra recorded (400 MHz, RT, D<sub>2</sub>O) for a) **10**, b) **2**, c) an equimolar mixture of **2** and **10** (4 mM), and d) a 1:2 mixture of **2** (4 mM) and **10** (8 mM).

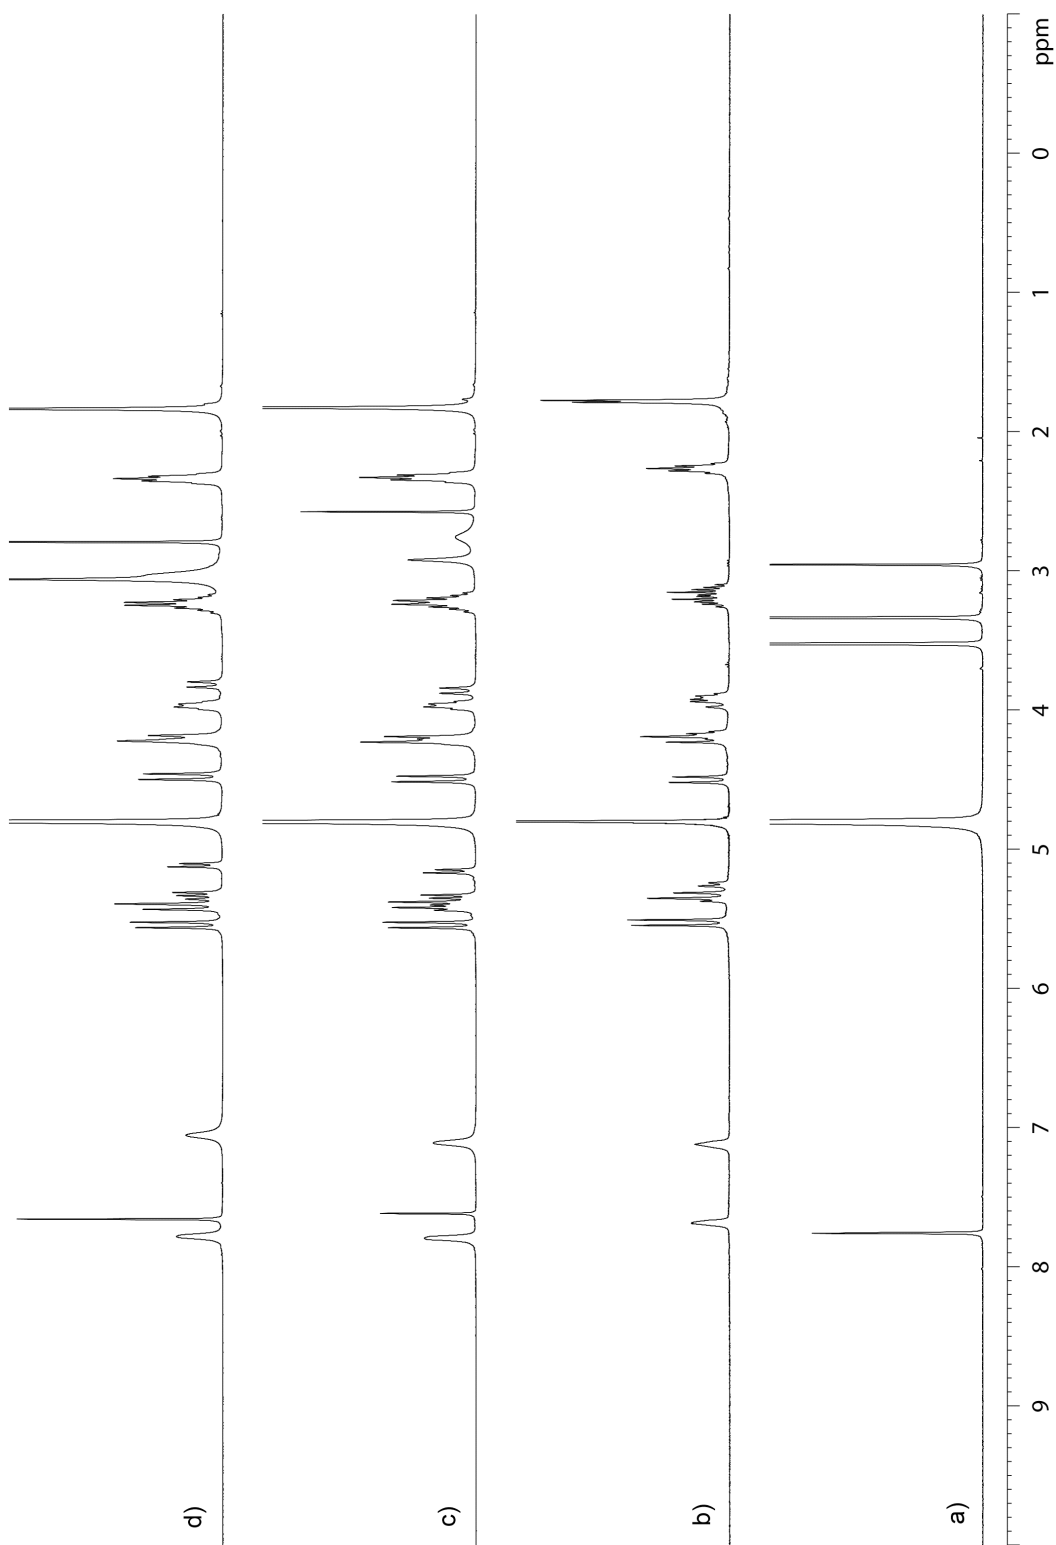

**Figure S36.** <sup>1</sup>H NMR spectra recorded (400 MHz, RT, D<sub>2</sub>O) for a) **11**, b) **2**, c) an equimolar mixture of **2** and **11** (4 mM), and d) a 1:2 mixture of **2** (4 mM) and **11** (8 mM).

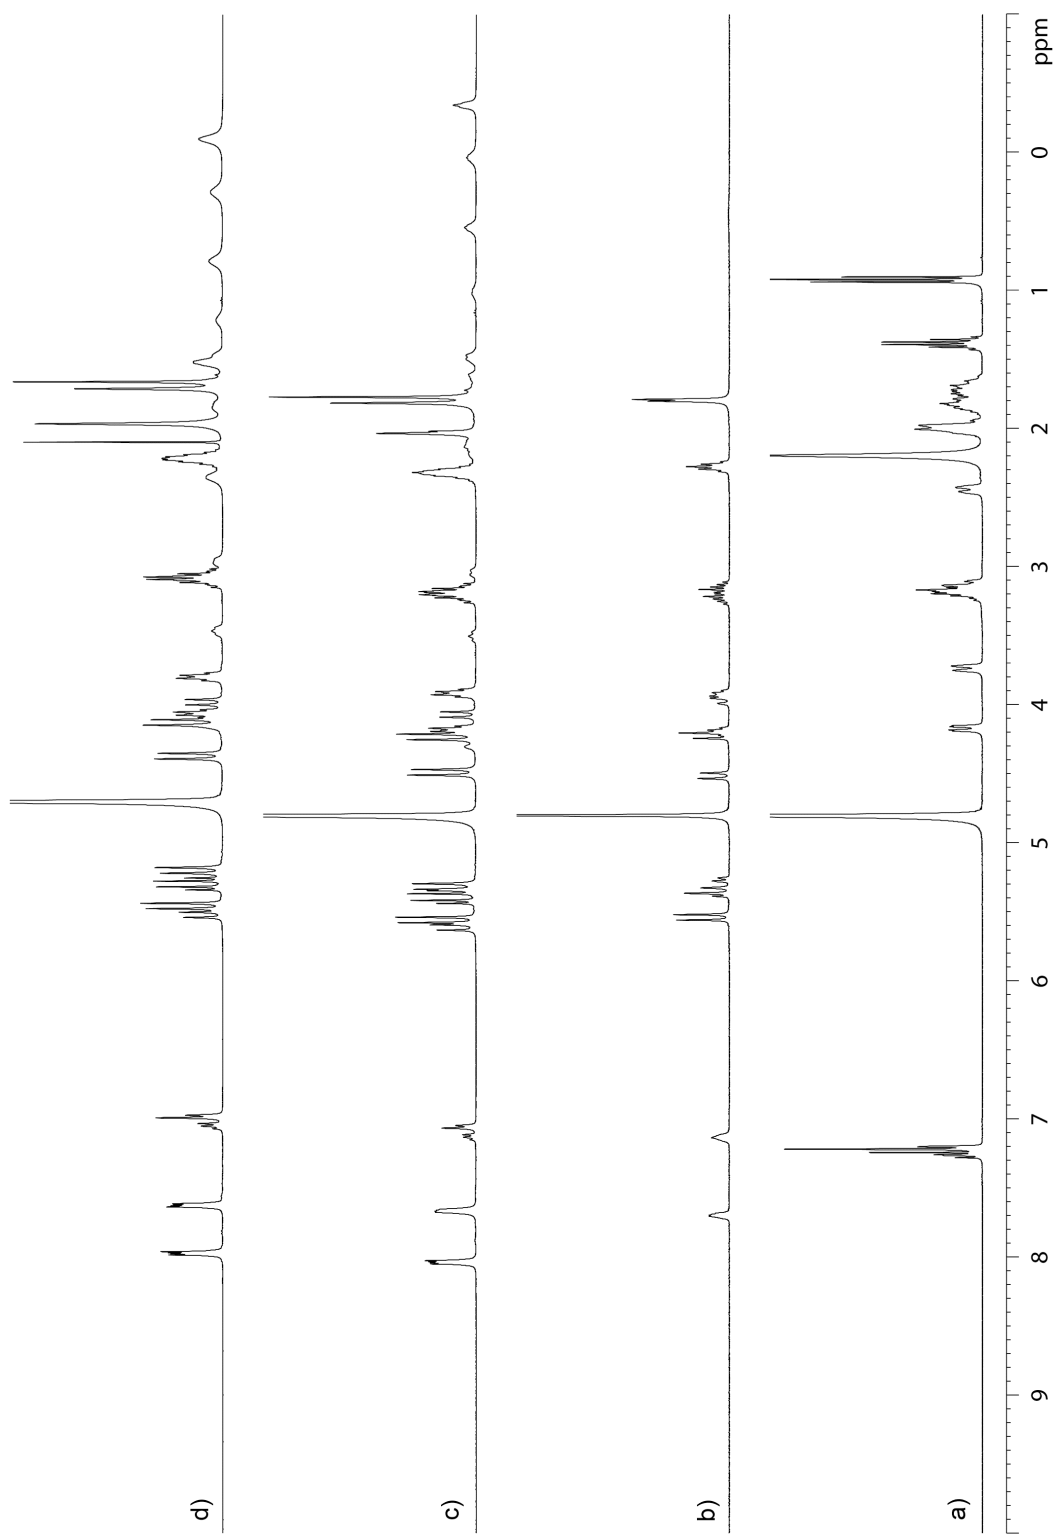

**Figure S37.** <sup>1</sup>H NMR spectra recorded (400 MHz, RT, D<sub>2</sub>O) for a) **12**, b) **2**, c) an equimolar mixture of **2** and **12** (4 mM), and d) a 1:2 mixture of **2** (4 mM) and **12** (8 mM).

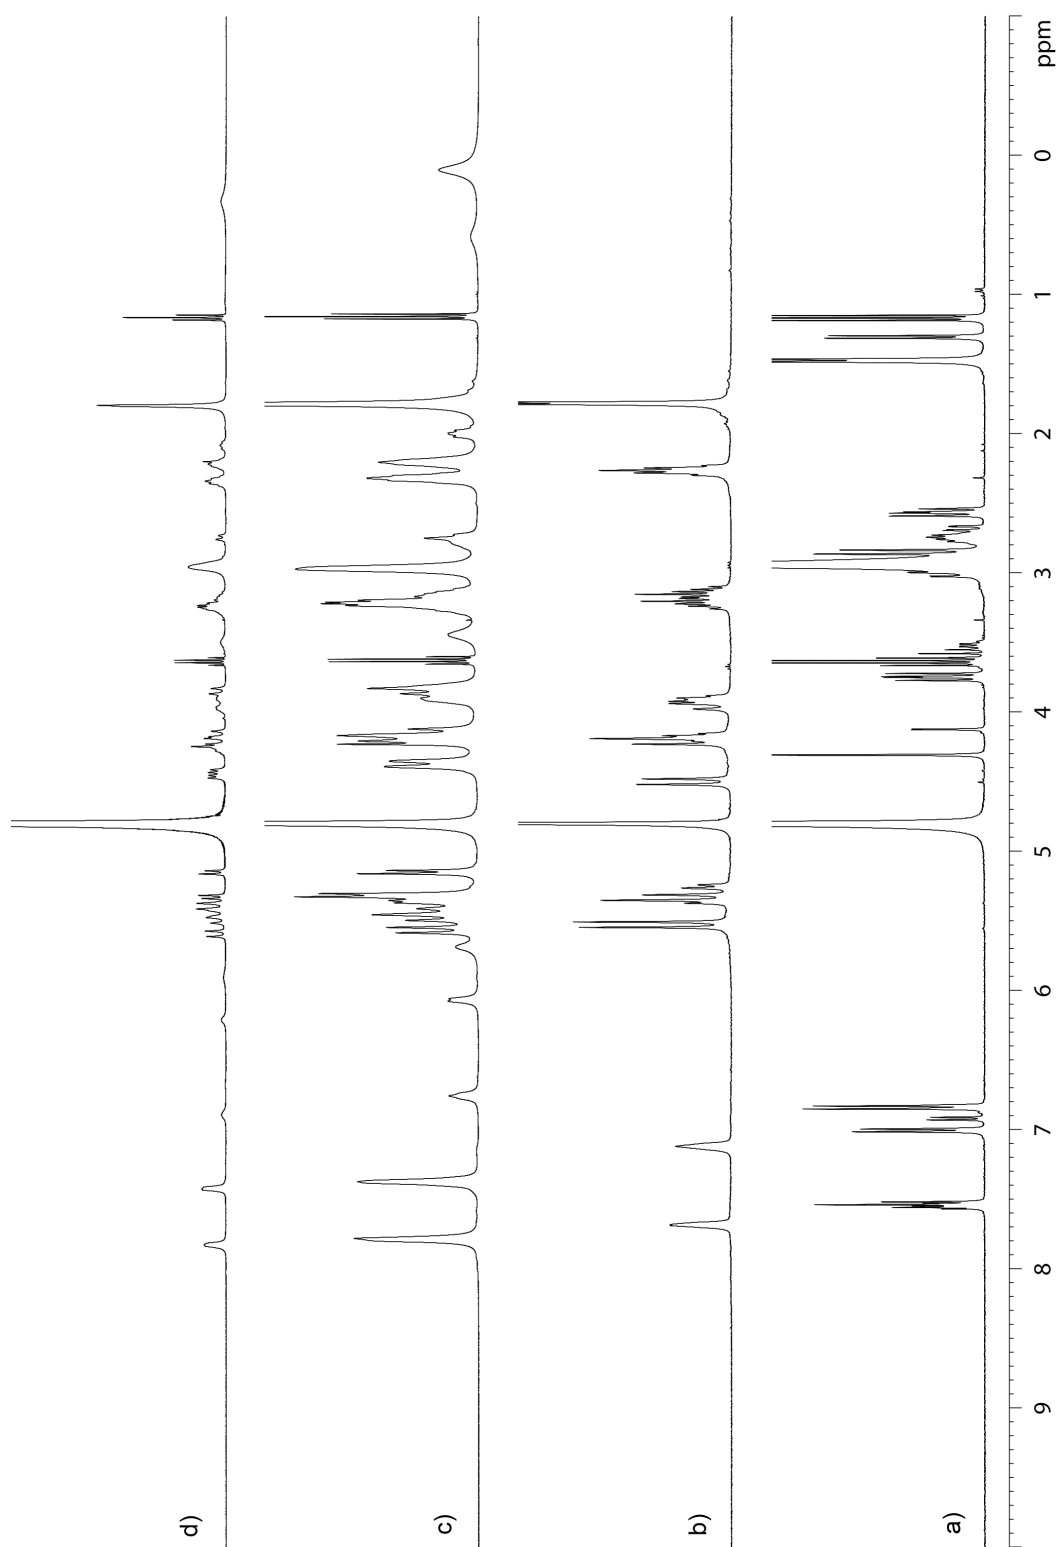

**Figure S38.** <sup>1</sup>H NMR spectra recorded (400 MHz, RT, D<sub>2</sub>O) for a) **13**, b) **2**, c) an equimolar mixture of **2** and **13** (12.5 mM), and d) a 1:2 mixture of **2** (4 mM) and **13** (8 mM).

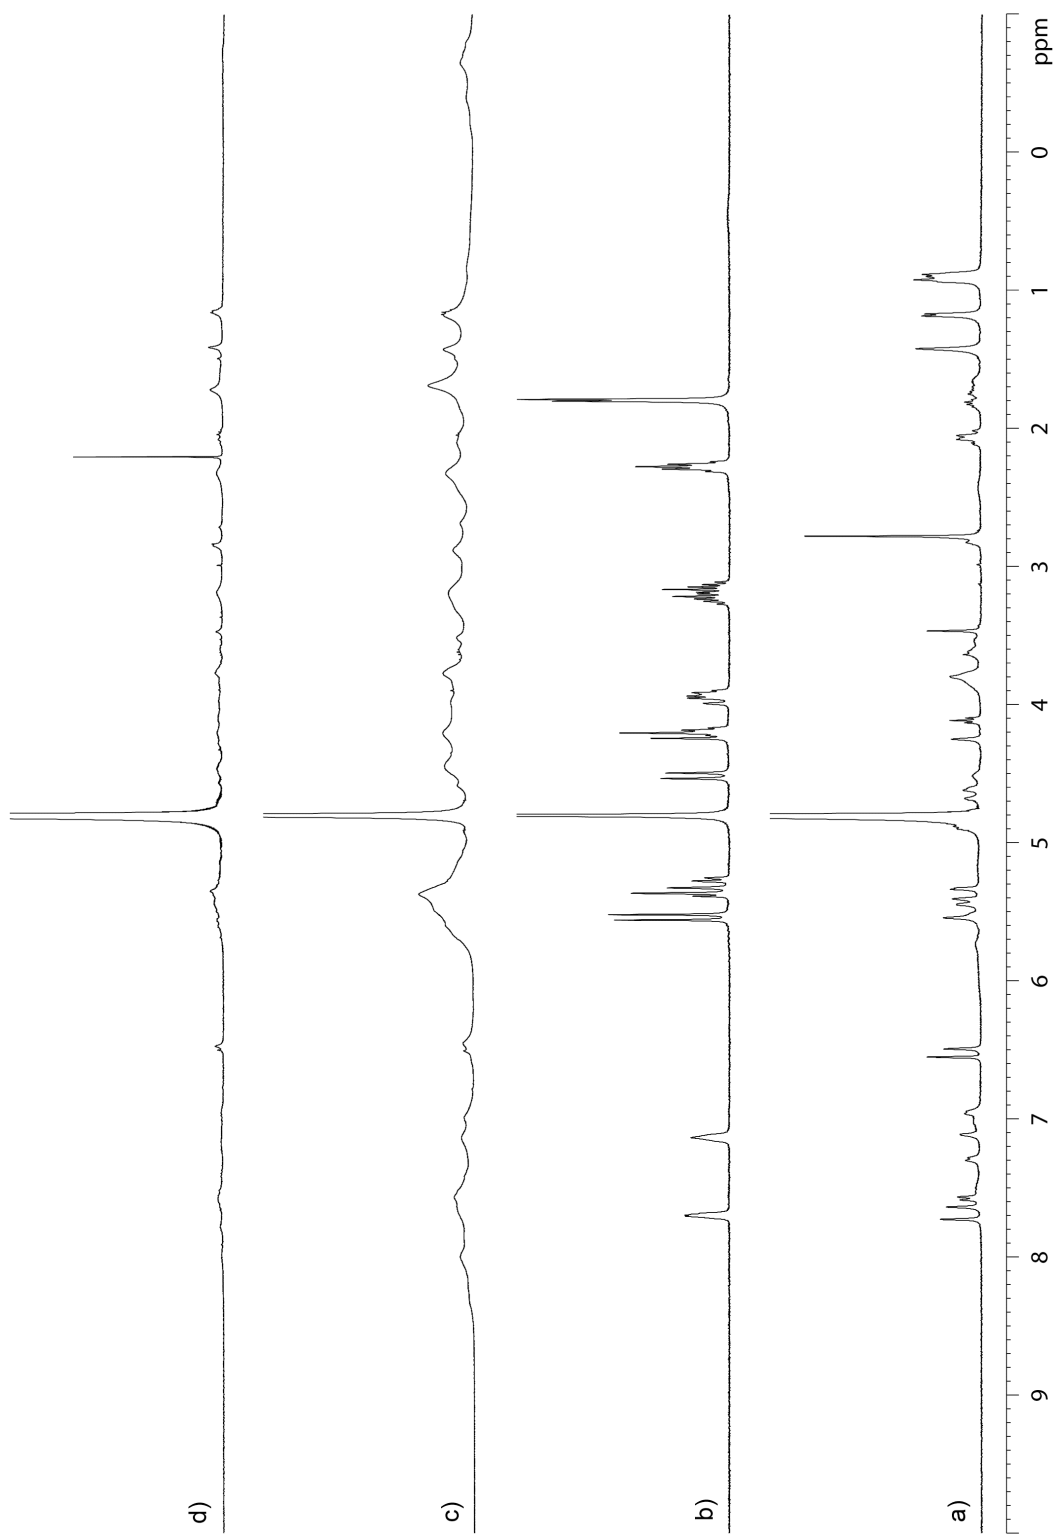

**Figure S39.** <sup>1</sup>H NMR spectra recorded (400 MHz, RT, D<sub>2</sub>O) for a) **14**, b) **2**, c) an equimolar mixture of **2** and **14** (4 mM), and d) a 1:2 mixture of **2** (1 mM) and **14** (2 mM).



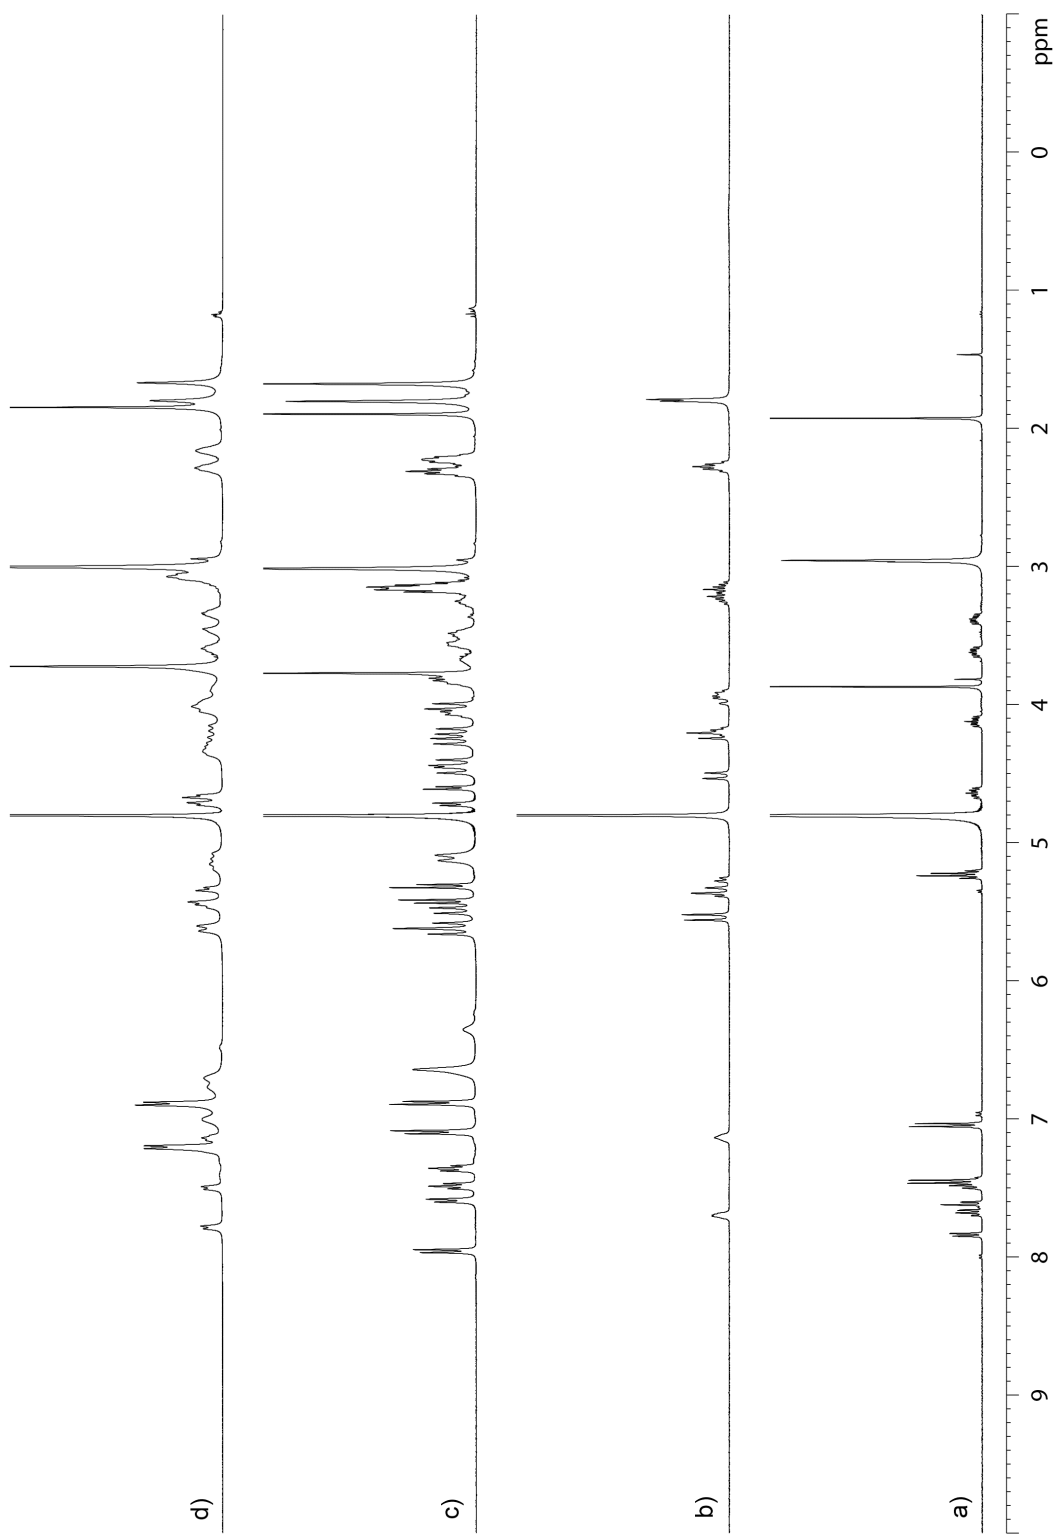

**Figure S40.** <sup>1</sup>H NMR spectra recorded (400 MHz, RT, D<sub>2</sub>O) for a) **15**, b) **2**, c) an equimolar mixture of **2** and **15** (12.5 mM), and d) a 1:2 mixture of **2** (12.5 mM) and **15** (25 mM).

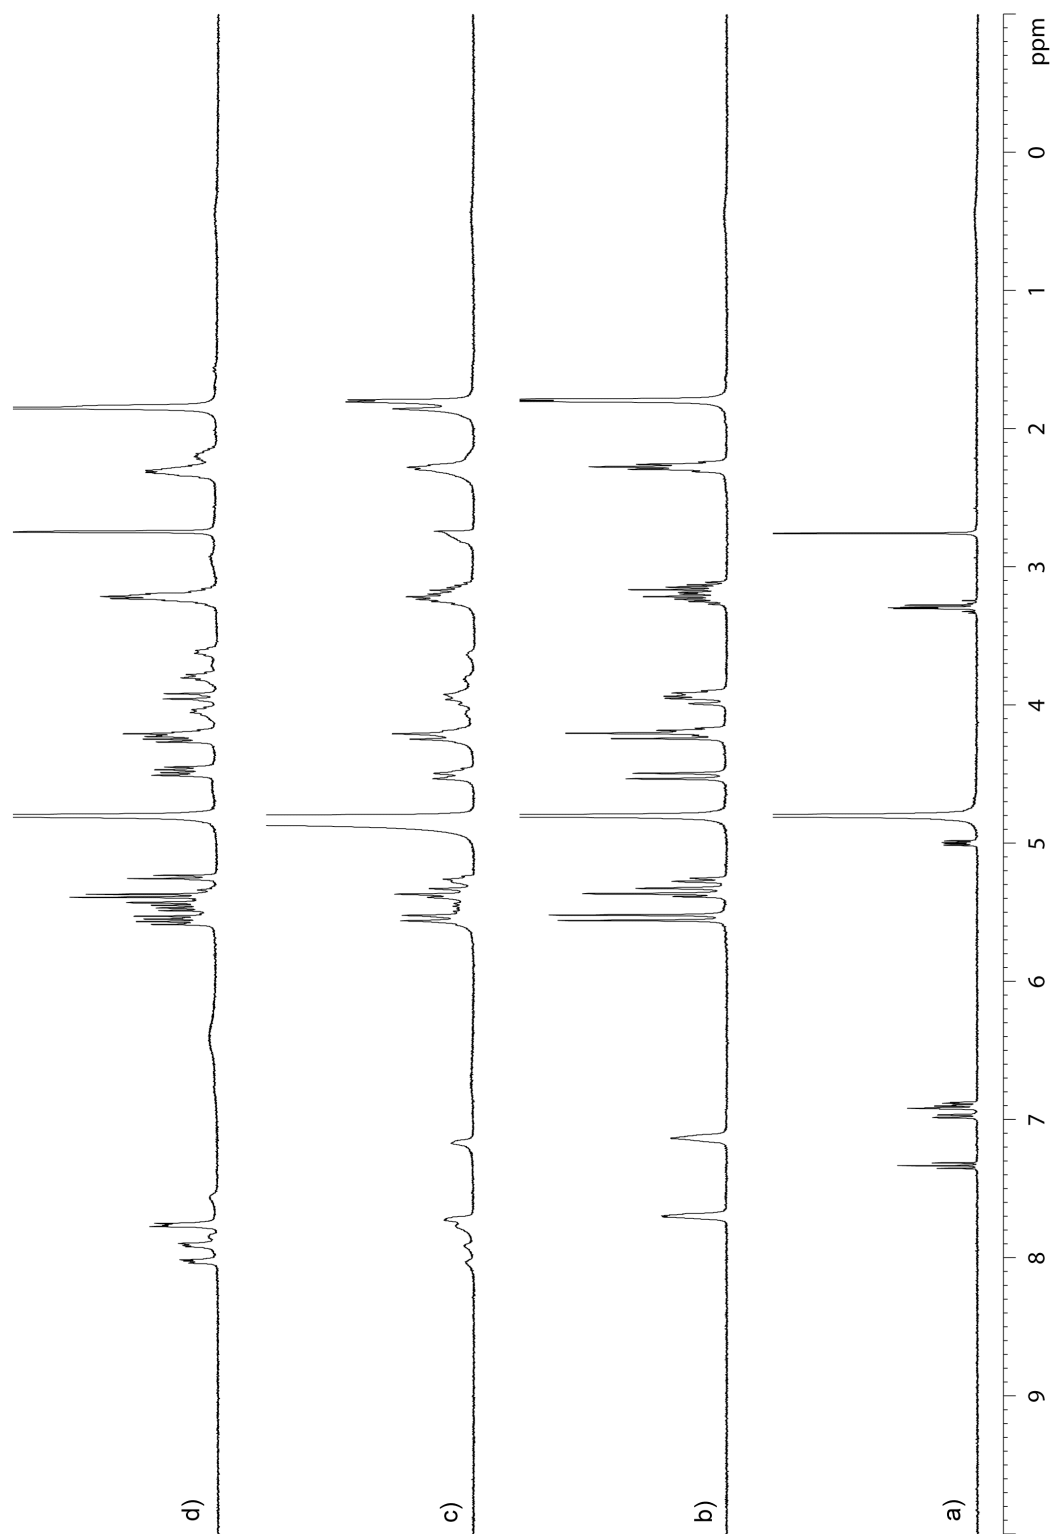

**Figure S41.** <sup>1</sup>H NMR spectra recorded (400 MHz, RT, D<sub>2</sub>O) for a) **16**, b) **2**, and c) an equimolar mixture of **2** and **16** (2 mM), and d) a 1:2 mixture of **2** (0.7 mM) and **16** (1.3 mM).

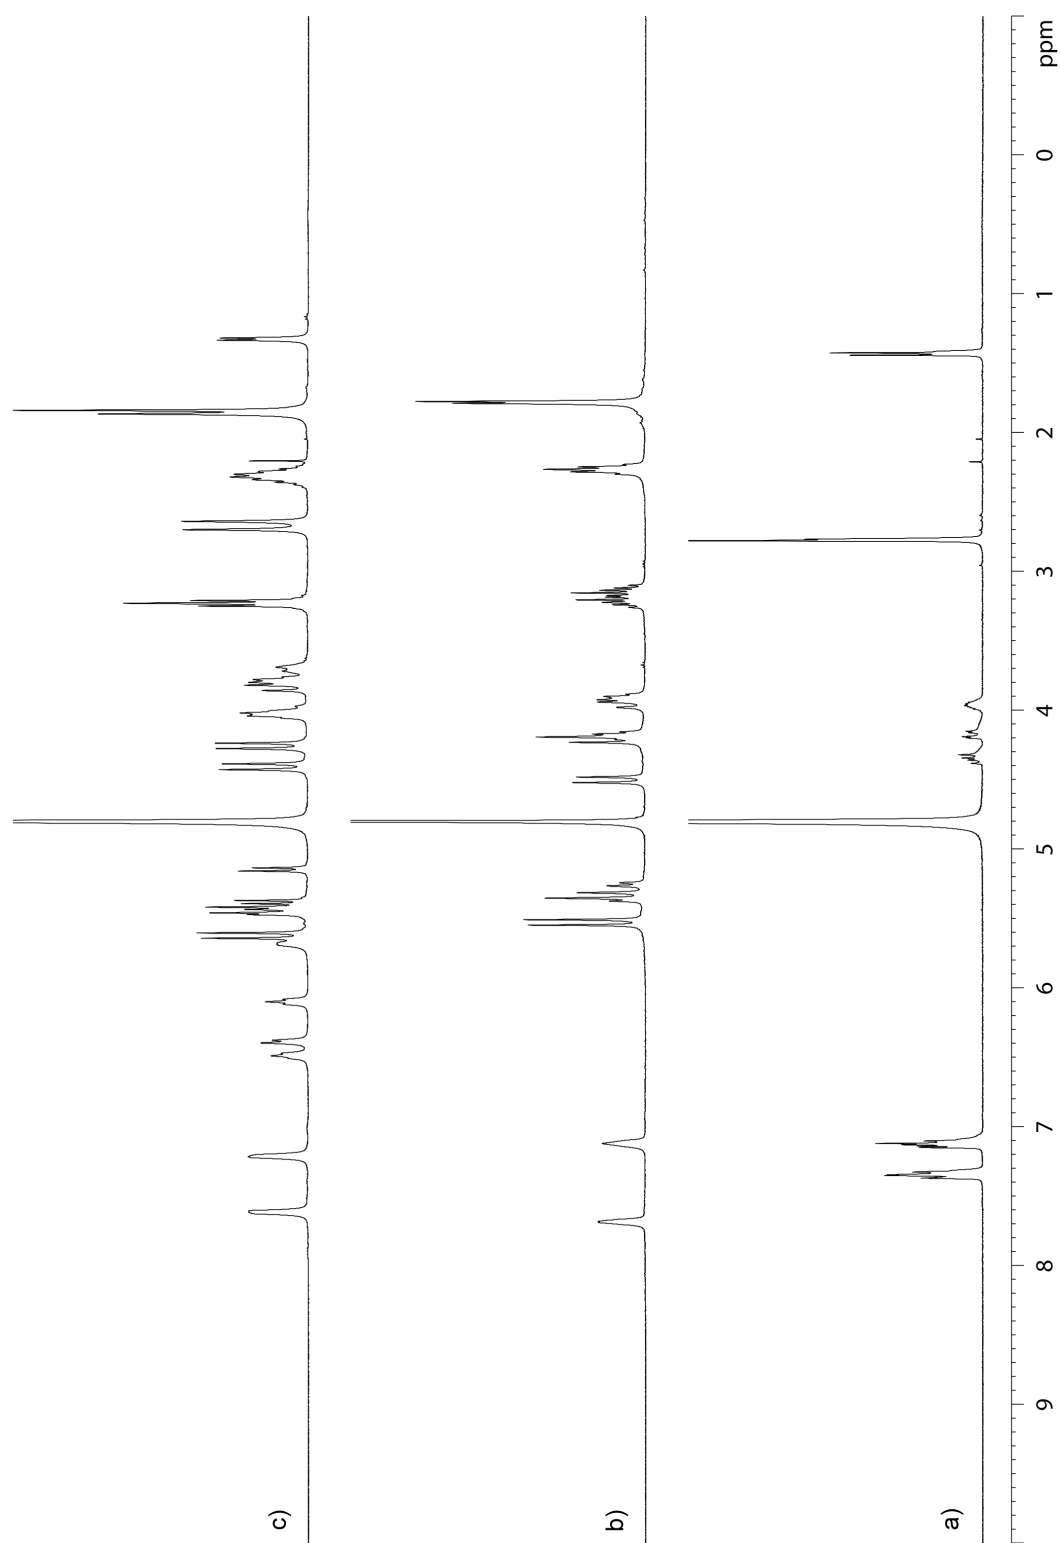

**Figure S42.** <sup>1</sup>H NMR spectra recorded (400 MHz, RT, D<sub>2</sub>O) for a) **17**, b) **2**, and c) an equimolar mixture of **2** and **17** (4 mM).

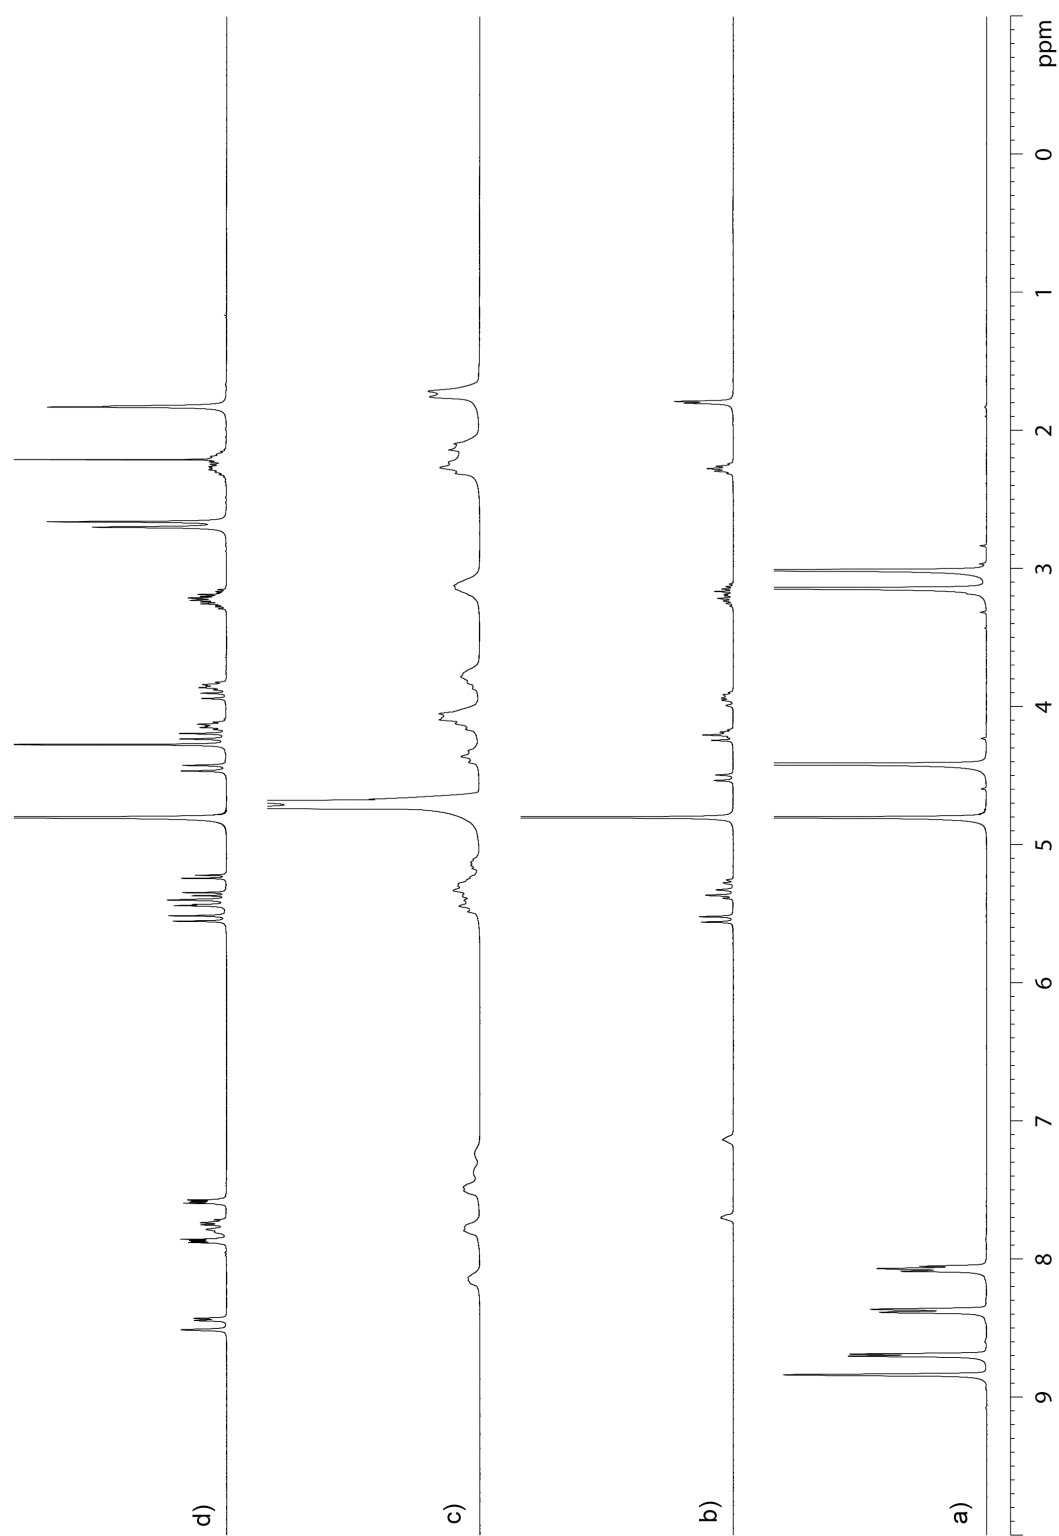

**Figure S43.** <sup>1</sup>H NMR spectra recorded (400 MHz, RT, D<sub>2</sub>O) for a) **18**, b) **2**, c) an equimolar mixture of **2** and **18** (4 mM), and d) a 1:2 mixture of **2** (4 mM) and **18** (8 mM).

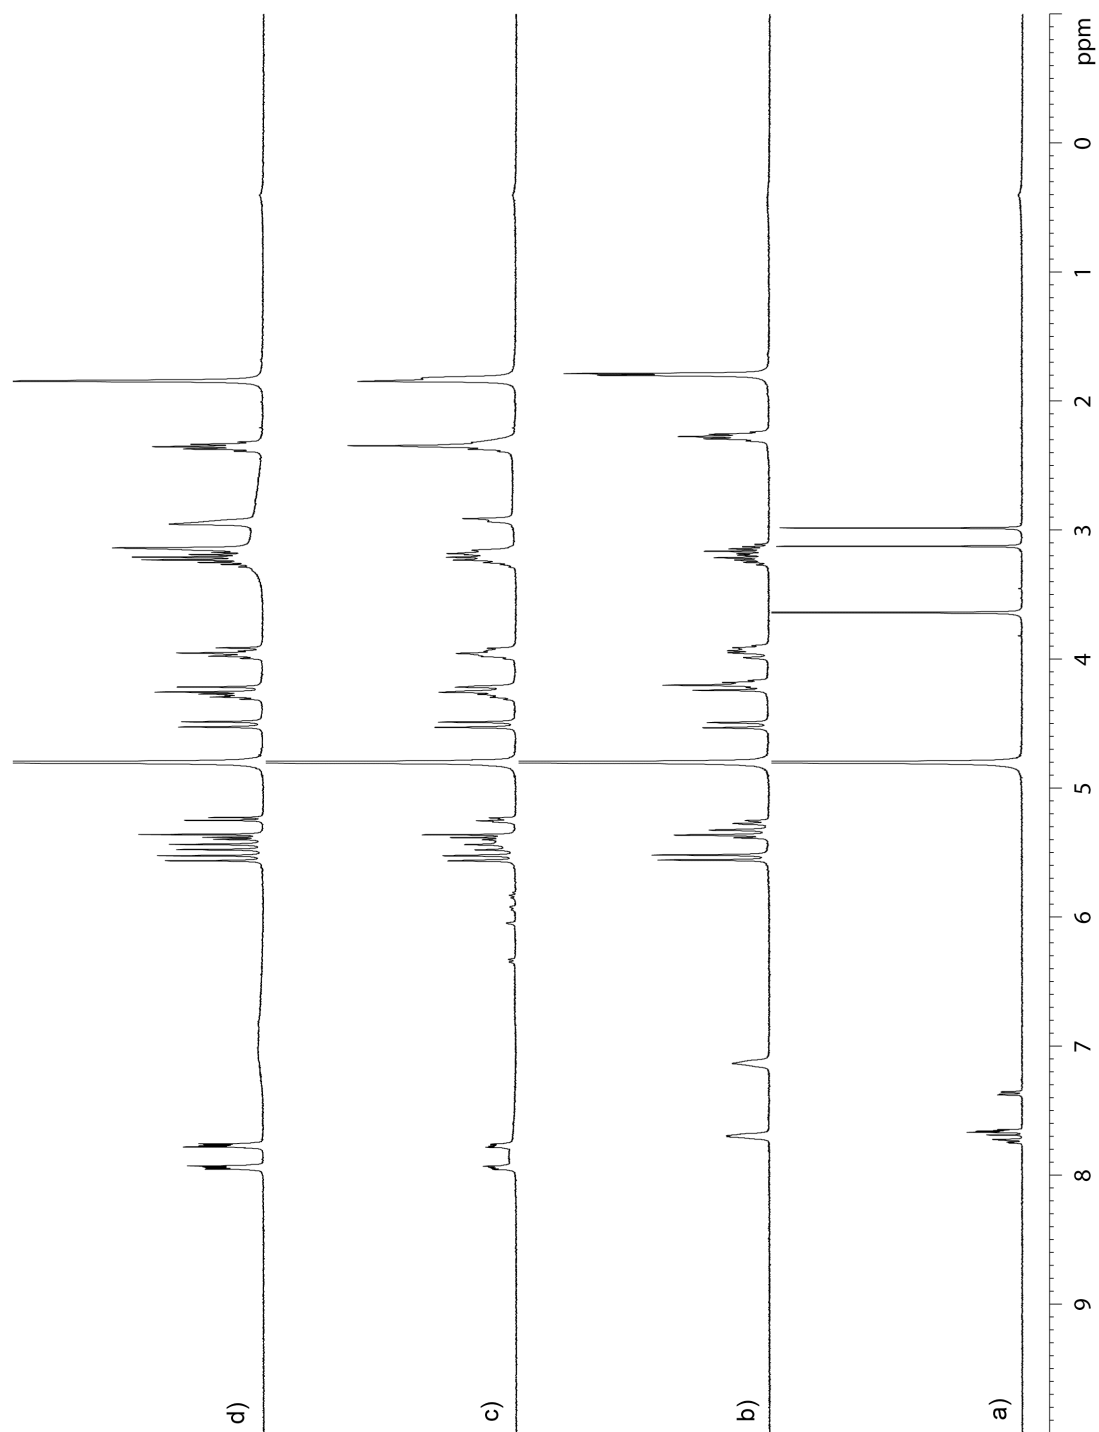

**Figure S44.** <sup>1</sup>H NMR spectra recorded (400 MHz, RT, D<sub>2</sub>O) for a) **19**, b) **2**, c) an equimolar mixture of **2** and **19** (4 mM), and d) a 1:2 mixture of **2** (4 mM) and **19** (8 mM).

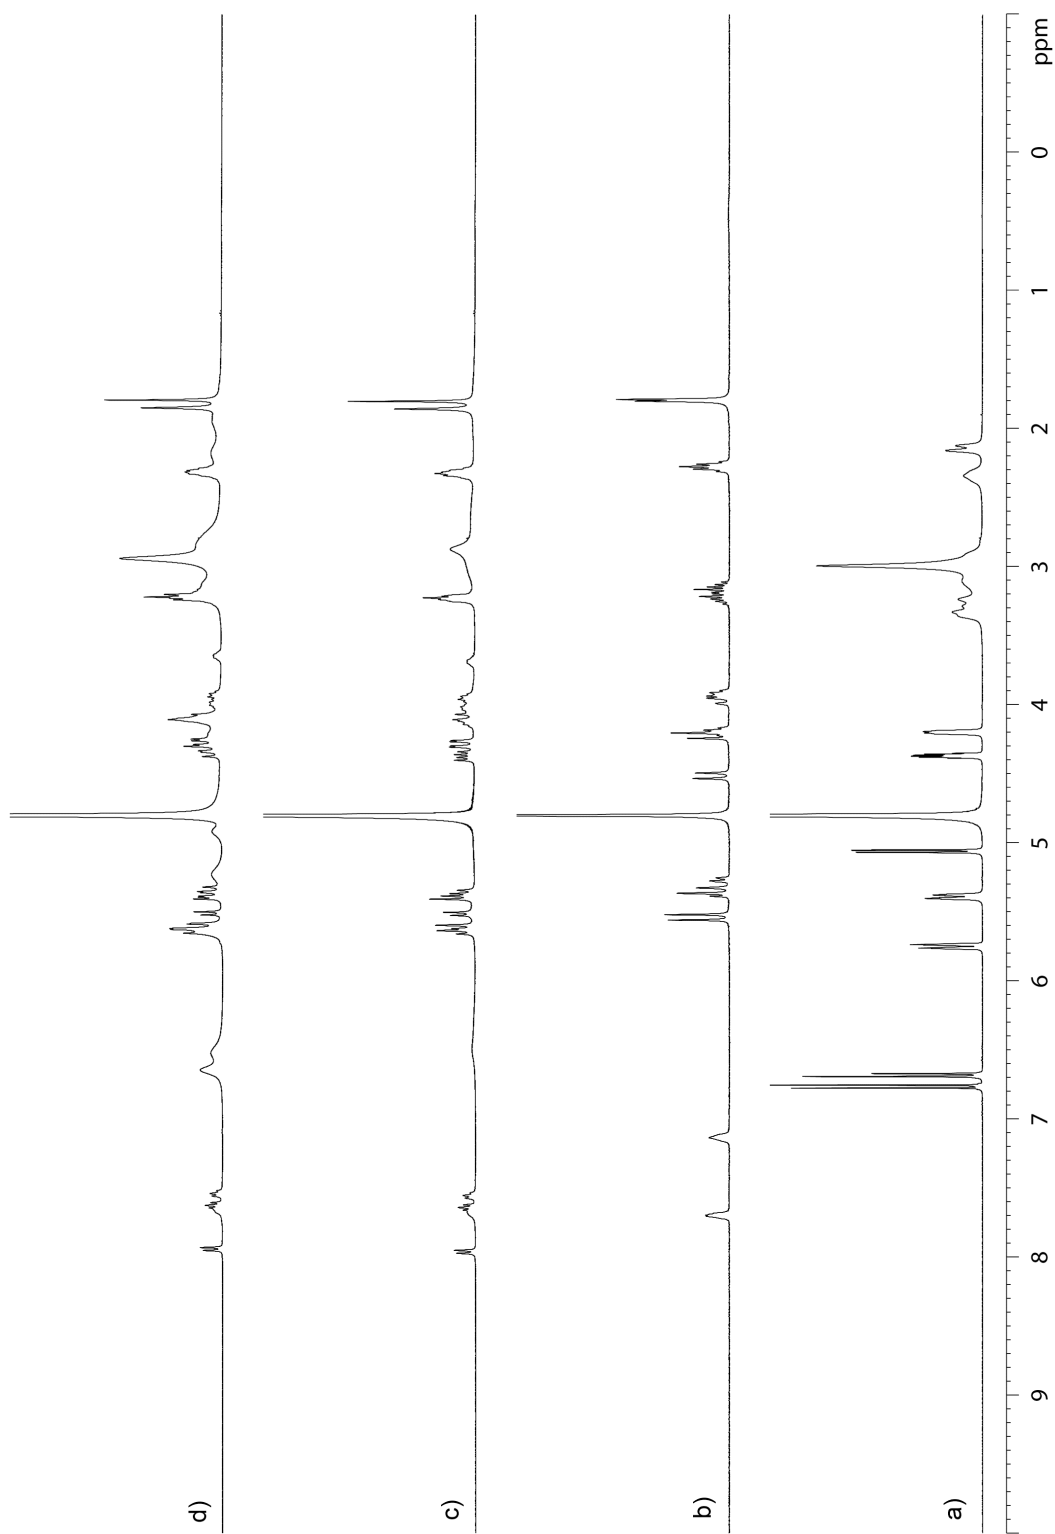

**Figure S45.** <sup>1</sup>H NMR spectra recorded (400 MHz, RT, D<sub>2</sub>O) for a) **20**, b) **2**, c) an equimolar mixture of **2** and **20** (5 mM), and d) a 1:2 mixture of **2** (5 mM) and **20** (10 mM).

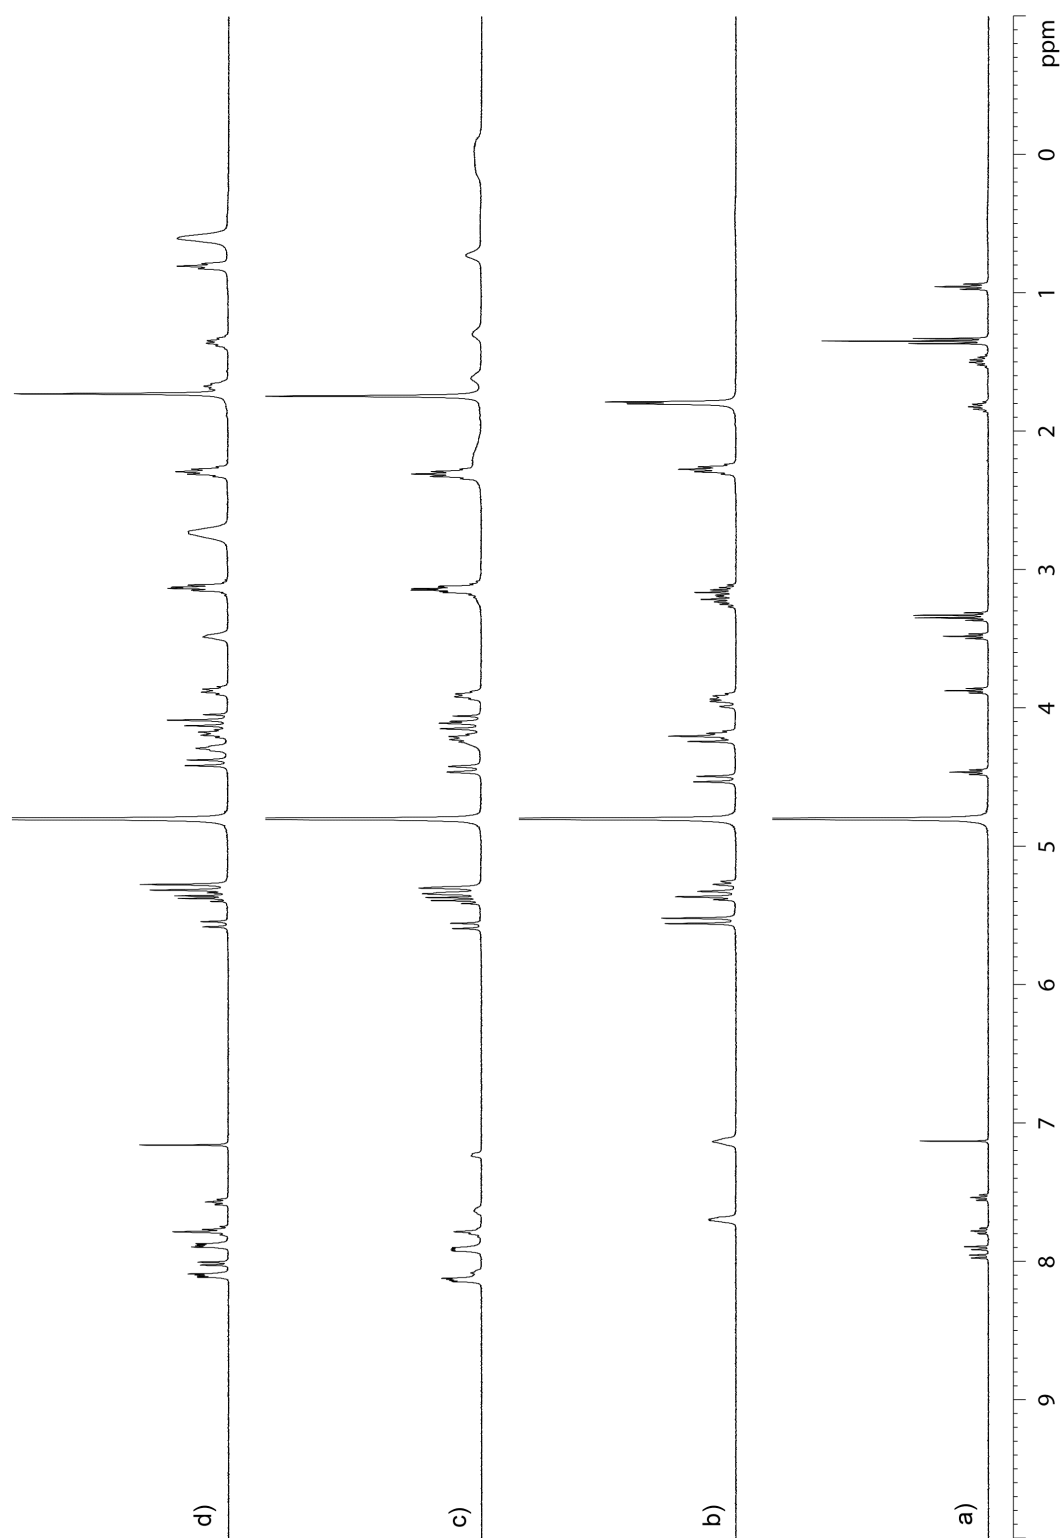

**Figure S46.** <sup>1</sup>H NMR spectra recorded (400 MHz, RT, D<sub>2</sub>O) for a) **21**, b) **2**, and c) an equimolar mixture of **2** and **21** (4 mM), and d) a 1:2 mixture of **2** (2 mM) and **21** (4 mM).

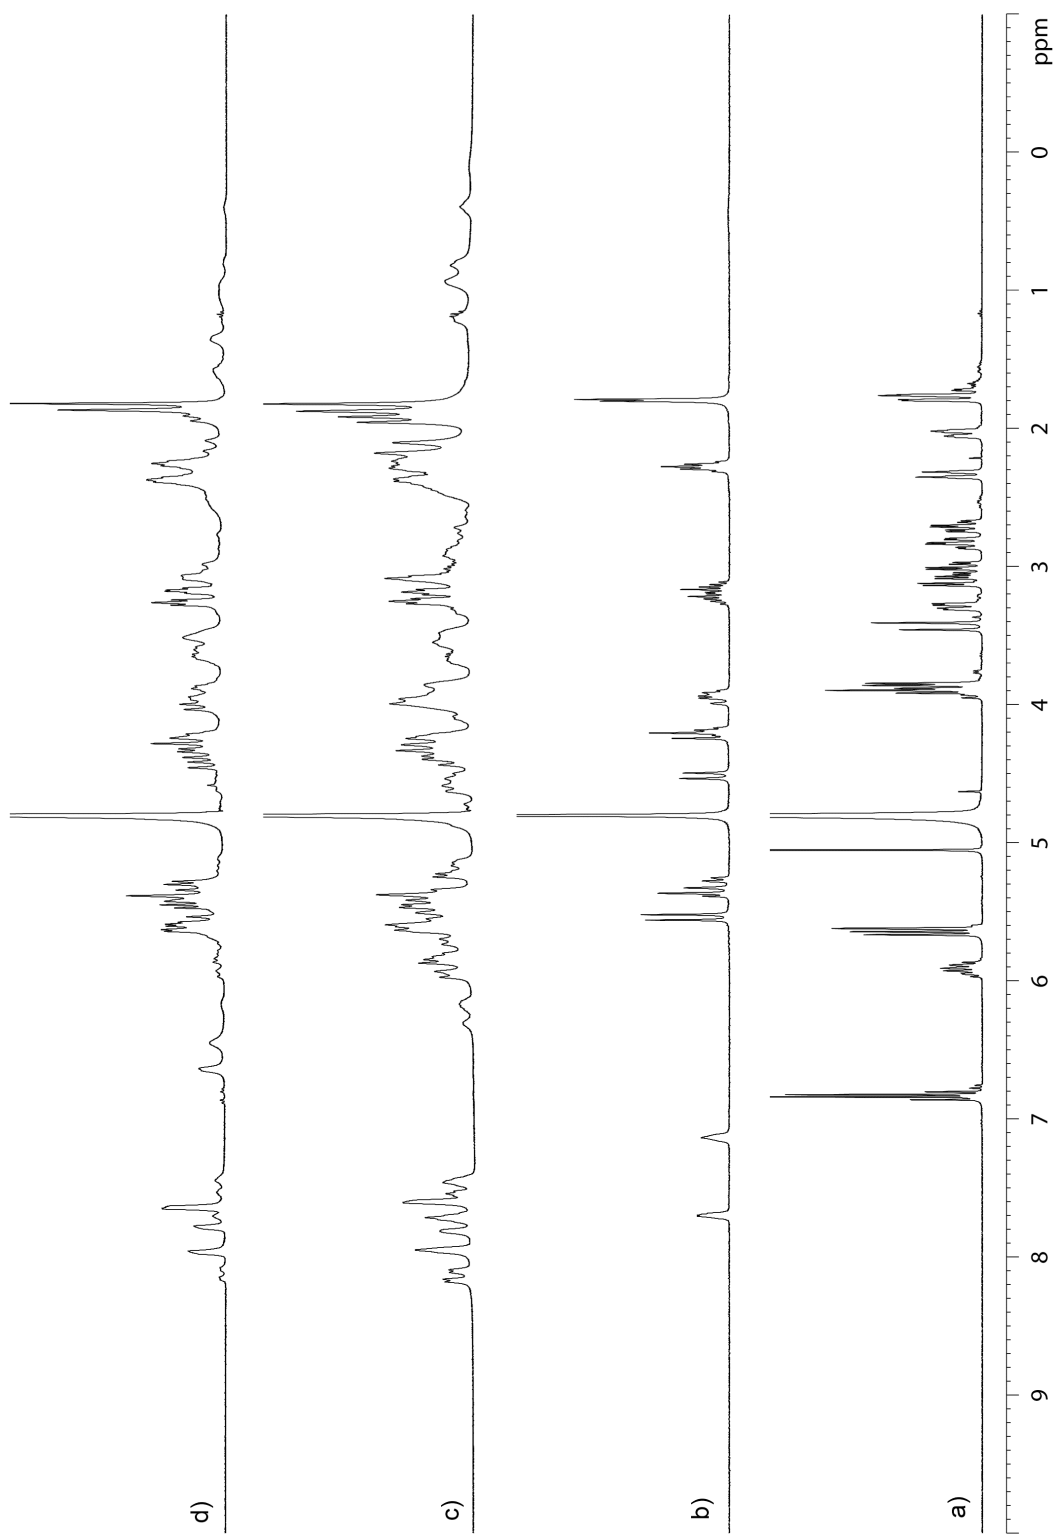

**Figure 47.** <sup>1</sup>H NMR spectra recorded (400 MHz, RT, D<sub>2</sub>O) for a) **22**, b) **2**, c) an equimolar mixture of **2** and **22** (12.5 mM), and d) a 1:2 mixture of **2** (6.25 mM) and **22** (12.5 mM).



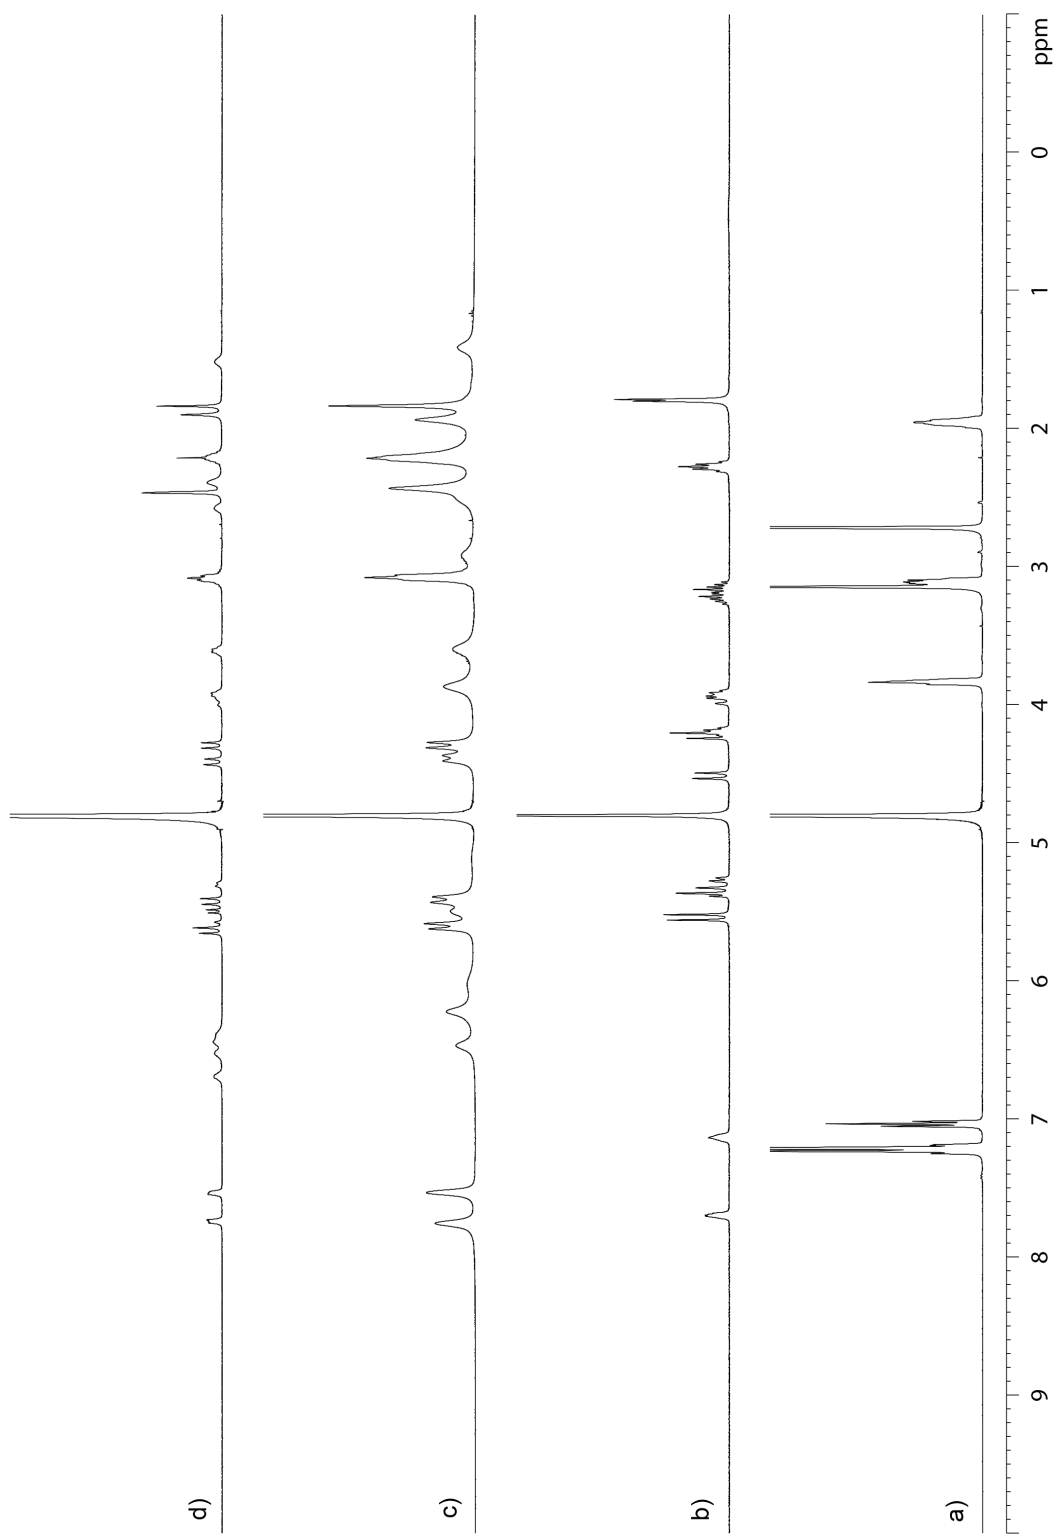

**Figure S48.** <sup>1</sup>H NMR spectra recorded (400 MHz, RT, D<sub>2</sub>O) for a) **23**, b) **2**, c) an equimolar mixture of **2** and **23** (5 mM), and d) a 1:2 mixture of **2** (5 mM) and **23** (10 mM).

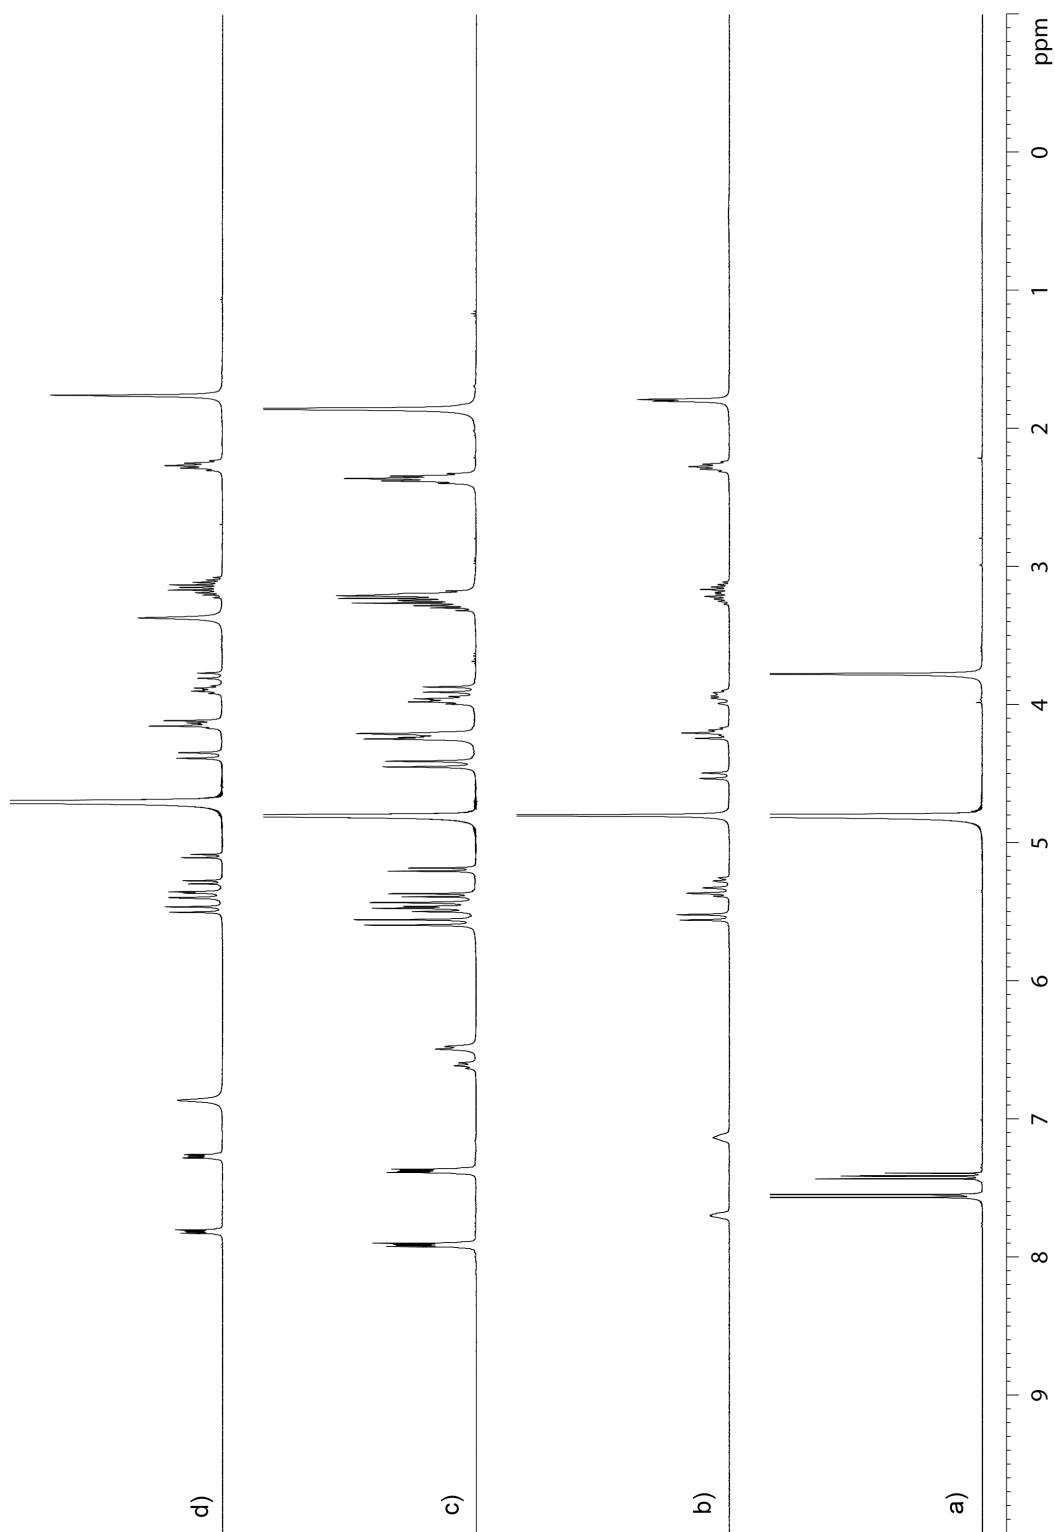

**Figure S49.** <sup>1</sup>H NMR spectra recorded (400 MHz, RT, D<sub>2</sub>O) for a) **24**, b) **2**, c) an equimolar mixture of **2** and **24** (5 mM), and d) a 1:2 mixture of **2** (5 mM) and **24** (10 mM).

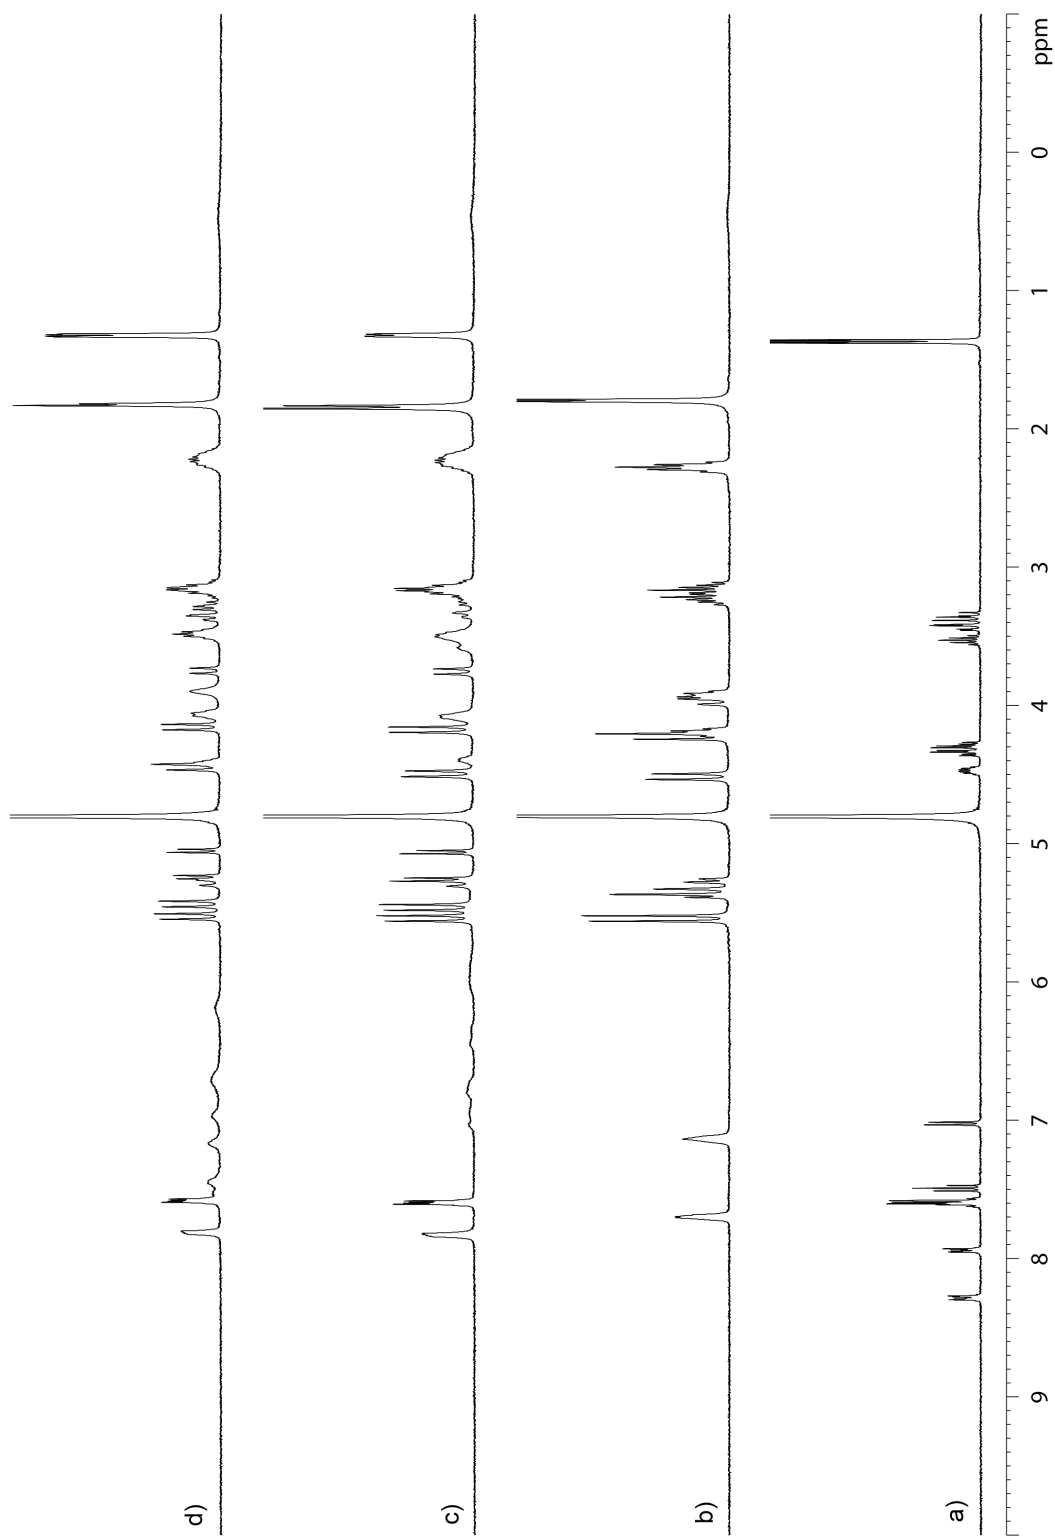

**Figure S50.** <sup>1</sup>H NMR spectra recorded (400 MHz, RT, D<sub>2</sub>O) for a) **25**, b) **2**, and c) an equimolar mixture of **2** and **25** (2 mM), and d) a 1:2 mixture of **2** (0.7 mM) and **25** (1.3 mM).

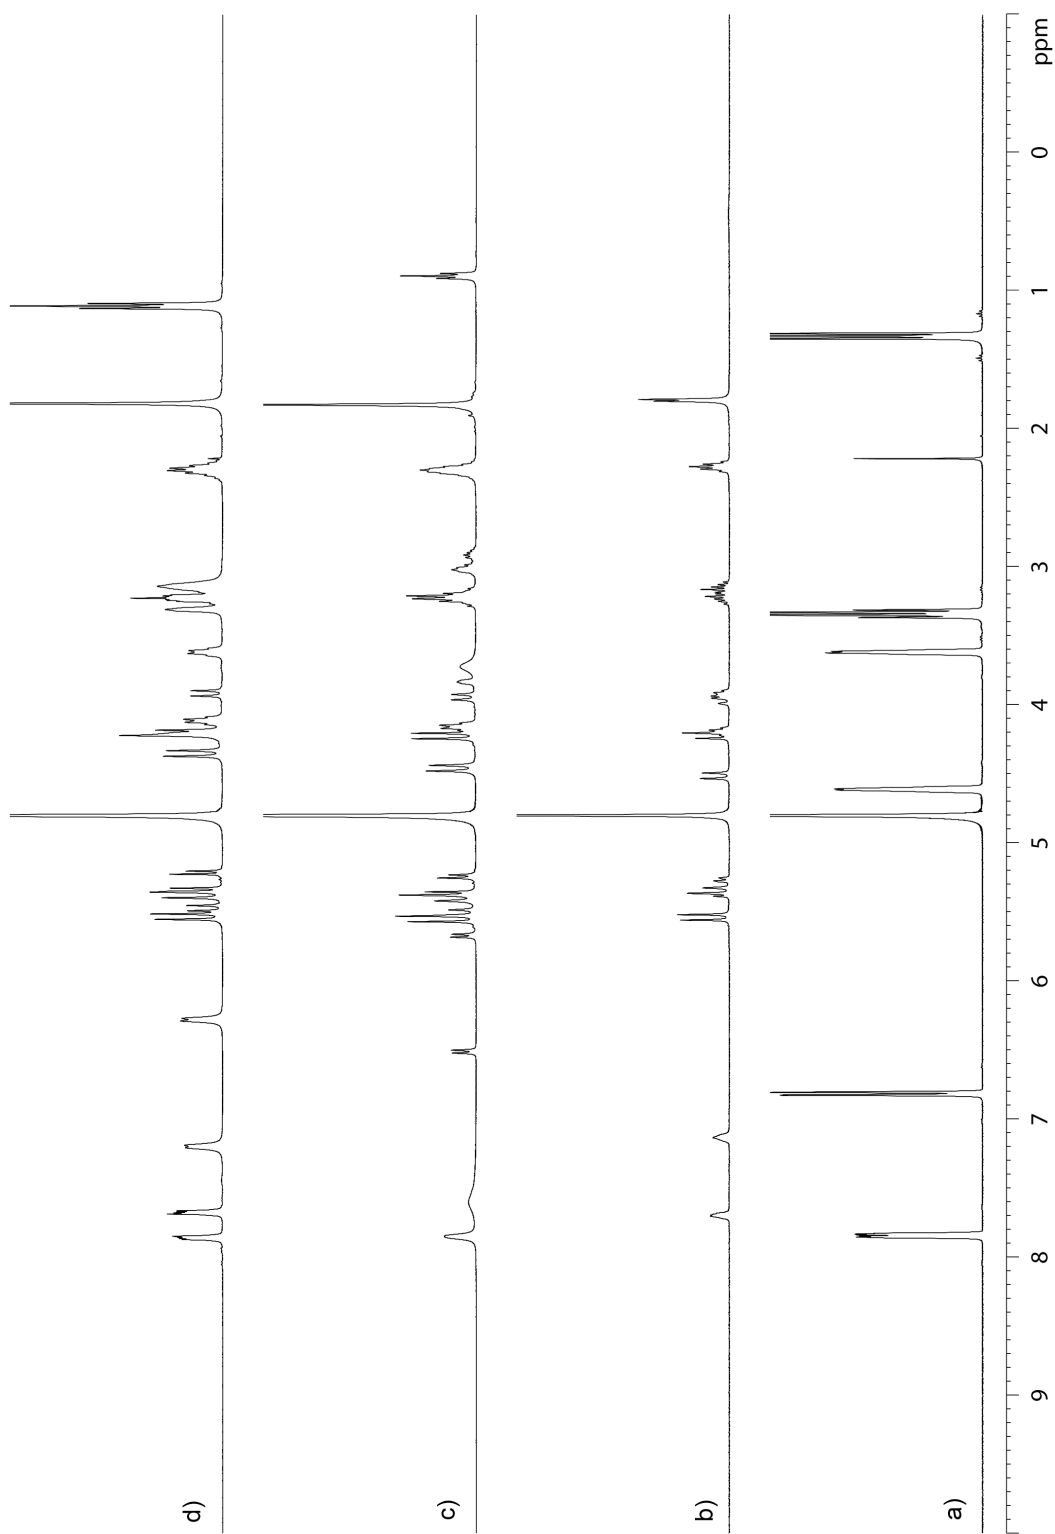

**Figure S51.** <sup>1</sup>H NMR spectra recorded (400 MHz, RT, D<sub>2</sub>O) for a) **26**, b) **2**, c) an equimolar mixture of **2** and **26** (4 mM), and d) a 1:2 mixture of **2** (4 mM) and **26** (8 mM).

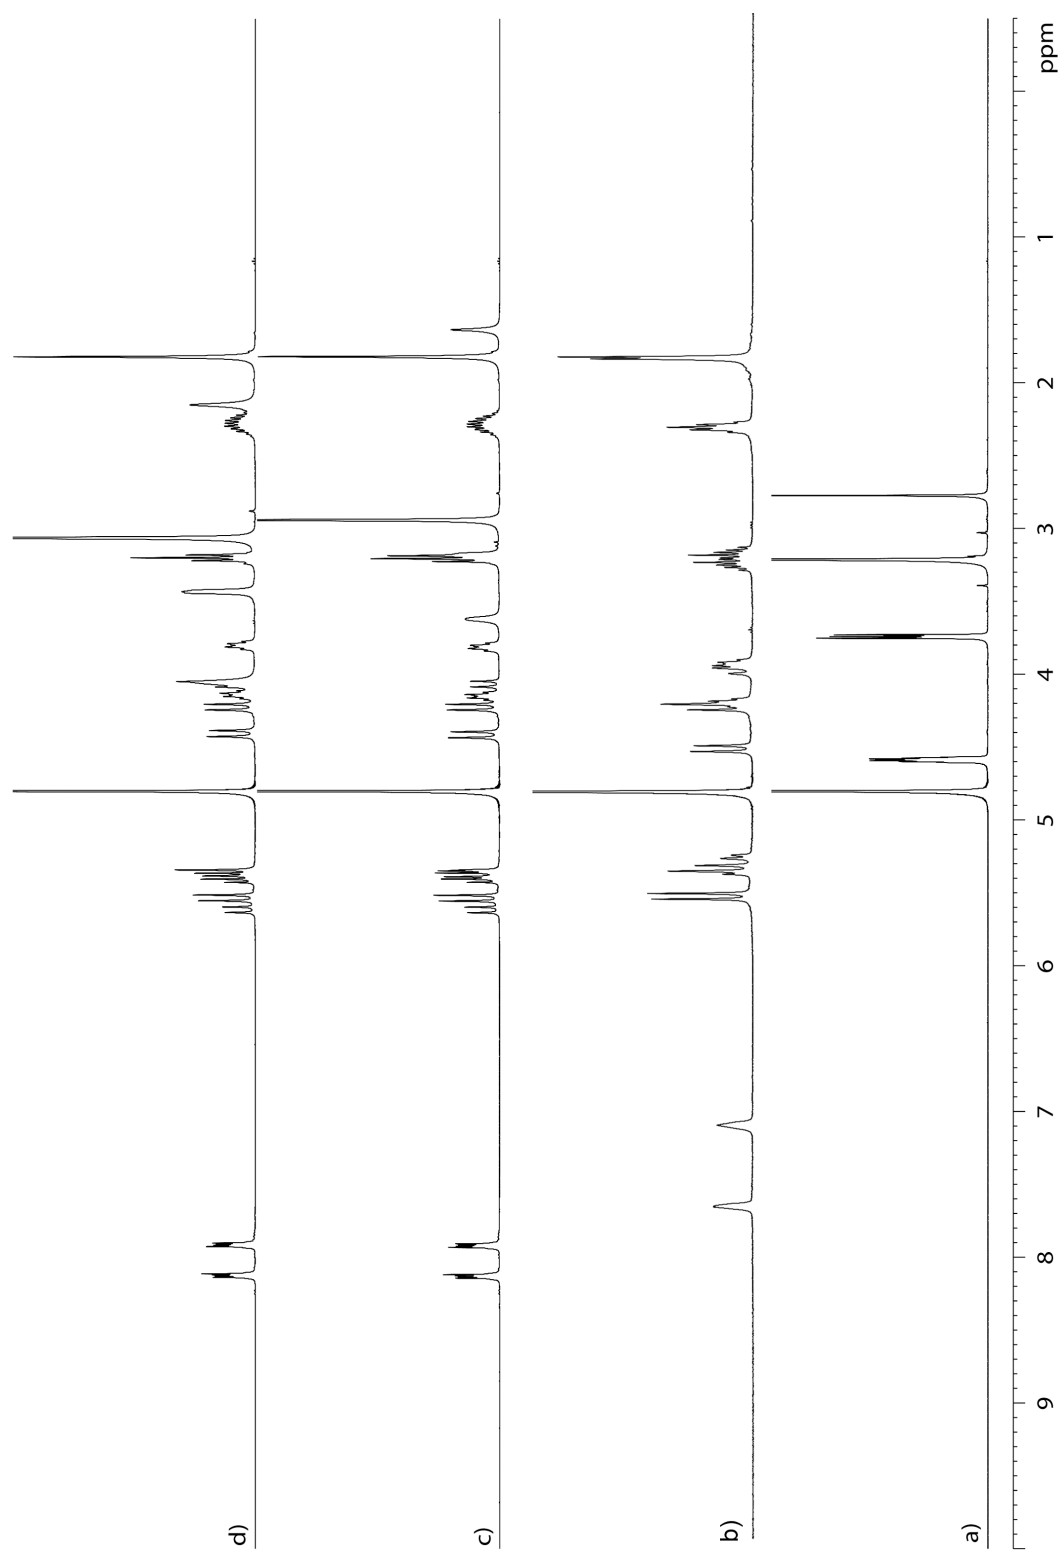

**Figure S52.** <sup>1</sup>H NMR spectra recorded (400 MHz, RT, D<sub>2</sub>O) for a) **27**, b) **2**, c) an equimolar mixture of **2** and **27** (5 mM), and d) a 1:2 mixture of **2** (5 mM) and **27** (10 mM).

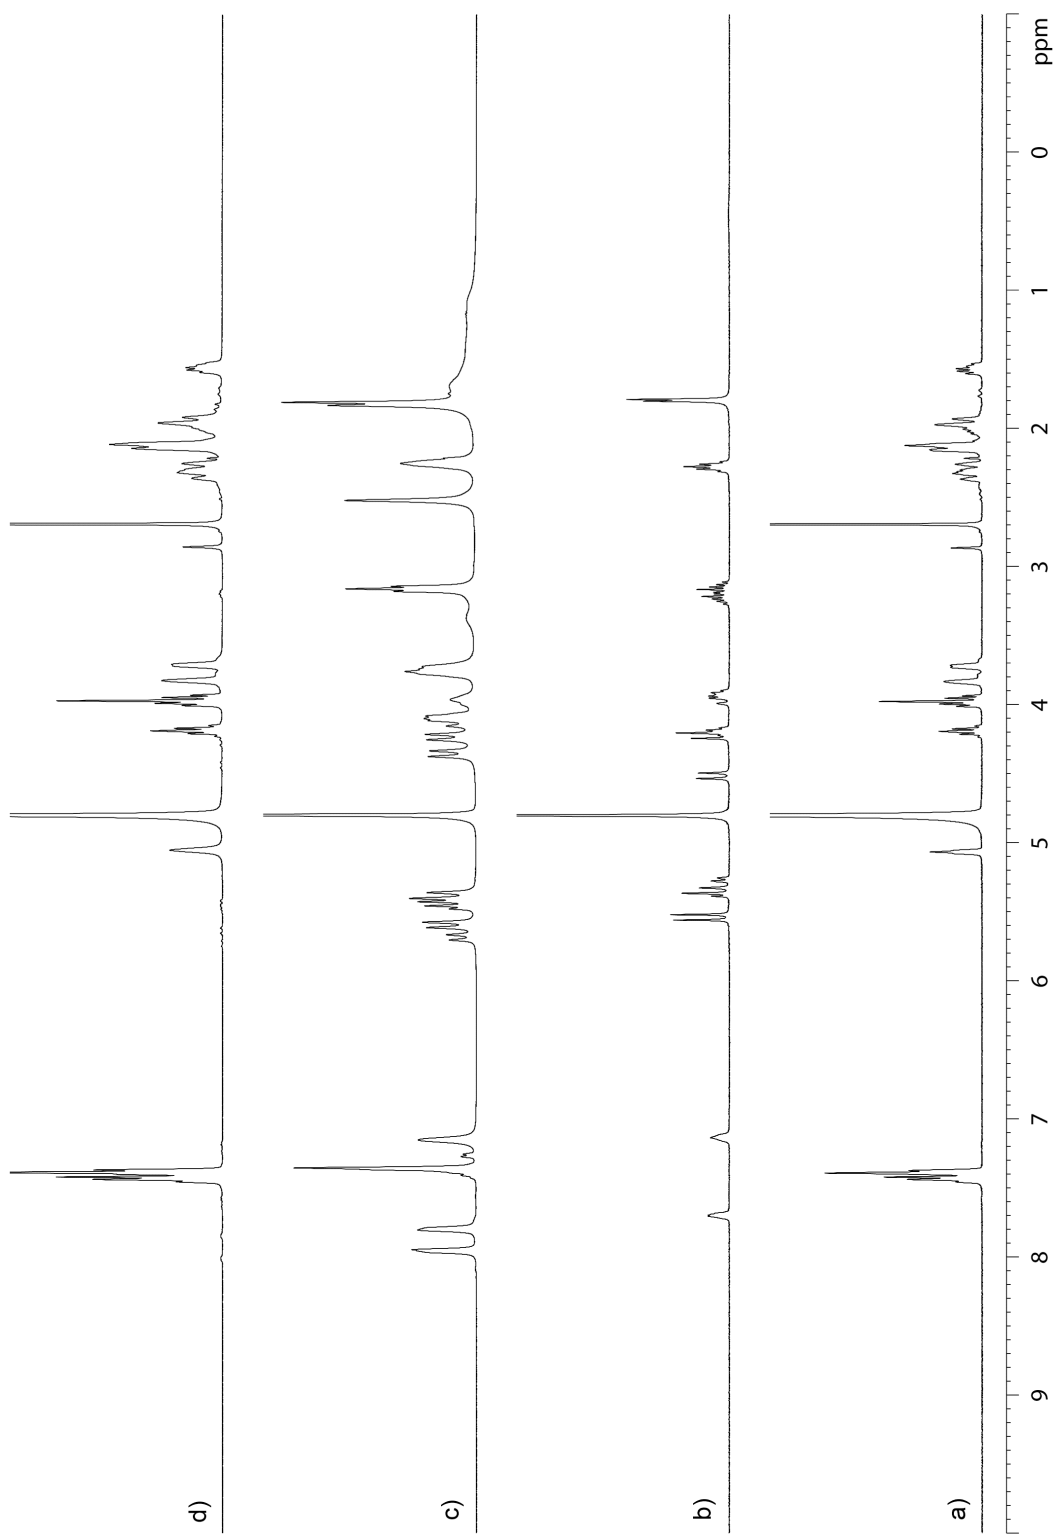

**Figure S53.** <sup>1</sup>H NMR spectra recorded (400 MHz, RT, D<sub>2</sub>O) for a) **28**, b) **2**, c) an equimolar mixture of **2** and **28** (12.5 mM), and d) a 1:2 mixture of **2** (12.5 mM) and **28** (25 mM).

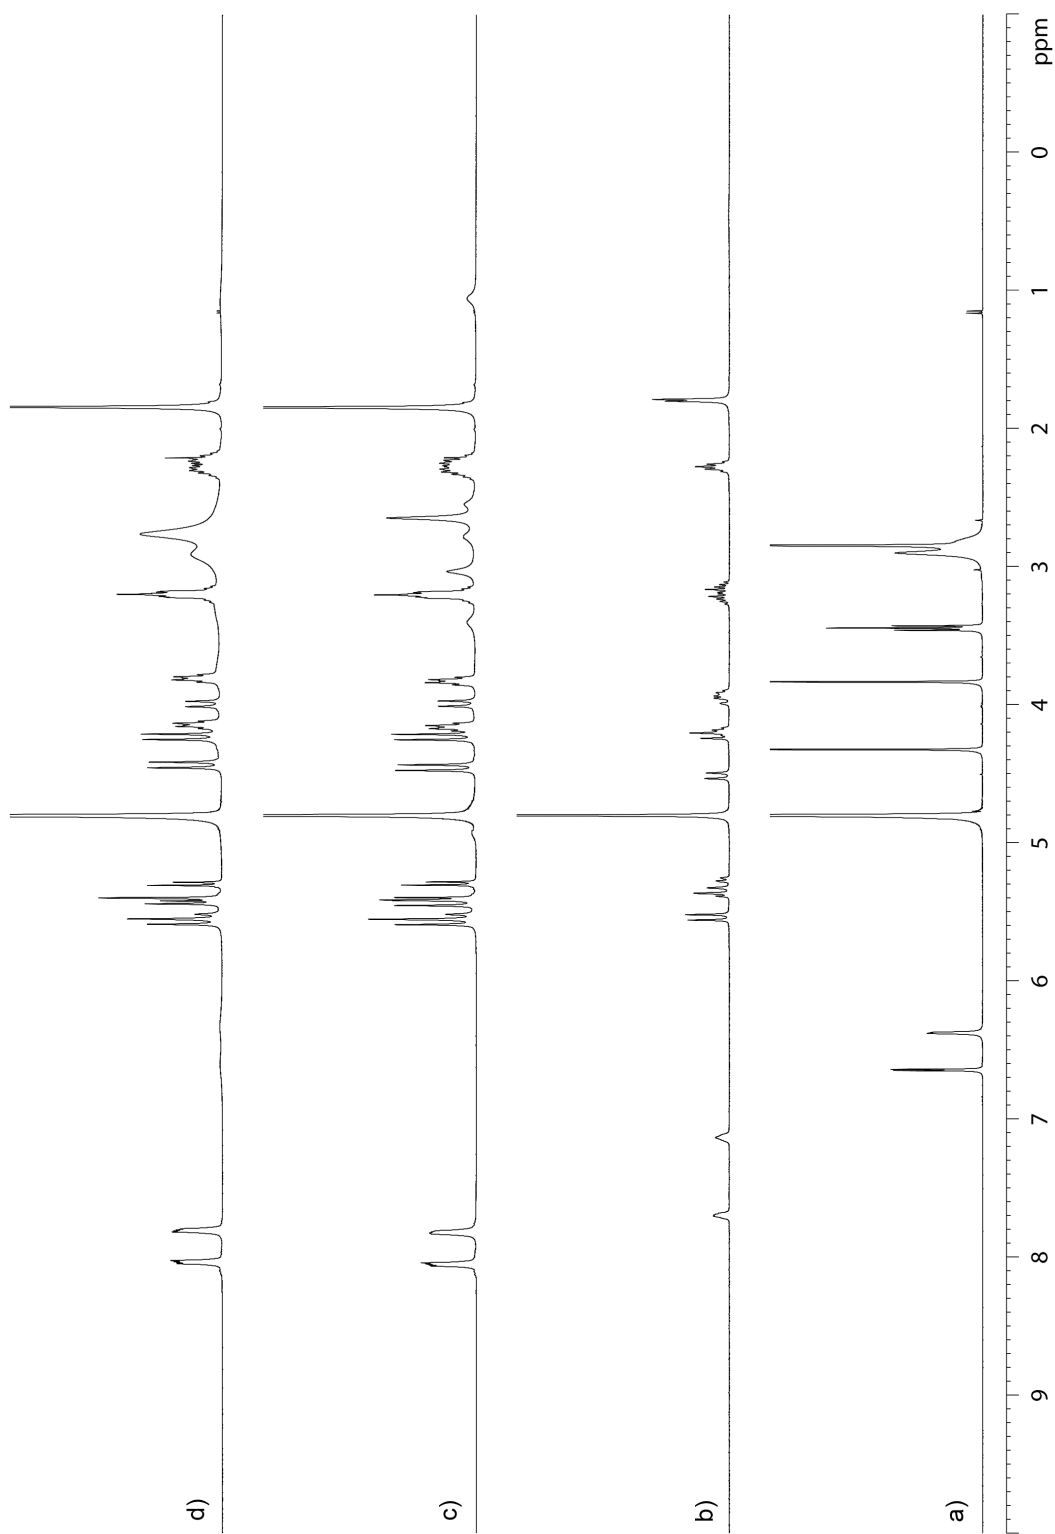

**Figure S54.** <sup>1</sup>H NMR spectra recorded (400 MHz, RT, D<sub>2</sub>O) for a) **29**, b) **2**, c) an equimolar mixture of **2** and **29** (5 mM), and d) a 1:2 mixture of **2** (5 mM) and **29** (10 mM).

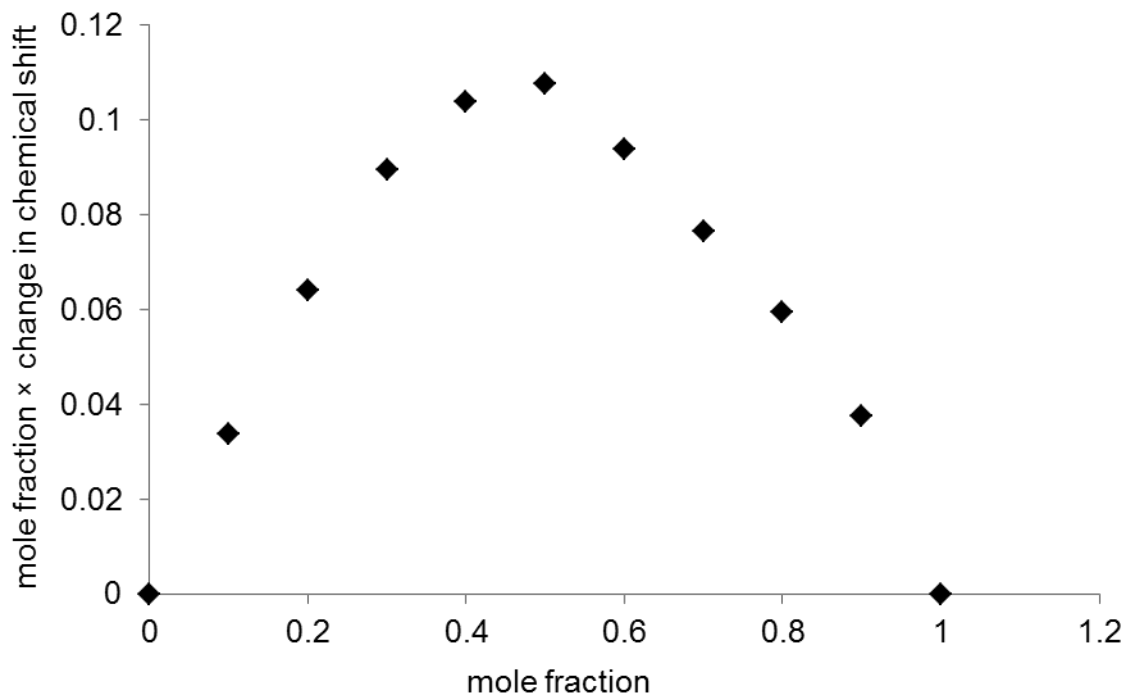

**Figure S55.** Job plot establishing 1:1 binding of **6** (0 - 1 mM) with **2** (0 - 1 mM) based on change in chemical shift of  $^1\text{H}$  NMR (400 MHz,  $\text{D}_2\text{O}$ ).

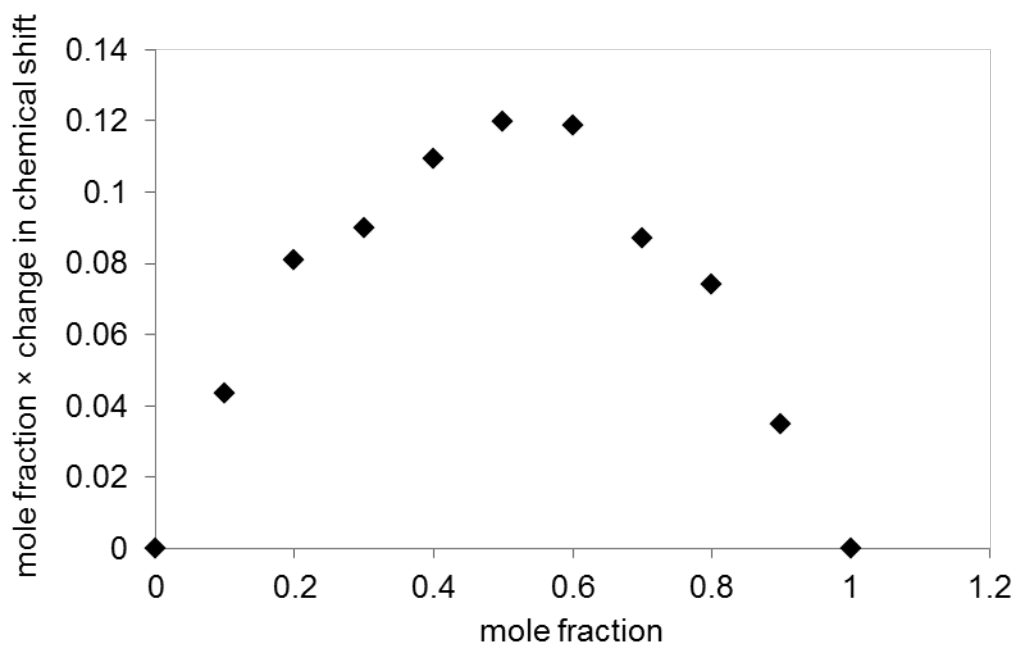

**Figure S56.** Job plot establishing 1:1 binding of **7** (0 - 1 mM) with **2** (0 - 1 mM) based on change in chemical shift of  $^1\text{H}$  NMR (400 MHz,  $\text{D}_2\text{O}$ ).



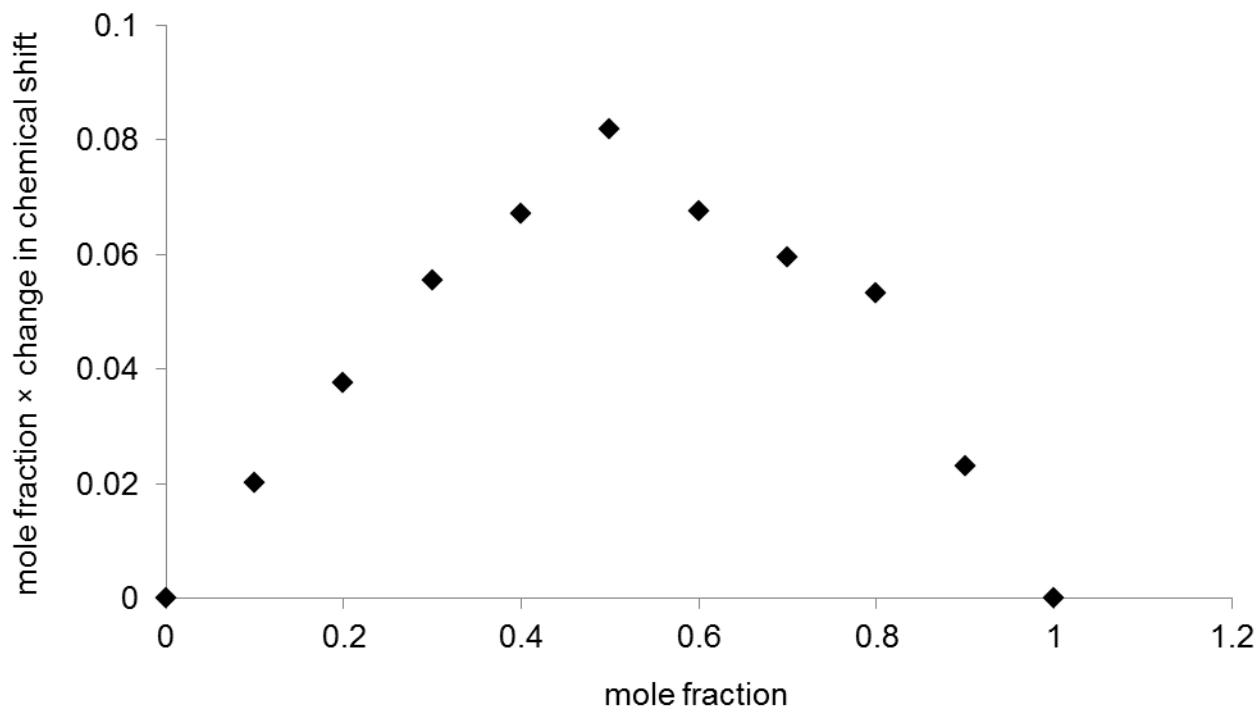

**Figure S57.** Job plot establishing 1:1 binding of **13** (0 - 1 mM) with **2** (0 - 1 mM) based on change in chemical shift of  $^1\text{H}$  NMR (400 MHz,  $\text{D}_2\text{O}$ ).

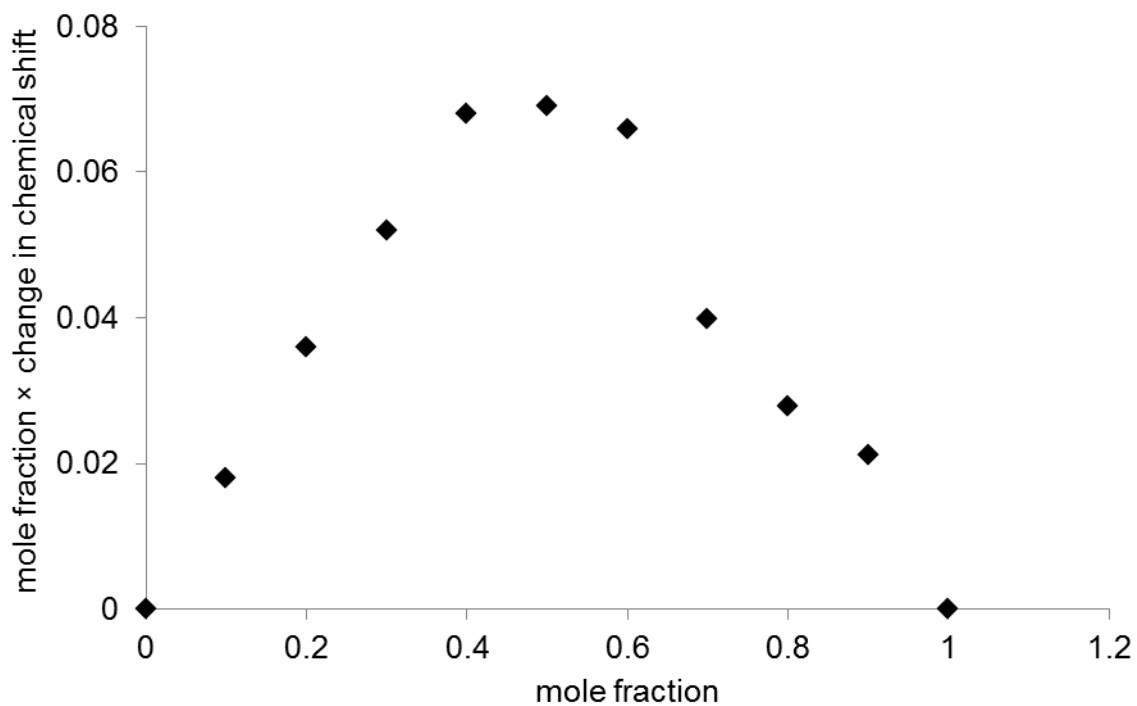

**Figure S58.** Job plot establishing 1:1 binding of **15** (0 - 1 mM) with **2** (0 - 1 mM) based on change in chemical shift of  $^1\text{H}$  NMR (400 MHz,  $\text{D}_2\text{O}$ ).

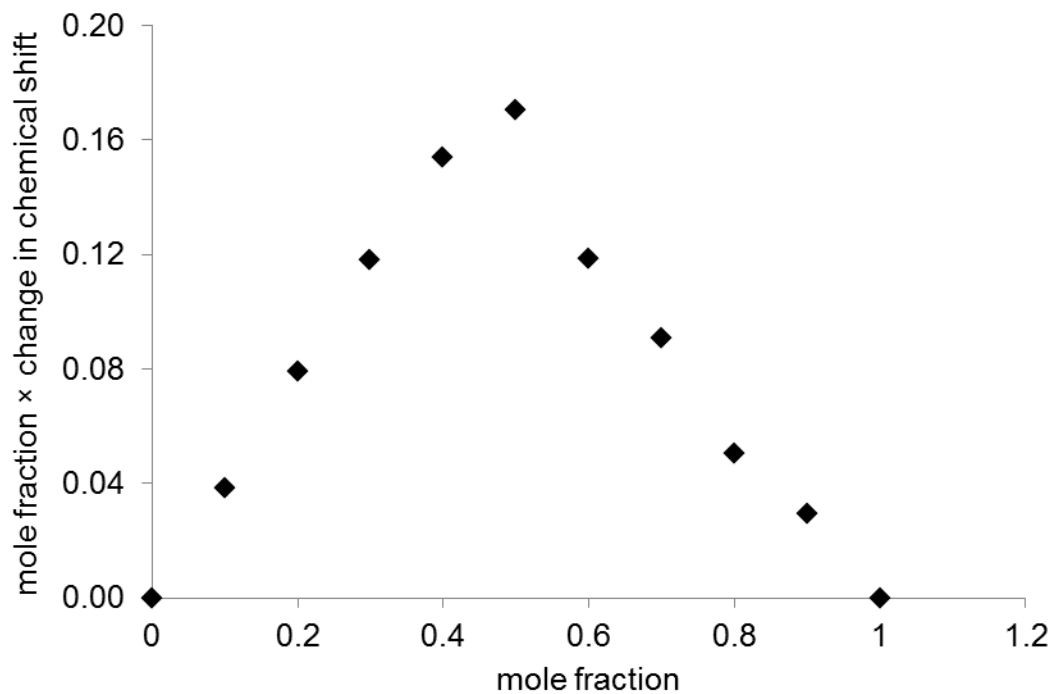

**Figure S59.** Job plot establishing 1:1 binding of **20** (0 - 1 mM) with **2** (0 - 1 mM) based on change in chemical shift of  $^1\text{H}$  NMR (400 MHz,  $\text{D}_2\text{O}$ ).

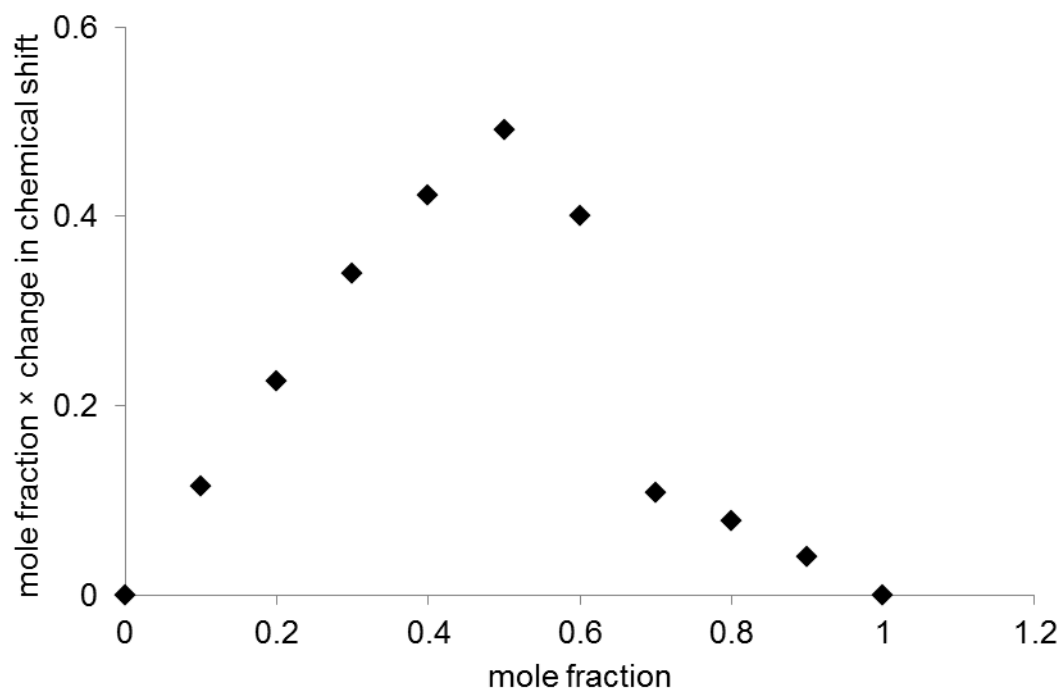

**Figure S60.** Job plot establishing 1:1 binding of **21** (0 - 1 mM) with **2** (0 - 1 mM) based on change in chemical shift of  $^1\text{H}$  NMR (400 MHz,  $\text{D}_2\text{O}$ ).

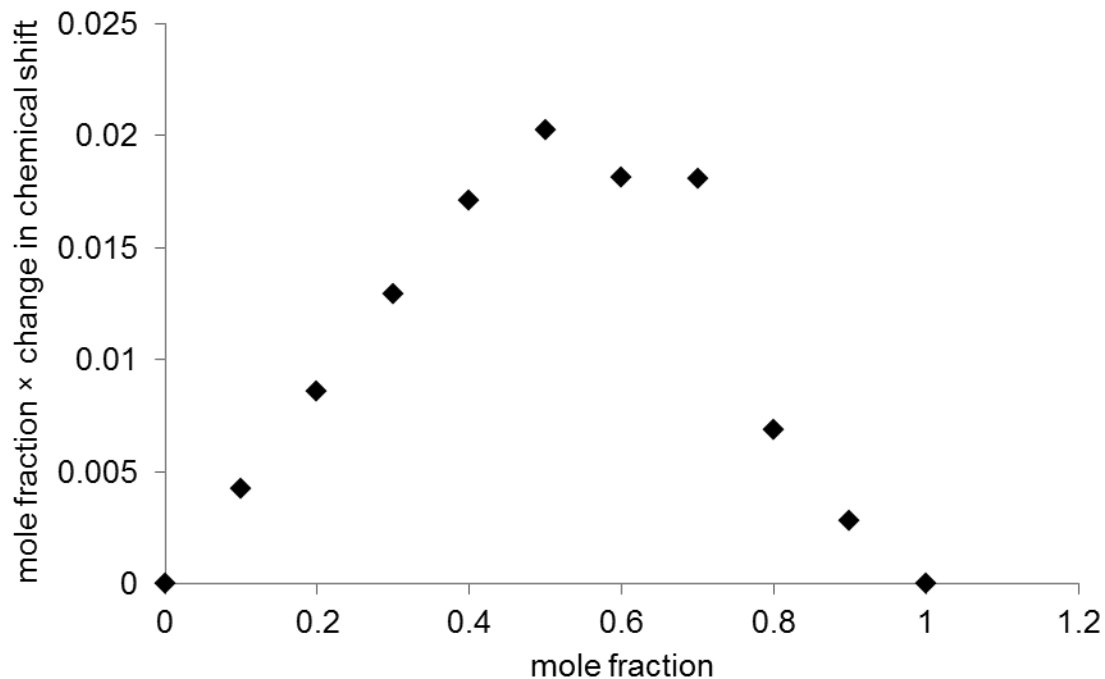

**Figure S61.** Job plot establishing 1:1 binding of **22** (0 - 1 mM) with **2** (0 - 1 mM) based on change in chemical shift of  $^1\text{H}$  NMR (400 MHz,  $\text{D}_2\text{O}$ ).

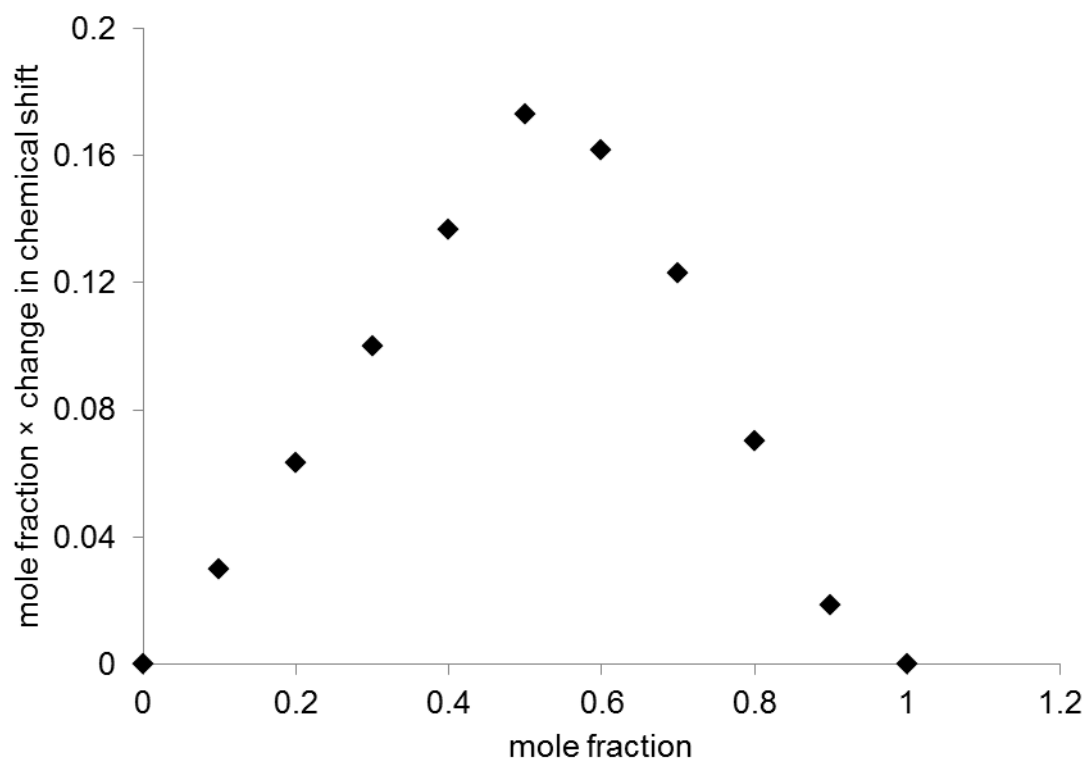

**Figure S62.** Job plot establishing 1:1 binding of **23** (0 - 1 mM) with **2** (0 - 1 mM) based on change in chemical shift of  $^1\text{H}$  NMR (400 MHz,  $\text{D}_2\text{O}$ ).

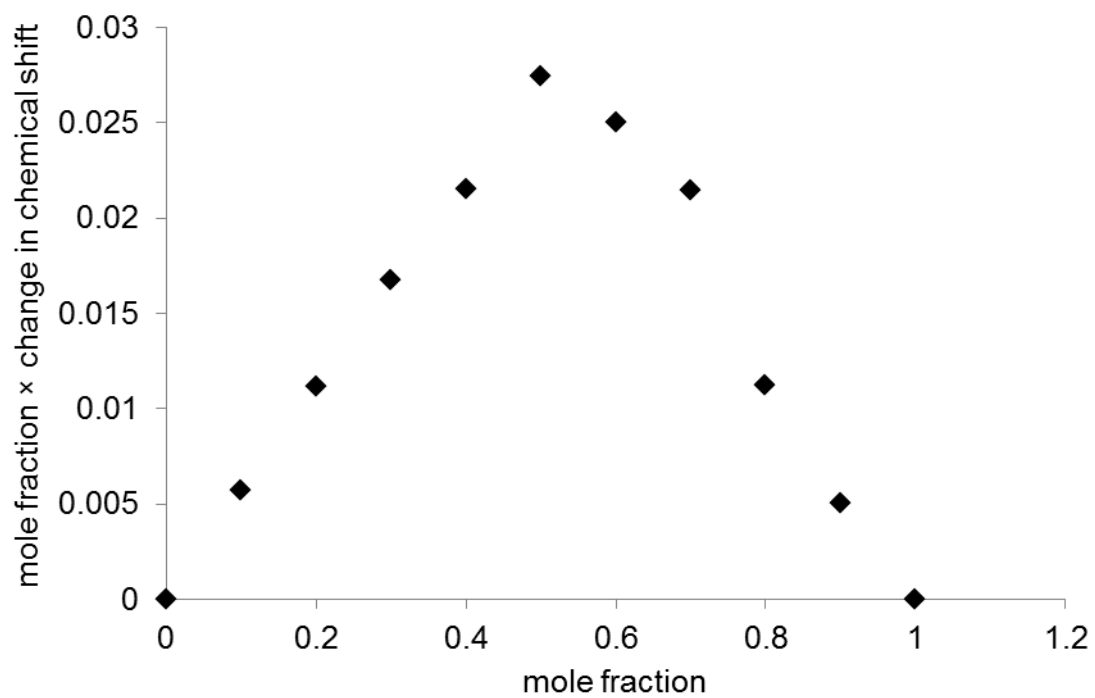

**Figure S63.** Job plot establishing 1:1 binding of **28** (0 - 1 mM) with **2** (0 - 1 mM) based on change in chemical shift of  $^1\text{H}$  NMR (400 MHz,  $\text{D}_2\text{O}$ ).

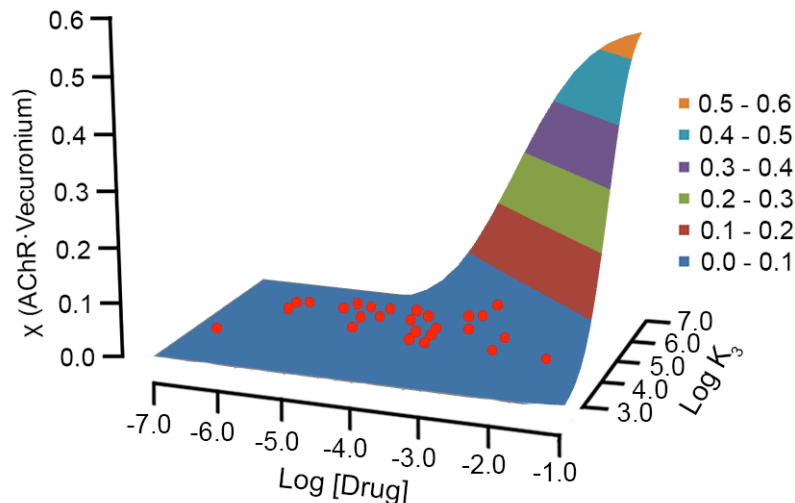

**Figure S64.** Three dimensional surface plot of the equilibrium mole fraction of AChR•vecuronium versus log [Drug] and log K<sub>3</sub> for vecuronium at [Vecuronium] = [AChR] = 27 μM, [2] = 54 μM (2 eqv.), K<sub>1</sub> = 10<sup>5</sup> M<sup>-1</sup>, K<sub>2</sub> = 1.6 × 10<sup>9</sup> M<sup>-1</sup>. The red dots mark the points corresponding to each of the 27 drugs (2 – 29).

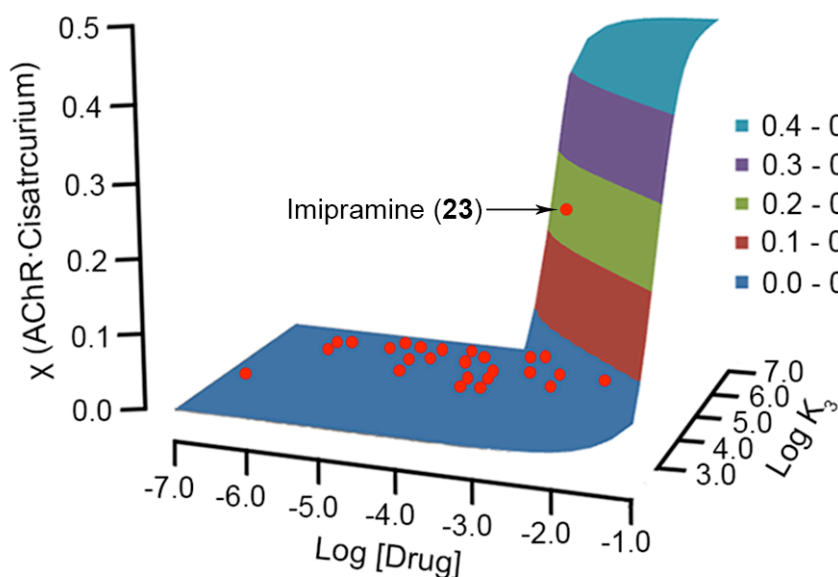

**Figure S65.** Three dimensional surface plot of the equilibrium mole fraction of AChR•cisatracurium versus log [Drug] and log K<sub>3</sub> at [Cisatracurium] = [AChR] = 18 μM, [2] = 576 μM (32 eqv.), K<sub>1</sub> = 10<sup>5</sup> M<sup>-1</sup>, K<sub>2</sub> = 4.8 × 10<sup>6</sup> M<sup>-1</sup>. The red dots mark the points corresponding to each of the 27 drugs (2 – 29).

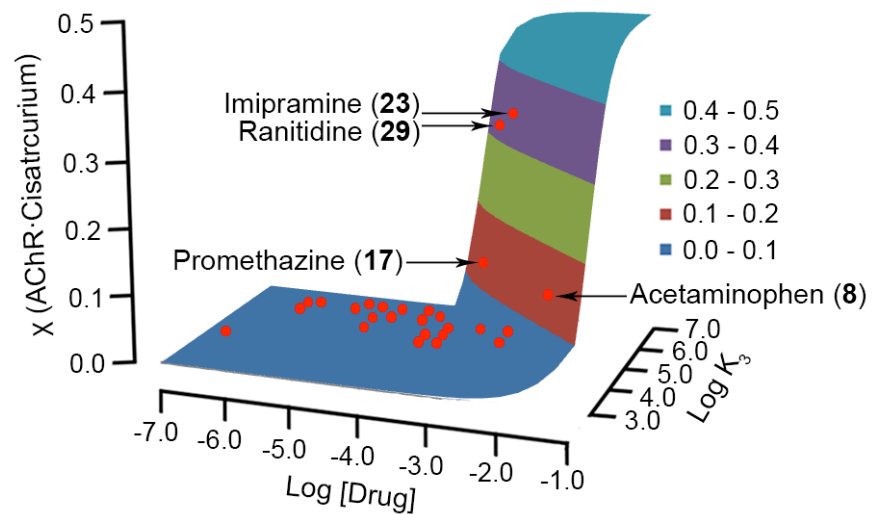

**Figure S66.** Three dimensional surface plot of the equilibrium mole fraction of AChR•cistracurium versus  $\log [\text{Drug}]$  and  $\log K_3$  at  $[\text{Cisatracurium}] = [\text{AChR}] = 18 \mu\text{M}$ ,  $[\mathbf{2}] = 288 \mu\text{M}$  (16 eqv.),  $K_1 = 10^5 \text{ M}^{-1}$ ,  $K_2 = 4.8 \times 10^6 \text{ M}^{-1}$ . The red dots mark the points corresponding to each of the 27 drugs (**2 – 29**).
